# Supplementary material
Source: PubMed Central journal article supplement (PMC2605690)
Supplement: NIHMS66497-supplement-01.pdf [file NIHMS66497-supplement-01.pdf]

## **SUPPLEMENTARY MATERIAL**

Groundwater samples from six nests of 37 monitoring wells, collected bi-weekly to monthly were transported to USA and were analyzed by an Axiom Single Collector high-resolution inductively-coupled plasma mass spectrometry (HR ICP-MS) at Lamont-Doherty Earth Observatory (LDEO) of Columbia University, NY and by ion chromatography (IC) using a DIONEX-500 IC system at Queens College, NY. Not-filtered, acidified samples were run by HR ICP-MS for total concentrations of As, P, Fe, Mn, S, Ca, Mg, K, Na and 33 other trace elements and Cl were determined by ion chromatography in the not filtered not acidified samples, following EPA method 300, a standard protocol for anion analyses.

### **Tables**

Time series ions concentration for 37 monitoring wells including weekly or bi-weekly water level data are compiled in tables 1 to 43. Tables 1-9, 10-18, 19-24, 25-30, 31-37 and 38-43 represents the data for site A, B, C, E, F and G respectively.

### **Figures**

The temporal data of shallow groundwater As, P, sum of major cations (SMC) as  $\text{Na}+\text{K}+2\text{Mg}+2\text{Ca}$ , Cl, Fe, Mn and  $\text{SO}_4$  were plotted as the ratio ( $C/C_{\text{avg}}$ ) of the concentration at the time of the sampling ( $C$ ) vs. the average concentration of the entire time series ( $C_{\text{avg}}$ ) for sites A, B, C, E, F and G in Figures 1, 2, 3, 4, 5, and 6, respectively. The temporal trends of As and other ions in deeper aquifer is described in Figure 7.

Table-1. Time series data for As and other ions in shallow well at site A (depth - 7 m)

| Date of Sampling | As ( $\mu\text{moleL}^{-1}$ ) | P ( $\mu\text{moleL}^{-1}$ ) | Na ( $\mu\text{moleL}^{-1}$ ) | Mg ( $\mu\text{moleL}^{-1}$ ) | K ( $\mu\text{moleL}^{-1}$ ) | Ca ( $\mu\text{moleL}^{-1}$ ) | SMC (meqL <sup>-1</sup> ) | Fe ( $\mu\text{moleL}^{-1}$ ) | Mn ( $\mu\text{moleL}^{-1}$ ) | S ( $\mu\text{moleL}^{-1}$ ) | Cl (mmoleL <sup>-1</sup> ) |
|------------------|-------------------------------|------------------------------|-------------------------------|-------------------------------|------------------------------|-------------------------------|---------------------------|-------------------------------|-------------------------------|------------------------------|----------------------------|
| 2/6/01           | 1.21                          | 30                           | 1166                          | 728                           | 1604                         | 1342                          | 6.91                      | 457                           | 70                            | 458                          | 1.37                       |
| 2/19/01          | 1.19                          | 27                           | 1106                          | 750                           | 1583                         | 1279                          | 6.75                      | 447                           | 67                            | 544                          | -                          |
| 3/2/01           | 1.23                          | 26                           | 1079                          | 707                           | 1567                         | 1258                          | 6.58                      | 419                           | 64                            | 575                          | -                          |
| 3/17/01          | 1.22                          | 27                           | 1327                          | 643                           | 1481                         | 1138                          | 6.37                      | 403                           | 58                            | 578                          | -                          |
| 3/31/01          | 1.19                          | 25                           | 1522                          | 608                           | 1419                         | 1039                          | 6.23                      | 376                           | 54                            | 605                          | -                          |
| 4/14/01          | 1.11                          | 21                           | 644                           | 313                           | 1402                         | 1075                          | 4.82                      | 365                           | 55                            | 550                          | -                          |
| 4/28/01          | 1.09                          | 20                           | 1190                          | 652                           | 1471                         | 1174                          | 6.31                      | 352                           | 58                            | 511                          | -                          |
| 5/12/01          | 1.06                          | 15                           | 1071                          | 740                           | 1548                         | 1258                          | 6.62                      | 355                           | 65                            | 482                          | -                          |
| 5/26/01          | 1.10                          | 17                           | 1068                          | 679                           | 1519                         | 1188                          | 6.32                      | 318                           | 61                            | 448                          | -                          |
| 6/9/01           | 1.10                          | 18                           | 961                           | 705                           | 1517                         | 1187                          | 6.26                      | 353                           | 61                            | 433                          | -                          |
| 7/14/01          | 1.05                          | 23                           | 968                           | 588                           | 1372                         | 1012                          | 5.54                      | 327                           | 52                            | 411                          | 1.33                       |
| 7/28/01          | 0.73                          | 19                           | 917                           | 528                           | 1229                         | 936                           | 5.07                      | 434                           | 46                            | 260                          | 1.32                       |
| 8/11/01          | 1.05                          | 23                           | 976                           | 725                           | 1504                         | 1193                          | 6.32                      | 421                           | 63                            | 396                          | 1.39                       |
| 8/25/01          | 1.08                          | 25                           | 984                           | 656                           | 1440                         | 1123                          | 5.98                      | 391                           | 59                            | 407                          | 1.36                       |
| 9/8/01           | 1.06                          | 24                           | 971                           | 638                           | 1395                         | 1096                          | 5.83                      | 376                           | 56                            | 390                          | 1.34                       |
| 9/22/01          | 1.05                          | 25                           | 989                           | 646                           | 1426                         | 1103                          | 5.91                      | 373                           | 43                            | 384                          | -                          |
| 9/28/01          | 1.04                          | 26                           | 1026                          | 627                           | 1372                         | 1064                          | 5.78                      | 365                           | 55                            | 380                          | 1.33                       |
| 10/27/01         | 1.04                          | 26                           | 966                           | 495                           | 1235                         | 856                           | 4.90                      | 299                           | 45                            | 380                          | 1.29                       |
| 10/27/01         | 1.02                          | 23                           | 1138                          | 382                           | 1424                         | 849                           | 5.02                      | 363                           | 34                            | 255                          | -                          |
| 11/24/01         | 1.19                          | 22                           | 1055                          | 681                           | 1350                         | 1181                          | 6.13                      | 380                           | 56                            | 457                          | -                          |
| 1/5/02           | 1.21                          | 21                           | 1049                          | 863                           | 1282                         | 1282                          | 6.62                      | 425                           | 66                            | 434                          | 1.24                       |
| 3/30/02          | 1.21                          | 18                           | 1265                          | 1084                          | 1308                         | 1366                          | 7.47                      | 538                           | 52                            | 221                          | 1.17                       |
| 4/27/02          | 1.14                          | 20                           | 891                           | 1279                          | 1038                         | 1639                          | 7.77                      | 560                           | 48                            | 217                          | 1.25                       |
| 5/27/02          | 0.97                          | 15                           | 860                           | 571                           | 942                          | 934                           | 4.81                      | 350                           | 30                            | 254                          | 1.13                       |
| 6/30/02          | 1.00                          | 17                           | 871                           | 408                           | 1003                         | 769                           | 4.23                      | 364                           | 27                            | 312                          | 0.95                       |
| 7/27/02          | 1.02                          | 19                           | 1009                          | 499                           | 1035                         | 834                           | 4.71                      | 390                           | 31                            | 349                          | 1.13                       |
| 8/31/02          | 0.98                          | 18                           | 832                           | 679                           | 855                          | 1009                          | 5.06                      | 390                           | 32                            | 308                          | 1.10                       |
| 10/10/02         | 0.96                          | 18                           | 946                           | 254                           | 977                          | 636                           | 3.70                      | 271                           | 24                            | 205                          | 0.99                       |
| 11/16/02         | 1.10                          | 18                           | 1041                          | 453                           | 1067                         | 791                           | 4.60                      | 370                           | 30                            | 343                          | 1.17                       |
| 12/16/02         | 1.26                          | 19                           | 1062                          | 745                           | 1038                         | 1167                          | 5.92                      | 497                           | 43                            | 317                          | 1.09                       |
| 2/22/03          | 1.11                          | 20                           | 908                           | 554                           | 1043                         | 1009                          | 5.08                      | 528                           | 41                            | 249                          | -                          |
| 3/23/03          | 0.96                          | 10                           | 1025                          | 709                           | 1187                         | 1216                          | 6.06                      | 428                           | 50                            | 218                          | -                          |
| 4/19/03          | 1.03                          | 15                           | 967                           | 659                           | 1153                         | 1183                          | 5.80                      | 581                           | 46                            | 220                          | -                          |
| 5/20/03          | 0.98                          | 13                           | 859                           | 466                           | 970                          | 825                           | 4.41                      | 407                           | 40                            | 363                          | -                          |
| 6/21/03          | 0.96                          | 14                           | 824                           | 390                           | 911                          | 719                           | 3.95                      | 335                           | 34                            | 342                          | -                          |
| 7/23/03          | 0.94                          | 14                           | 831                           | 396                           | 908                          | 713                           | 3.96                      | 357                           | 34                            | 344                          | -                          |
| 8/21/03          | 0.98                          | 13                           | 875                           | 414                           | 935                          | 742                           | 4.12                      | 347                           | 35                            | 324                          | -                          |
| 9/23/03          | 0.91                          | 13                           | 835                           | 411                           | 926                          | 750                           | 4.08                      | 341                           | 35                            | 325                          | -                          |
| 11/22/03         | 1.01                          | 22                           | 1037                          | 551                           | 1204                         | 908                           | 5.16                      | 440                           | 36                            | 451                          | 1.29                       |
| 12/26/03         | 1.08                          | 24                           | 1334                          | 768                           | 1403                         | 1315                          | 6.90                      | 698                           | 52                            | 406                          | 1.29                       |
| 1/26/04          | 1.04                          | 26                           | 1147                          | 618                           | 1254                         | 1068                          | 5.77                      | 547                           | 45                            | 297                          | 1.22                       |
| 2/26/04          | 1.03                          | 27                           | 1079                          | 557                           | 1299                         | 1017                          | 5.53                      | 524                           | 41                            | 321                          | 1.13                       |

Table-2. Time series data for As and other ions in shallow well at site A (depth - 10 m)

| Date of Sampling | As ( $\mu\text{moleL}^{-1}$ ) | P ( $\mu\text{moleL}^{-1}$ ) | Na ( $\mu\text{moleL}^{-1}$ ) | Mg ( $\mu\text{moleL}^{-1}$ ) | K ( $\mu\text{moleL}^{-1}$ ) | Ca ( $\mu\text{moleL}^{-1}$ ) | SMC (meqL <sup>-1</sup> ) | Fe ( $\mu\text{moleL}^{-1}$ ) | Mn ( $\mu\text{moleL}^{-1}$ ) | S ( $\mu\text{moleL}^{-1}$ ) | Cl (mmoleL <sup>-1</sup> ) |
|------------------|-------------------------------|------------------------------|-------------------------------|-------------------------------|------------------------------|-------------------------------|---------------------------|-------------------------------|-------------------------------|------------------------------|----------------------------|
| 2/6/01           | 1.74                          | 18                           | 955                           | 1125                          | 116                          | 1497                          | 6.32                      | 211                           | 50                            | 142                          | 0.82                       |
| 2/19/01          | 1.66                          | 18                           | 922                           | 855                           | 106                          | 1180                          | 5.10                      | 165                           | 60                            | 273                          | -                          |
| 3/2/01           | 1.79                          | 18                           | 773                           | 720                           | 92                           | 982                           | 4.27                      | 139                           | 53                            | 111                          | -                          |
| 3/17/01          | 1.76                          | 17                           | 693                           | 658                           | 88                           | 909                           | 3.92                      | 134                           | 50                            | 89                           | -                          |
| 3/31/01          | 1.79                          | 17                           | 693                           | 803                           | 102                          | 1091                          | 4.58                      | 162                           | 59                            | 142                          | -                          |
| 4/14/01          | 1.48                          | 16                           | 689                           | 737                           | 92                           | 1020                          | 4.30                      | 149                           | 58                            | 112                          | -                          |
| 4/28/01          | 1.80                          | 18                           | 770                           | 778                           | 94                           | 1075                          | 4.57                      | 183                           | 63                            | 107                          | -                          |
| 5/12/01          | 1.90                          | 17                           | 754                           | 748                           | 92                           | 1073                          | 4.49                      | 167                           | 60                            | 105                          | -                          |
| 5/26/01          | 1.84                          | 17                           | 647                           | 614                           | 84                           | 838                           | 3.64                      | 133                           | 48                            | 56                           | -                          |
| 6/9/01           | 1.84                          | 18                           | 607                           | 612                           | 87                           | 839                           | 3.60                      | 135                           | 50                            | 51                           | 0.68                       |
| 7/14/01          | 1.76                          | 17                           | 657                           | 693                           | 105                          | 948                           | 4.05                      | 142                           | 53                            | 87                           | 0.78                       |
| 7/28/01          | 1.71                          | 17                           | 728                           | 721                           | 120                          | 986                           | 4.26                      | 168                           | 52                            | 93                           | 0.81                       |
| 8/11/01          | 1.79                          | 17                           | 652                           | 695                           | 107                          | 954                           | 4.06                      | 163                           | 54                            | 85                           | 0.80                       |
| 8/25/01          | 1.80                          | 17                           | 689                           | 678                           | 111                          | 930                           | 4.02                      | 156                           | 51                            | 87                           | 0.80                       |
| 9/8/01           | 1.76                          | 18                           | 716                           | 706                           | 107                          | 977                           | 4.19                      | 153                           | 55                            | 94                           | 0.81                       |
| 9/22/01          | 1.73                          | 17                           | 687                           | 680                           | 104                          | 972                           | 4.10                      | 157                           | 55                            | 93                           | 0.82                       |
| 9/28/01          | 1.75                          | 17                           | 719                           | 675                           | 106                          | 973                           | 4.12                      | 156                           | 54                            | 101                          | 0.83                       |
| 10/27/01         | 1.57                          | 17                           | 888                           | 868                           | 124                          | 1196                          | 5.14                      | 185                           | 60                            | 252                          | 0.73                       |
| 11/24/01         | 1.62                          | 16                           | 816                           | 794                           | 128                          | 1126                          | 4.79                      | 160                           | 60                            | 210                          | 0.65                       |
| 1/5/02           | 1.62                          | 17                           | 597                           | 592                           | 112                          | 964                           | 3.82                      | 136                           | 52                            | 108                          | 0.75                       |
| 3/30/02          | 1.81                          | 17                           | 725                           | 475                           | 102                          | 967                           | 3.71                      | 222                           | 43                            | 106                          | 0.65                       |
| 4/27/02          | 1.72                          | 16                           | 683                           | 502                           | 99                           | 999                           | 3.79                      | 148                           | 43                            | 134                          | 0.77                       |
| 5/27/02          | 1.71                          | 16                           | 779                           | 513                           | 87                           | 886                           | 3.66                      | 126                           | 40                            | 55                           | 0.52                       |
| 6/30/02          | 1.86                          | 16                           | 773                           | 553                           | 85                           | 939                           | 3.84                      | 153                           | 42                            | 103                          | 0.74                       |
| 7/27/02          | 2.05                          | 17                           | 698                           | 499                           | 84                           | 955                           | 3.69                      | 210                           | 45                            | 100                          | 0.70                       |
| 8/31/02          | 1.74                          | 16                           | 762                           | 532                           | 81                           | 927                           | 3.76                      | 148                           | 43                            | 88                           | 0.68                       |
| 10/10/02         | 1.64                          | 18                           | 761                           | 523                           | 78                           | 888                           | 3.66                      | 152                           | 37                            | 85                           | 0.70                       |
| 11/16/02         | 1.63                          | 16                           | 816                           | 550                           | 78                           | 901                           | 3.80                      | 138                           | 40                            | 113                          | 0.73                       |
| 12/16/02         | 1.74                          | 15                           | 853                           | 633                           | 85                           | 1026                          | 4.26                      | 153                           | 45                            | 225                          | -                          |
| 2/22/03          | 1.82                          | 14                           | 1023                          | 698                           | 91                           | 1133                          | 4.78                      | 181                           | 61                            | 210                          | -                          |
| 3/23/03          | 1.80                          | 14                           | 914                           | 608                           | 80                           | 972                           | 4.16                      | 157                           | 50                            | 152                          | -                          |
| 4/19/03          | 1.85                          | 14                           | 935                           | 647                           | 83                           | 1025                          | 4.37                      | 163                           | 50                            | 196                          | -                          |
| 5/20/03          | 1.81                          | 13                           | 882                           | 655                           | 86                           | 1017                          | 4.31                      | 151                           | 50                            | 198                          | -                          |
| 6/21/03          | 1.92                          | 14                           | 862                           | 571                           | 80                           | 932                           | 3.95                      | 148                           | 52                            | 148                          | -                          |
| 7/23/03          | 1.93                          | 14                           | 908                           | 603                           | 79                           | 991                           | 4.18                      | 159                           | 48                            | 171                          | -                          |
| 8/21/03          | 1.86                          | 14                           | 902                           | 634                           | 82                           | 995                           | 4.24                      | 165                           | 47                            | 177                          | -                          |
| 9/23/03          | 1.82                          | 15                           | 911                           | 633                           | 79                           | 1002                          | 4.26                      | 164                           | 54                            | 176                          | -                          |
| 11/22/03         | 1.56                          | 16                           | 604                           | 705                           | 110                          | 913                           | 3.95                      | 143                           | 43                            | 138                          | 0.69                       |
| 12/26/03         | 1.57                          | 16                           | 572                           | 660                           | 111                          | 920                           | 3.87                      | 142                           | 42                            | 130                          | 0.80                       |
| 1/26/04          | 1.71                          | 16                           | 620                           | 722                           | 111                          | 971                           | 4.12                      | 152                           | 46                            | 151                          | 0.82                       |
| 2/26/04          | 1.70                          | 15                           | 872                           | 1000                          | 124                          | 1347                          | 5.69                      | 217                           | 63                            | 315                          | 0.86                       |

Table-3. Time series data for As and other ions in shallow well at site A (depth - 13 m)

| Date of Sampling | As ( $\mu\text{moleL}^{-1}$ ) | P ( $\mu\text{moleL}^{-1}$ ) | Na ( $\mu\text{moleL}^{-1}$ ) | Mg ( $\mu\text{moleL}^{-1}$ ) | K ( $\mu\text{moleL}^{-1}$ ) | Ca ( $\mu\text{moleL}^{-1}$ ) | SMC ( $\text{meqL}^{-1}$ ) | Fe ( $\mu\text{moleL}^{-1}$ ) | Mn ( $\mu\text{moleL}^{-1}$ ) | S ( $\mu\text{moleL}^{-1}$ ) | Cl ( $\text{mmoleL}^{-1}$ ) |
|------------------|-------------------------------|------------------------------|-------------------------------|-------------------------------|------------------------------|-------------------------------|----------------------------|-------------------------------|-------------------------------|------------------------------|-----------------------------|
| 2/6/01           | 6.37                          | 35                           | 866                           | 737                           | 97                           | 1374                          | 5.19                       | 221                           | 91                            | 51                           | 1.35                        |
| 2/19/01          | 6.42                          | 41                           | 1031                          | 716                           | 100                          | 1342                          | 5.25                       | 263                           | 97                            | 30                           | -                           |
| 3/2/01           | 7.10                          | 40                           | 869                           | 732                           | 98                           | 1393                          | 5.22                       | 268                           | 93                            | 19                           | -                           |
| 3/17/01          | 7.18                          | 39                           | 848                           | 755                           | 96                           | 1418                          | 5.29                       | 267                           | 100                           | 13                           | -                           |
| 3/31/01          | 7.27                          | 38                           | 852                           | 766                           | 102                          | 1468                          | 5.43                       | 279                           | 96                            | 12                           | -                           |
| 4/14/01          | 6.60                          | 34                           | 808                           | 747                           | 94                           | 1436                          | 5.27                       | 228                           | 95                            | 7                            | -                           |
| 4/28/01          | 6.82                          | 36                           | 847                           | 767                           | 98                           | 1461                          | 5.40                       | 267                           | 97                            | 10                           | -                           |
| 5/12/01          | 8.02                          | 41                           | 884                           | 776                           | 100                          | 1472                          | 5.48                       | 277                           | 101                           | 9                            | -                           |
| 5/26/01          | 7.78                          | 41                           | 846                           | 754                           | 99                           | 1433                          | 5.32                       | 273                           | 102                           | 19                           | -                           |
| 6/9/01           | 7.51                          | 39                           | 819                           | 740                           | 97                           | 1432                          | 5.26                       | 228                           | 93                            | 22                           | 1.24                        |
| 7/14/01          | 7.64                          | 39                           | 778                           | 703                           | 97                           | 1362                          | 5.01                       | 264                           | 98                            | 11                           | 1.22                        |
| 7/28/01          | 6.98                          | 34                           | 720                           | 655                           | 91                           | 1311                          | 4.75                       | 251                           | 95                            | 10                           | 1.24                        |
| 8/11/01          | 7.52                          | 38                           | 771                           | 715                           | 94                           | 1381                          | 5.06                       | 265                           | 95                            | 14                           | 1.22                        |
| 8/25/01          | 7.54                          | 38                           | 740                           | 690                           | 96                           | 1386                          | 4.99                       | 258                           | 95                            | 17                           | 1.23                        |
| 9/8/01           | 7.81                          | 38                           | 744                           | 704                           | 96                           | 1372                          | 4.99                       | 256                           | 97                            | 23                           | 1.25                        |
| 9/22/01          | 7.99                          | 39                           | 743                           | 690                           | 94                           | 1392                          | 5.00                       | 256                           | 96                            | 25                           | 1.17                        |
| 9/28/01          | 7.81                          | 38                           | 730                           | 693                           | 94                           | 1390                          | 4.99                       | 257                           | 96                            | 29                           | 1.24                        |
| 10/27/01         | 7.34                          | 36                           | 673                           | 690                           | 94                           | 1406                          | 4.96                       | 277                           | 99                            | 62                           | 1.23                        |
| 11/24/01         | 8.01                          | 37                           | 729                           | 715                           | 99                           | 1433                          | 5.13                       | 280                           | 99                            | 16                           | 1.25                        |
| 1/5/02           | 7.95                          | 37                           | 719                           | 712                           | 101                          | 1450                          | 5.15                       | 294                           | 101                           | 29                           | 1.18                        |
| 3/30/02          | 7.89                          | 31                           | 1208                          | 645                           | 95                           | 1454                          | 5.50                       | 231                           | 93                            | 89                           | 1.30                        |
| 4/27/02          | 7.46                          | 31                           | 1316                          | 735                           | 89                           | 1411                          | 5.70                       | 196                           | 90                            | 34                           | 1.21                        |
| 5/27/02          | 8.08                          | 30                           | 1254                          | 719                           | 93                           | 1426                          | 5.64                       | 228                           | 94                            | 46                           | 1.28                        |
| 6/30/02          | 7.23                          | 24                           | 1211                          | 678                           | 88                           | 1424                          | 5.51                       | 199                           | 91                            | 24                           | 1.31                        |
| 7/27/02          | 4.82                          | 9                            | 1195                          | 644                           | 86                           | 1423                          | 5.42                       | 217                           | 90                            | 18                           | 1.27                        |
| 8/31/02          | 3.59                          | 6                            | 1440                          | 799                           | 87                           | 1424                          | 5.98                       | 221                           | 88                            | 18                           | 1.24                        |
| 10/10/02         | 5.62                          | 13                           | 1280                          | 688                           | 84                           | 1403                          | 5.55                       | 203                           | 86                            | 21                           | 1.14                        |
| 11/16/02         | 7.52                          | 29                           | 1326                          | 745                           | 88                           | 1464                          | 5.83                       | 180                           | 94                            | 18                           | 1.14                        |
| 12/16/02         | 6.91                          | 27                           | 877                           | 758                           | 92                           | 1398                          | 5.28                       | 233                           | 93                            | 19                           | -                           |
| 2/22/03          | 6.98                          | 24                           | 908                           | 791                           | 89                           | 1391                          | 5.36                       | 278                           | 100                           | 20                           | -                           |
| 3/23/03          | 7.18                          | 23                           | 905                           | 780                           | 91                           | 1388                          | 5.33                       | 279                           | 95                            | 21                           | -                           |
| 4/19/03          | 7.03                          | 23                           | 896                           | 762                           | 88                           | 1380                          | 5.27                       | 270                           | 95                            | 19                           | -                           |
| 5/20/03          | 7.14                          | 23                           | 901                           | 800                           | 93                           | 1401                          | 5.40                       | 288                           | 95                            | 29                           | -                           |
| 6/21/03          | 7.16                          | 24                           | 920                           | 778                           | 94                           | 1435                          | 5.44                       | 294                           | 96                            | 22                           | -                           |
| 7/23/03          | 7.08                          | 26                           | 894                           | 783                           | 91                           | 1498                          | 5.55                       | 286                           | 106                           | 20                           | -                           |
| 8/21/03          | 7.13                          | 24                           | 906                           | 794                           | 88                           | 1410                          | 5.40                       | 281                           | 99                            | 18                           | -                           |
| 9/23/03          | 7.28                          | 24                           | 894                           | 772                           | 92                           | 1457                          | 5.45                       | 280                           | 98                            | 18                           | -                           |
| 11/22/03         | 7.72                          | 33                           | 973                           | 967                           | 110                          | 1666                          | 6.35                       | 331                           | 104                           | 28                           | 1.23                        |
| 12/26/03         | 7.68                          | 33                           | 967                           | 969                           | 110                          | 1657                          | 6.33                       | 332                           | 102                           | 27                           | 1.64                        |
| 1/26/04          | 7.69                          | 31                           | 954                           | 927                           | 111                          | 1661                          | 6.24                       | 332                           | 99                            | 27                           | 1.62                        |
| 2/26/04          | 7.57                          | 30                           | 958                           | 947                           | 114                          | 1638                          | 6.24                       | 337                           | 98                            | 28                           | 1.37                        |

Table-4. Time series data for As and other ions in shallow well at site A (depth - 15 m)

| Date of Sampling | As ( $\mu\text{moleL}^{-1}$ ) | P ( $\mu\text{moleL}^{-1}$ ) | Na ( $\mu\text{moleL}^{-1}$ ) | Mg ( $\mu\text{moleL}^{-1}$ ) | K ( $\mu\text{moleL}^{-1}$ ) | Ca ( $\mu\text{moleL}^{-1}$ ) | SMC ( $\text{meqL}^{-1}$ ) | Fe ( $\mu\text{moleL}^{-1}$ ) | Mn ( $\mu\text{moleL}^{-1}$ ) | S ( $\mu\text{moleL}^{-1}$ ) | Cl ( $\text{mmoleL}^{-1}$ ) |
|------------------|-------------------------------|------------------------------|-------------------------------|-------------------------------|------------------------------|-------------------------------|----------------------------|-------------------------------|-------------------------------|------------------------------|-----------------------------|
| 2/6/01           | 4.29                          | 25                           | 1972                          | 1124                          | 106                          | 1457                          | 7.24                       | 220                           | 20                            | 8                            | 0.97                        |
| 2/19/01          | 4.46                          | 23                           | 1936                          | 1081                          | 102                          | 1451                          | 7.10                       | 221                           | 19                            | 7                            | -                           |
| 3/2/01           | 5.10                          | 33                           | 1993                          | 1122                          | 107                          | 1478                          | 7.30                       | 310                           | 20                            | 8                            | 0.87                        |
| 3/17/01          | 5.40                          | 29                           | 2025                          | 1100                          | 100                          | 1430                          | 7.18                       | 310                           | 19                            | 6                            | 0.96                        |
| 3/31/01          | 4.94                          | 29                           | 2013                          | 1086                          | 102                          | 1436                          | 7.16                       | 274                           | 17                            | 6                            | 0.94                        |
| 4/14/01          | 5.01                          | 27                           | 1992                          | 1076                          | 99                           | 1420                          | 7.08                       | 287                           | 17                            | 6                            | 0.98                        |
| 4/28/01          | 5.43                          | 29                           | 1947                          | 1056                          | 101                          | 1406                          | 6.97                       | 320                           | 19                            | 6                            | -                           |
| 5/12/01          | 5.27                          | 30                           | 1997                          | 1051                          | 99                           | 1425                          | 7.05                       | 320                           | 18                            | 5                            | -                           |
| 5/26/01          | 5.53                          | 35                           | 1918                          | 1033                          | 102                          | 1407                          | 6.90                       | 351                           | 18                            | 7                            | -                           |
| 6/9/01           | 5.28                          | 30                           | 1936                          | 1043                          | 101                          | 1413                          | 6.95                       | 323                           | 17                            | 5                            | 0.99                        |
| 7/14/01          | 5.46                          | 31                           | 1795                          | 1031                          | 101                          | 1448                          | 6.85                       | 359                           | 17                            | 6                            | 1.00                        |
| 7/28/01          | 5.43                          | 28                           | 1785                          | 1021                          | 98                           | 1427                          | 6.77                       | 345                           | 17                            | 6                            | 1.01                        |
| 8/11/01          | 5.66                          | 30                           | 1837                          | 1047                          | 103                          | 1491                          | 7.01                       | 368                           | 18                            | 6                            | 1.03                        |
| 8/25/01          | 5.41                          | 30                           | 1876                          | 1041                          | 101                          | 1445                          | 6.95                       | 368                           | 17                            | 6                            | 1.04                        |
| 9/8/01           | 5.48                          | 31                           | 1844                          | 1084                          | 120                          | 1518                          | 7.17                       | 524                           | 20                            | 7                            | 1.05                        |
| 9/22/01          | 5.70                          | 31                           | 1680                          | 989                           | 98                           | 1457                          | 6.67                       | 396                           | 19                            | 7                            | -                           |
| 9/28/01          | 5.48                          | 35                           | 1829                          | 1043                          | 102                          | 1464                          | 6.94                       | 403                           | 17                            | 6                            | 1.06                        |
| 10/27/01         | 5.53                          | 31                           | 1857                          | 1044                          | 97                           | 1444                          | 6.93                       | 387                           | 18                            | 6                            | 1.09                        |
| 11/24/01         | 4.98                          | 28                           | 1902                          | 1023                          | 100                          | 1411                          | 6.87                       | 331                           | 16                            | 5                            | -                           |
| 1/5/02           | 4.61                          | 26                           | 1967                          | 986                           | 101                          | 1391                          | 6.82                       | 312                           | 16                            | 6                            | 1.13                        |
| 6/30/02          | 4.74                          | 23                           | 2108                          | 1119                          | 73                           | 1458                          | 7.33                       | 339                           | 19                            | 6                            | 0.91                        |
| 7/27/02          | 5.46                          | 27                           | 2106                          | 1156                          | 65                           | 1318                          | 7.12                       | 385                           | 20                            | 6                            | -                           |
| 8/31/02          | 4.19                          | 19                           | 2165                          | 1127                          | 64                           | 1296                          | 7.07                       | 335                           | 19                            | 6                            | 0.86                        |
| 10/10/02         | 4.53                          | 24                           | 1839                          | 1032                          | 67                           | 1298                          | 6.56                       | 391                           | 23                            | 6                            | 0.87                        |
| 11/16/02         | 4.95                          | 20                           | 2007                          | 1080                          | 61                           | 1171                          | 6.57                       | 339                           | 21                            | 6                            | 0.92                        |
| 12/16/02         | 3.90                          | 18                           | 2253                          | 1057                          | 61                           | 1191                          | 6.81                       | 281                           | 17                            | 5                            | 1.05                        |
| 2/22/03          | 4.18                          | 21                           | 2183                          | 1057                          | 64                           | 1225                          | 6.81                       | 324                           | 17                            | 5                            | -                           |
| 3/23/03          | 3.94                          | 18                           | 2206                          | 1058                          | 63                           | 1196                          | 6.77                       | 310                           | 17                            | 5                            | -                           |
| 4/19/03          | 4.13                          | 21                           | 2101                          | 1066                          | 63                           | 1231                          | 6.76                       | 322                           | 17                            | 5                            | -                           |
| 5/20/03          | 4.09                          | 19                           | 2002                          | 1046                          | 60                           | 1227                          | 6.61                       | 314                           | 17                            | 6                            | -                           |
| 6/21/03          | 4.11                          | 21                           | 2025                          | 1045                          | 62                           | 1339                          | 6.85                       | 332                           | 18                            | 8                            | -                           |
| 7/23/03          | 4.12                          | 21                           | 1981                          | 1040                          | 64                           | 1275                          | 6.67                       | 322                           | 17                            | 5                            | -                           |
| 8/21/03          | 4.24                          | 21                           | 1995                          | 1060                          | 64                           | 1251                          | 6.68                       | 344                           | 17                            | 6                            | -                           |
| 9/23/03          | 4.28                          | 21                           | 2044                          | 1060                          | 64                           | 1258                          | 6.74                       | 348                           | 18                            | 5                            | -                           |
| 11/22/03         | 4.02                          | 27                           | 2347                          | 1292                          | 136                          | 1416                          | 7.90                       | 325                           | 16                            | 8                            | 0.92                        |
| 12/26/03         | 4.23                          | 28                           | 2247                          | 1228                          | 133                          | 1398                          | 7.63                       | 329                           | 16                            | 9                            | 0.97                        |
| 1/26/04          | 4.30                          | 26                           | 2254                          | 1248                          | 128                          | 1386                          | 7.65                       | 326                           | 16                            | 9                            | 1.00                        |
| 2/26/04          | 4.07                          | 26                           | 2403                          | 1296                          | 133                          | 1427                          | 7.98                       | 315                           | 16                            | 9                            | 1.04                        |

Table-6. Time series data for As and other ions in deep well at site A (depth - 37 m)

| Date of Sampling | As ( $\mu\text{moleL}^{-1}$ ) | P ( $\mu\text{moleL}^{-1}$ ) | Na ( $\mu\text{moleL}^{-1}$ ) | Mg ( $\mu\text{moleL}^{-1}$ ) | K ( $\mu\text{moleL}^{-1}$ ) | Ca ( $\mu\text{moleL}^{-1}$ ) | SMC ( $\text{meqL}^{-1}$ ) | Fe ( $\mu\text{moleL}^{-1}$ ) | Mn ( $\mu\text{moleL}^{-1}$ ) | S ( $\mu\text{moleL}^{-1}$ ) | Cl ( $\text{mmoleL}^{-1}$ ) |
|------------------|-------------------------------|------------------------------|-------------------------------|-------------------------------|------------------------------|-------------------------------|----------------------------|-------------------------------|-------------------------------|------------------------------|-----------------------------|
| 1/19/01          | 0.01                          | 5                            | 2510                          | 239                           | 27                           | 417                           | 3.85                       | 1                             | 2                             | 39                           | 0.81                        |
| 2/6/01           | 0.01                          | 4                            | 2496                          | 169                           | 81                           | 450                           | 3.81                       | 4                             | 3                             | -                            | -                           |
| 2/19/01          | 0.01                          | 4                            | 2624                          | 172                           | 11                           | 446                           | 3.87                       | 9                             | 3                             | -                            | -                           |
| 3/2/01           | 0.01                          | 4                            | 2283                          | 142                           | 10                           | 411                           | 3.40                       | 16                            | 3                             | -                            | -                           |
| 3/17/01          | 0.01                          | 4                            | 2488                          | 160                           | 74                           | 399                           | 3.68                       | 20                            | 3                             | -                            | -                           |
| 3/31/01          | 0.01                          | 4                            | 2499                          | 157                           | 78                           | 398                           | 3.69                       | 16                            | 3                             | 1                            | -                           |
| 4/14/01          | 0.01                          | 4                            | 2367                          | 149                           | 93                           | 383                           | 3.52                       | 15                            | 3                             | 1                            | -                           |
| 4/28/01          | 0.01                          | 4                            | 2348                          | 135                           | 93                           | 400                           | 3.51                       | 6                             | 3                             | 2                            | -                           |
| 5/12/01          | 0.01                          | 4                            | 2551                          | 176                           | 96                           | 392                           | 3.78                       | 4                             | 3                             | 2                            | -                           |
| 5/26/01          | 0.01                          | 3                            | 2377                          | 152                           | 11                           | 394                           | 3.48                       | 15                            | 3                             | -                            | -                           |
| 6/9/01           | 0.01                          | 4                            | 2281                          | 139                           | 91                           | 387                           | 3.42                       | 19                            | 3                             | -                            | -                           |
| 7/14/01          | 0.01                          | 4                            | 2315                          | 147                           | 103                          | 391                           | 3.49                       | 16                            | 2                             | -                            | 0.75                        |
| 7/28/01          | 0.01                          | 3                            | 2167                          | 149                           | 98                           | 383                           | 3.33                       | 15                            | 2                             | -                            | -                           |
| 8/11/01          | 0.01                          | 4                            | 2363                          | 151                           | 95                           | 392                           | 3.54                       | 15                            | 2                             | -                            | 0.76                        |
| 8/25/01          | 0.01                          | 4                            | 2514                          | 158                           | 93                           | 376                           | 3.68                       | 15                            | 2                             | -                            | 0.77                        |
| 9/8/01           | 0.01                          | 4                            | 2307                          | 144                           | 12                           | 371                           | 3.35                       | 13                            | 2                             | 2                            | 0.77                        |
| 9/28/01          | 0.01                          | 4                            | 2388                          | 149                           | 101                          | 377                           | 3.54                       | 13                            | 2                             | 3                            | 0.76                        |
| 10/27/01         | 0.01                          | 4                            | 2263                          | 139                           | 11                           | 381                           | 3.31                       | 12                            | 2                             | 1                            | 0.76                        |
| 11/24/01         | 0.01                          | 4                            | 2404                          | 153                           | 10                           | 363                           | 3.44                       | 12                            | 2                             | -                            | 0.76                        |
| 1/5/02           | 0.01                          | 4                            | 2340                          | 124                           | 19                           | 342                           | 3.29                       | 13                            | 2                             | -                            | 0.78                        |
| 3/30/02          | 0.01                          | 4                            | 2766                          | 157                           | 18                           | 384                           | 3.87                       | 8                             | 1                             | 5                            | -                           |
| 4/27/02          | 0.01                          | 4                            | 2836                          | 157                           | 15                           | 376                           | 3.92                       | 8                             | 1                             | 4                            | -                           |
| 5/27/02          | 0.01                          | 4                            | 2176                          | 154                           | 8                            | 371                           | 3.23                       | 7                             | 1                             | 4                            | -                           |
| 6/30/02          | 0.01                          | 4                            | 2855                          | 157                           | 9                            | 377                           | 3.93                       | 13                            | 2                             | 4                            | -                           |
| 7/27/02          | 0.01                          | 4                            | 2898                          | 159                           | 8                            | 368                           | 3.96                       | 13                            | 2                             | 3                            | -                           |
| 8/31/02          | 0.01                          | 4                            | 2821                          | 150                           | 9                            | 379                           | 3.89                       | 11                            | 1                             | 3                            | -                           |
| 10/10/02         | 0.01                          | 4                            | 2741                          | 155                           | 13                           | 380                           | 3.82                       | 14                            | 2                             | 2                            | -                           |
| 11/16/02         | 0.01                          | 4                            | 2771                          | 189                           | 23                           | 376                           | 3.93                       | 14                            | 2                             | 3                            | -                           |
| 12/16/02         | 0.01                          | 4                            | 2883                          | 161                           | 14                           | 367                           | 3.96                       | 13                            | 2                             | 3                            | -                           |
| 2/22/03          | 0.01                          | 4                            | 2745                          | 160                           | 13                           | 364                           | 3.81                       | 6                             | 1                             | 24                           | -                           |
| 3/23/03          | 0.01                          | 4                            | 2837                          | 157                           | 12                           | 366                           | 3.89                       | 5                             | 1                             | 25                           | -                           |
| 4/19/03          | 0.01                          | 4                            | 2744                          | 154                           | 12                           | 372                           | 3.81                       | 5                             | 1                             | 25                           | -                           |
| 5/20/03          | 0.01                          | 4                            | 2787                          | 155                           | 12                           | 365                           | 3.84                       | 5                             | 1                             | 25                           | -                           |
| 6/21/03          | 0.01                          | 4                            | 2786                          | 154                           | 12                           | 363                           | 3.83                       | 4                             | 1                             | 25                           | -                           |
| 7/23/03          | 0.01                          | 4                            | 2808                          | 155                           | 12                           | 369                           | 3.87                       | 4                             | 1                             | 24                           | -                           |
| 8/21/03          | 0.01                          | 4                            | 2785                          | 157                           | 12                           | 360                           | 3.83                       | 5                             | 1                             | 24                           | -                           |
| 9/23/03          | 0.01                          | 4                            | 2863                          | 146                           | 13                           | 359                           | 3.89                       | 5                             | 1                             | 26                           | -                           |
| 11/22/03         | 0.01                          | 4                            | 2577                          | 222                           | 35                           | 412                           | 3.88                       | 5                             | 1                             | 33                           | -                           |
| 12/26/03         | 0.01                          | 4                            | 2697                          | 221                           | 35                           | 407                           | 3.99                       | 5                             | 1                             | 37                           | -                           |
| 1/26/04          | 0.01                          | 4                            | 2532                          | 225                           | 35                           | 400                           | 3.82                       | 4                             | 1                             | 38                           | -                           |
| 2/26/04          | 0.01                          | 4                            | 2698                          | 223                           | 36                           | 402                           | 3.98                       | 5                             | 1                             | 35                           | -                           |

Table-5. Time series data for As and other ions in deep well at site A (depth - 30 m)

| Date of Sampling | As ( $\mu\text{moleL}^{-1}$ ) | P ( $\mu\text{moleL}^{-1}$ ) | Na ( $\mu\text{moleL}^{-1}$ ) | Mg ( $\mu\text{moleL}^{-1}$ ) | K ( $\mu\text{moleL}^{-1}$ ) | Ca ( $\mu\text{moleL}^{-1}$ ) | SMC ( $\text{meqL}^{-1}$ ) | Fe ( $\mu\text{moleL}^{-1}$ ) | Mn ( $\mu\text{moleL}^{-1}$ ) | S ( $\mu\text{moleL}^{-1}$ ) | Cl ( $\text{mmoleL}^{-1}$ ) |
|------------------|-------------------------------|------------------------------|-------------------------------|-------------------------------|------------------------------|-------------------------------|----------------------------|-------------------------------|-------------------------------|------------------------------|-----------------------------|
| 2/6/01           | 0.01                          | 4                            | 2275                          | 233                           | 55                           | 393                           | 3.58                       | 1                             | 2                             | 12                           | -                           |
| 2/19/01          | 0.01                          | 4                            | 2433                          | 254                           | 59                           | 401                           | 3.80                       | 4                             | 3                             | 5                            | -                           |
| 3/2/01           | 0.01                          | 4                            | 2470                          | 247                           | 52                           | 298                           | 3.61                       | 9                             | 3                             | 0.3                          | -                           |
| 3/17/01          | 0.01                          | 4                            | 2397                          | 244                           | 53                           | 258                           | 3.46                       | 16                            | 3                             | 0.5                          | -                           |
| 3/31/01          | 0.01                          | 4                            | 2476                          | 244                           | 50                           | 246                           | 3.51                       | 20                            | 3                             | 5                            | -                           |
| 4/14/01          | 0.01                          | 4                            | 2472                          | 249                           | 62                           | 270                           | 3.57                       | 16                            | 3                             | 1                            | -                           |
| 4/28/01          | 0.01                          | 4                            | 2473                          | 253                           | 57                           | 247                           | 3.53                       | 15                            | 3                             | 0.3                          | -                           |
| 5/12/01          | 0.01                          | 4                            | 2478                          | 241                           | 52                           | 240                           | 3.49                       | 6                             | 3                             | 0.3                          | -                           |
| 5/26/01          | 0.01                          | 3                            | 2437                          | 243                           | 51                           | 246                           | 3.47                       | 4                             | 3                             | 1                            | -                           |
| 6/9/01           | 0.01                          | 4                            | 2449                          | 250                           | 52                           | 259                           | 3.52                       | 15                            | 3                             | 0.1                          | -                           |
| 7/14/01          | 0.01                          | 4                            | 2480                          | 250                           | 53                           | 240                           | 3.51                       | 19                            | 3                             | 0.3                          | 0.70                        |
| 7/28/01          | 0.01                          | 3                            | 2418                          | 245                           | 56                           | 256                           | 3.48                       | 16                            | 2                             | 16                           | 0.73                        |
| 8/11/01          | 0.01                          | 4                            | 2546                          | 251                           | 55                           | 255                           | 3.61                       | 15                            | 2                             | 16.4                         | 0.75                        |
| 8/25/01          | 0.01                          | 4                            | 2624                          | 265                           | 53                           | 235                           | 3.68                       | 15                            | 2                             | 0.3                          | 0.78                        |
| 9/8/01           | 0.01                          | 4                            | 2436                          | 242                           | 51                           | 226                           | 3.42                       | 15                            | 2                             | 12                           | 0.77                        |
| 9/28/01          | 0.01                          | 4                            | 2504                          | 242                           | 52                           | 231                           | 3.50                       | 13                            | 2                             | 0.3                          | 0.77                        |
| 10/27/01         | 0.01                          | 4                            | 2474                          | 245                           | 50                           | 228                           | 3.47                       | 13                            | 2                             | 0.3                          | 0.76                        |
| 11/24/01         | 0.01                          | 4                            | 2502                          | 248                           | 51                           | 226                           | 3.50                       | 12                            | 2                             | 0.3                          | 0.79                        |
| 1/5/02           | 0.01                          | 4                            | 2474                          | 240                           | 50                           | 227                           | 3.46                       | 12                            | 2                             | 5                            | -                           |
| 3/30/02          | 0.01                          | 4                            | 2733                          | 191                           | 11                           | 244                           | 3.62                       | 13                            | 2                             | 11                           | 0.76                        |
| 4/27/02          | 0.01                          | 4                            | 2579                          | 198                           | 13                           | 244                           | 3.48                       | 8                             | 1                             | -                            | 0.77                        |
| 5/27/02          | 0.01                          | 4                            | 2911                          | 214                           | 8                            | 243                           | 3.83                       | 8                             | 1                             | -                            | 0.78                        |
| 6/30/02          | 0.01                          | 4                            | 2742                          | 221                           | 57                           | 272                           | 3.78                       | 7                             | 1                             | -                            | 0.78                        |
| 7/27/02          | 0.01                          | 4                            | 2730                          | 227                           | 26                           | 266                           | 3.74                       | 13                            | 2                             | 12                           | 0.74                        |
| 8/31/02          | 0.01                          | 4                            | 2763                          | 216                           | 12                           | 257                           | 3.72                       | 13                            | 2                             | 15                           | 0.83                        |
| 10/10/02         | 0.01                          | 4                            | 2896                          | 224                           | 18                           | 251                           | 3.86                       | 11                            | 1                             | 12                           | 0.84                        |
| 11/16/02         | 0.01                          | 4                            | 2566                          | 214                           | 20                           | 265                           | 3.54                       | 14                            | 2                             | 13                           | 0.85                        |
| 12/16/02         | 0.01                          | 4                            | 2477                          | 215                           | 13                           | 249                           | 3.42                       | 14                            | 2                             | 25                           | -                           |
| 2/22/03          | 0.01                          | 4                            | 2392                          | 204                           | 16                           | 245                           | 3.31                       | 13                            | 2                             | 23                           | -                           |
| 3/23/03          | 0.01                          | 4                            | 2386                          | 201                           | 15                           | 244                           | 3.29                       | 6                             | 1                             | 27                           | -                           |
| 4/19/03          | 0.01                          | 4                            | 2433                          | 204                           | 10                           | 232                           | 3.32                       | 5                             | 1                             | 26                           | -                           |
| 5/20/03          | 0.01                          | 4                            | 2445                          | 199                           | 11                           | 238                           | 3.33                       | 5                             | 1                             | 27                           | -                           |
| 6/21/03          | 0.01                          | 4                            | 2441                          | 205                           | 11                           | 234                           | 3.33                       | 5                             | 1                             | 25                           | -                           |
| 7/23/03          | 0.01                          | 4                            | 2447                          | 202                           | 12                           | 234                           | 3.33                       | 4                             | 1                             | 26                           | -                           |
| 8/21/03          | 0.01                          | 4                            | 2386                          | 192                           | 11                           | 232                           | 3.24                       | 4                             | 1                             | 30                           | -                           |
| 9/23/03          | 0.01                          | 4                            | 2413                          | 193                           | 11                           | 230                           | 3.27                       | 5                             | 1                             | 31                           | -                           |
| 11/22/03         | 0.01                          | 4                            | 2567                          | 289                           | 32                           | 262                           | 3.70                       | 5                             | 1                             | 32                           | 0.79                        |
| 12/26/03         | 0.01                          | 4                            | 2576                          | 280                           | 33                           | 264                           | 3.70                       | 5                             | 1                             | 32                           | 0.78                        |
| 1/26/04          | 0.01                          | 4                            | 2558                          | 280                           | 34                           | 271                           | 3.69                       | 5                             | 1                             | 35                           | 0.78                        |
| 2/26/04          | 0.01                          | 4                            | 2544                          | 280                           | 34                           | 264                           | 3.66                       | 4                             | 1                             | 26                           | 0.79                        |

Table-7. Time series data for As and other ions in deep well at site A (depth - 43 m)

| Date of Sampling | As<br>( $\mu\text{moleL}^{-1}$ ) | P<br>( $\mu\text{moleL}^{-1}$ ) | Na<br>( $\mu\text{moleL}^{-1}$ ) | Mg<br>( $\mu\text{moleL}^{-1}$ ) | K<br>( $\mu\text{moleL}^{-1}$ ) | Ca<br>( $\mu\text{moleL}^{-1}$ ) | SMC<br>( $\text{meqL}^{-1}$ ) | Fe<br>( $\mu\text{moleL}^{-1}$ ) | Mn<br>( $\mu\text{moleL}^{-1}$ ) | S<br>( $\mu\text{moleL}^{-1}$ ) | Cl<br>( $\text{mmoleL}^{-1}$ ) |
|------------------|----------------------------------|---------------------------------|----------------------------------|----------------------------------|---------------------------------|----------------------------------|-------------------------------|----------------------------------|----------------------------------|---------------------------------|--------------------------------|
| 1/19/01          | 0.01                             | 6                               | 2225                             | 222                              | 29                              | 428                              | 3.55                          | 1                                | 2                                | 39                              | 0.86                           |
| 2/6/01           | 0.01                             | 7                               | 1781                             | 169                              | 18                              | 607                              | 3.35                          | 9                                | 2                                | 69                              | -                              |
| 2/19/01          | 0.01                             | 8                               | 1782                             | 182                              | 18                              | 626                              | 3.42                          | 36                               | 6                                | 50                              | -                              |
| 3/2/01           | 0.01                             | 8                               | 1827                             | 187                              | 20                              | 639                              | 3.50                          | 86                               | 9                                | 5                               | -                              |
| 3/17/01          | 0.01                             | 8                               | 1533                             | 164                              | 16                              | 393                              | 2.66                          | 93                               | 9                                | 5                               | -                              |
| 3/31/01          | 0.01                             | 8                               | 1601                             | 163                              | 19                              | 513                              | 2.97                          | 94                               | 9                                | 5                               | -                              |
| 4/14/01          | 0.01                             | 7                               | 1844                             | 189                              | 20                              | 482                              | 3.21                          | 39                               | 9                                | 5                               | -                              |
| 5/12/01          | 0.01                             | 8                               | 1810                             | 175                              | 19                              | 484                              | 3.15                          | 0                                | 12                               | 1                               | -                              |
| 5/26/01          | 0.01                             | 8                               | 1684                             | 163                              | 14                              | 464                              | 2.95                          | 103                              | 8                                | 5                               | -                              |
| 6/9/01           | 0.01                             | 7                               | 1652                             | 154                              | 18                              | 476                              | 2.93                          | 101                              | 8                                | 1                               | 0.84                           |
| 7/14/01          | 0.01                             | 8                               | 1677                             | 160                              | 13                              | 445                              | 2.90                          | 98                               | 8                                | 5                               | 0.81                           |
| 7/28/01          | 0.01                             | 8                               | 1723                             | 156                              | 18                              | 431                              | 2.92                          | 73                               | 8                                | 5                               | 0.84                           |
| 8/11/01          | 0.01                             | 7                               | 1751                             | 154                              | 17                              | 426                              | 2.93                          | 0                                | 0                                | 16                              | 0.86                           |
| 8/25/01          | 0.01                             | 7                               | 1835                             | 176                              | 21                              | 439                              | 3.08                          | 72                               | 7                                | 5                               | 0.89                           |
| 9/8/01           | 0.01                             | 7                               | 1690                             | 160                              | 16                              | 422                              | 2.87                          | 73                               | 7                                | 5                               | 0.91                           |
| 10/27/01         | 0.01                             | 7                               | 1755                             | 160                              | 16                              | 402                              | 2.90                          | 67                               | 7                                | 12                              | 0.93                           |
| 11/24/01         | 0.01                             | 7                               | 1871                             | 180                              | 19                              | 405                              | 3.06                          | 63                               | 7                                | 5                               | 0.95                           |
| 1/5/02           | 0.01                             | 7                               | 1786                             | 170                              | 19                              | 413                              | 2.97                          | 65                               | 7                                | 5                               | 0.99                           |
| 1/5/02           | 0.01                             | 8                               | 1777                             | 145                              | 18                              | 408                              | 2.90                          | 73                               | 7                                | 5                               | -                              |
| 3/30/02          | 0.01                             | 7                               | 1895                             | 150                              | 15                              | 392                              | 3.00                          | 65                               | 7                                | 8                               | -                              |
| 7/27/02          | 0.01                             | 8                               | 1474                             | 140                              | 19                              | 448                              | 2.67                          | 60                               | 7                                | 11                              | -                              |
| 8/31/02          | 0.01                             | 6                               | 1579                             | 147                              | 17                              | 409                              | 2.71                          | 61                               | 6                                | 12                              | -                              |
| 10/10/02         | 0.01                             | 6                               | 1781                             | 148                              | 20                              | 410                              | 2.92                          | 61                               | 6                                | 15                              | -                              |
| 11/16/02         | 0.01                             | 6                               | 1771                             | 143                              | 14                              | 379                              | 2.83                          | 56                               | 6                                | 12                              | -                              |
| 12/16/02         | 0.01                             | 6                               | 1730                             | 149                              | 15                              | 395                              | 2.83                          | 49                               | 6                                | 13                              | -                              |
| 2/22/03          | 0.01                             | 8                               | 1693                             | 147                              | 13                              | 379                              | 2.76                          | 32                               | 5                                | 25                              | -                              |
| 3/23/03          | 0.01                             | 8                               | 1755                             | 151                              | 14                              | 387                              | 2.85                          | 33                               | 5                                | 23                              | -                              |
| 4/19/03          | 0.01                             | 8                               | 1775                             | 215                              | 22                              | 467                              | 3.16                          | 90                               | 5                                | 27                              | -                              |
| 5/20/03          | 0.01                             | 8                               | 1861                             | 217                              | 24                              | 482                              | 3.28                          | 29                               | 4                                | 26                              | -                              |
| 6/21/03          | 0.01                             | 8                               | 1797                             | 224                              | 25                              | 476                              | 3.22                          | 28                               | 4                                | 27                              | -                              |
| 7/23/03          | 0.01                             | 8                               | 1926                             | 228                              | 24                              | 476                              | 3.36                          | 31                               | 4                                | 25                              | -                              |
| 8/21/03          | 0.01                             | 8                               | 1792                             | 210                              | 21                              | 453                              | 3.14                          | 28                               | 4                                | 26                              | -                              |
| 9/23/03          | 0.01                             | 7                               | 1723                             | 216                              | 25                              | 453                              | 3.09                          | 58                               | 6                                | 12                              | -                              |
| 11/22/03         | 0.01                             | 8                               | 1764                             | 212                              | 37                              | 450                              | 3.12                          | 26                               | 3                                | 34                              | -                              |
| 12/26/03         | 0.01                             | 7                               | 1708                             | 213                              | 36                              | 442                              | 3.05                          | 25                               | 3                                | 37                              | -                              |
| 1/26/04          | 0.01                             | 8                               | 1723                             | 212                              | 36                              | 444                              | 3.07                          | 27                               | 3                                | 36                              | -                              |
| 2/26/04          | 0.01                             | 8                               | 1682                             | 206                              | 36                              | 450                              | 3.03                          | 24                               | 3                                | 37                              | -                              |

Table-8. Time series data for As and other ions in shallow well at site A (depth - 91 m)

| Date of Sampling | As<br>( $\mu\text{moleL}^{-1}$ ) | P<br>( $\mu\text{moleL}^{-1}$ ) | Na<br>( $\mu\text{moleL}^{-1}$ ) | Mg<br>( $\mu\text{moleL}^{-1}$ ) | K<br>( $\mu\text{moleL}^{-1}$ ) | Ca<br>( $\mu\text{moleL}^{-1}$ ) | SMC<br>( $\text{meqL}^{-1}$ ) | Fe<br>( $\mu\text{moleL}^{-1}$ ) | Mn<br>( $\mu\text{moleL}^{-1}$ ) | S<br>( $\mu\text{moleL}^{-1}$ ) | Cl<br>( $\text{mmoleL}^{-1}$ ) |
|------------------|----------------------------------|---------------------------------|----------------------------------|----------------------------------|---------------------------------|----------------------------------|-------------------------------|----------------------------------|----------------------------------|---------------------------------|--------------------------------|
| 1/5/02           | 0.02                             | 10                              | 2029                             | 496                              | 47                              | 615                              | 4.30                          | -                                | -                                | -                               | 1.44                           |
| 3/30/02          | 0.02                             | 10                              | 1954                             | 399                              | 39                              | 637                              | 4.07                          | -                                | -                                | -                               | 1.44                           |
| 4/27/02          | 0.02                             | 9                               | 2216                             | 200                              | 30                              | 439                              | 3.53                          | -                                | 2                                | -                               | 1.34                           |
| 5/27/02          | 0.02                             | 9                               | 2139                             | 207                              | 32                              | 434                              | 3.45                          | -                                | 1                                | -                               | 1.33                           |
| 6/30/02          | 0.02                             | 10                              | 2200                             | 419                              | 35                              | 586                              | 4.25                          | 277                              | 2                                | -                               | 1.47                           |
| 7/27/02          | 0.02                             | 9                               | 2167                             | 417                              | 36                              | 587                              | 4.21                          | 211                              | 2                                | -                               | 1.47                           |
| 8/31/02          | 0.02                             | 11                              | 1968                             | 417                              | 36                              | 591                              | 4.02                          | 324                              | 2                                | -                               | 1.47                           |
| 10/10/02         | 0.02                             | 11                              | 1997                             | 423                              | 33                              | 552                              | 3.98                          | 330                              | 2                                | -                               | 1.47                           |
| 11/16/02         | 0.02                             | 9                               | 2312                             | 429                              | 36                              | 594                              | 4.39                          | 275                              | 2                                | -                               | 1.49                           |
| 12/16/02         | 0.02                             | 11                              | 1718                             | 423                              | 40                              | 641                              | 3.89                          | 301                              | 3                                | -                               | 1.50                           |
| 2/22/03          | 0.02                             | 11                              | 1669                             | 407                              | 34                              | 626                              | 3.77                          | 182                              | 3                                | 18                              | -                              |
| 3/23/03          | 0.02                             | 10                              | 1466                             | 377                              | 34                              | 603                              | 3.46                          | 130                              | 3                                | 24                              | -                              |
| 4/19/03          | 0.02                             | 11                              | 1643                             | 414                              | 39                              | 587                              | 3.68                          | 163                              | 4                                | 29                              | -                              |
| 5/20/03          | 0.02                             | 9                               | 1702                             | 417                              | 30                              | 612                              | 3.79                          | -                                | 3                                | 27                              | -                              |
| 6/21/03          | 0.02                             | 11                              | 1637                             | 409                              | 31                              | 592                              | 3.67                          | 137                              | 3                                | 32                              | -                              |
| 7/23/03          | 0.02                             | 10                              | 1681                             | 433                              | 31                              | 586                              | 3.75                          | 194                              | 3                                | 28                              | -                              |
| 8/21/03          | 0.02                             | 10                              | 1565                             | 390                              | 34                              | 602                              | 3.58                          | 202                              | 3                                | 26                              | -                              |
| 9/23/03          | 0.02                             | 11                              | 1852                             | 452                              | 42                              | 632                              | 4.06                          | 341                              | 3                                | 8                               | -                              |
| 11/22/03         | 0.02                             | 8                               | 1583                             | 408                              | 44                              | 563                              | 3.57                          | 71                               | 2                                | 39                              | 1.43                           |
| 12/26/03         | 0.02                             | 9                               | 1549                             | 390                              | 43                              | 568                              | 3.51                          | -                                | 2                                | 36                              | 1.43                           |
| 1/26/04          | 0.02                             | 10                              | 1535                             | 392                              | 43                              | 579                              | 3.52                          | -                                | 2                                | 39                              | 1.44                           |
| 2/26/04          | 0.02                             | 9                               | 1533                             | 395                              | 44                              | 575                              | 3.52                          | -                                | 2                                | 37                              | 1.44                           |

Table-9a. Time series water level data (m) for shallow and deep wells at site A (1/2001-1/2002)

| Date of<br>Measurement | Wells at different depths |      |      |      |      |      |      |      |
|------------------------|---------------------------|------|------|------|------|------|------|------|
|                        | 7 m                       | 10 m | 13 m | 15 m | 30 m | 37 m | 43 m | 91 m |
| 1/27/2001              | 3.3                       | 3.2  | 3.3  | 3.2  | 2.6  | 2.6  | 2.6  | x    |
| 2/6/2001               | 3.0                       | 3.1  | 3.1  | 3.0  | 2.2  | 2.2  | 2.2  | x    |
| 2/11/2001              | 3.0                       | 3.1  | 3.0  | 2.9  | 2.1  | 2.1  | 2.1  | x    |
| 2/19/2001              | 2.4                       | 2.4  | 2.4  | 2.4  | 1.4  | 1.4  | 1.4  | x    |
| 2/24/2001              | 2.4                       | 2.4  | 2.4  | 2.4  | 1.5  | 1.5  | 1.4  | x    |
| 3/2/2001               | 2.4                       | 2.4  | 2.3  | 2.3  | 1.2  | 1.2  | 1.2  | x    |
| 3/10/2001              | 2.3                       | 2.3  | 2.3  | 2.3  | 1.2  | 1.2  | 1.2  | x    |
| 3/17/2001              | 2.3                       | 2.3  | 2.3  | 2.3  | 0.9  | 0.9  | 0.9  | x    |
| 3/24/2001              | 2.3                       | 2.3  | 2.2  | 2.2  | 1.0  | 1.0  | 0.9  | x    |
| 3/31/2001              | 2.3                       | 2.3  | 2.3  | 2.3  | 1.0  | 1.0  | 1.0  | x    |
| 4/7/2001               | 2.6                       | 2.6  | 2.6  | 2.6  | 0.9  | 0.9  | 0.8  | x    |
| 4/14/2001              | 2.6                       | 2.6  | 2.6  | 2.6  | 0.7  | 0.7  | 0.7  | x    |
| 4/21/2001              | 2.7                       | 2.7  | 2.7  | 2.7  | 0.9  | 0.9  | 0.9  | x    |
| 4/28/2001              | 2.8                       | 2.8  | 2.8  | 2.8  | 0.9  | 0.9  | 0.9  | x    |
| 5/5/2001               | 2.9                       | 2.9  | 2.9  | 2.9  | 1.1  | 1.1  | 1.1  | x    |
| 5/12/2001              | 3.6                       | 3.6  | 3.6  | 3.6  | 1.6  | 1.6  | 1.6  | x    |
| 5/19/2001              | 3.7                       | 3.7  | 3.7  | 3.7  | 1.9  | 1.9  | 1.9  | x    |
| 5/26/2001              | 3.8                       | 3.7  | 3.7  | 3.7  | 2.2  | 2.2  | 2.2  | x    |
| 6/2/2001               | 3.8                       | 3.8  | 3.8  | 3.8  | 2.4  | 2.4  | 2.4  | x    |
| 6/9/2001               | 4.6                       | 4.6  | 4.6  | 4.6  | 2.8  | 2.8  | 2.8  | x    |
| 6/30/2001              | 5.2                       | 5.2  | 5.2  | 5.2  | 3.8  | 3.8  | 3.8  | x    |
| 7/7/2001               | 5.2                       | 5.2  | 5.2  | 5.2  | 3.9  | 3.9  | 3.9  | x    |
| 7/14/2001              | 5.3                       | 5.3  | 5.3  | 5.3  | 4.0  | 4.0  | 4.0  | x    |
| 7/21/2001              | 5.4                       | 5.4  | 5.4  | 5.4  | 4.1  | 4.1  | 4.1  | x    |
| 7/28/2001              | 5.6                       | 5.6  | 5.6  | 5.6  | 4.3  | 4.3  | 4.3  | x    |
| 8/4/2001               | 5.9                       | 5.9  | 5.9  | 5.8  | 4.6  | 4.6  | 4.5  | x    |
| 8/11/2001              | 6.3                       | 6.3  | 6.3  | 6.3  | 5.0  | 5.0  | 5.0  | x    |
| 8/18/2001              | 6.2                       | 6.2  | 6.2  | 6.2  | 4.9  | 4.9  | 4.9  | x    |
| 8/25/2001              | 6.0                       | 6.0  | 6.0  | 6.0  | 4.8  | 4.8  | 4.8  | x    |
| 9/1/2001               | 6.0                       | 6.1  | 6.0  | 6.0  | 5.0  | 5.0  | 5.0  | x    |
| 9/8/2001               | 6.2                       | 6.2  | 6.2  | 6.2  | 5.1  | 5.1  | 5.1  | x    |
| 9/15/2001              | 6.1                       | 6.1  | 6.1  | 6.1  | 5.0  | 5.0  | 5.0  | x    |
| 9/22/2001              | 6.2                       | 6.2  | 6.2  | 6.2  | 5.1  | 5.1  | 5.1  | x    |
| 9/28/2001              | 5.9                       | 5.9  | 5.9  | 5.9  | 5.0  | 5.0  | 4.9  | x    |
| 10/6/2001              | 5.7                       | 5.7  | 5.7  | 5.7  | 4.9  | 4.9  | 4.9  | x    |
| 10/13/2001             | 5.6                       | 5.6  | 5.6  | 5.6  | 4.8  | 4.8  | 4.8  | x    |
| 10/20/2001             | 5.8                       | 5.8  | 5.8  | 5.8  | 4.9  | 4.9  | 4.9  | x    |
| 10/27/2001             | 5.4                       | 5.4  | 5.4  | 5.4  | 4.6  | 4.6  | 4.6  | x    |
| 11/3/2001              | 5.2                       | 5.2  | 5.1  | 5.2  | 4.5  | 4.5  | 4.5  | x    |
| 11/10/2001             | 4.9                       | 4.9  | 4.9  | 4.9  | 4.4  | 4.4  | 4.4  | x    |
| 11/17/2001             | 4.5                       | 4.5  | 4.5  | 4.5  | 4.2  | 4.2  | 4.2  | x    |
| 11/24/2001             | 4.0                       | 4.0  | 4.0  | 4.0  | 4.0  | 4.0  | 4.0  | x    |
| 12/1/2001              | 3.8                       | 3.7  | 3.7  | 3.7  | 3.9  | 3.9  | 3.9  | x    |
| 12/8/2001              | 3.5                       | 3.5  | 3.5  | 3.5  | 3.7  | 3.7  | 3.7  | x    |
| 12/29/2001             | 3.1                       | 3.1  | 3.1  | 3.1  | 3.5  | 3.5  | 3.4  | x    |
| 1/5/2002               | 3.1                       | 3.1  | 3.1  | 3.1  | 3.3  | 3.3  | 3.3  | x    |
| 1/12/2002              | 3.0                       | 3.0  | 3.0  | 3.0  | 3.1  | 3.1  | 3.1  | x    |

x Well was not accessible due to public use

**Table-9b. Time series water level data (m) for shallow and deep wells at site A (2/2002-2/2004)**

| Date of<br>Measurement | Wells at different depths |      |      |      |      |      |      |      |
|------------------------|---------------------------|------|------|------|------|------|------|------|
|                        | 7 m                       | 10 m | 13 m | 15 m | 30 m | 37 m | 43 m | 91 m |
| 2/18/2002              | 2.4                       | 2.4  | 2.4  | 2.4  | 1.4  | 1.4  | 1.4  | x    |
| 3/16/2002              | 2.6                       | 2.6  | 2.6  | 2.7  | 1.0  | 1.0  | 1.0  | 1.1  |
| 3/30/2002              | 3.0                       | 3.0  | 3.0  | 3.0  | 1.4  | 1.4  | 1.4  | 1.5  |
| 4/13/2002              | 3.2                       | 3.2  | 3.2  | 3.2  | 1.7  | 1.7  | 1.7  | 1.5  |
| 4/27/2002              | 3.2                       | 3.2  | 3.2  | 3.2  | 1.3  | 1.3  | 1.3  | 1.5  |
| 5/12/2002              | 4.0                       | 4.0  | 4.0  | 4.0  | 2.2  | 2.2  | 2.2  | 2.3  |
| 5/27/2002              | 4.3                       | 4.3  | 4.3  | 4.3  | 2.6  | 2.6  | 2.6  | 2.8  |
| 6/8/2002               | 4.6                       | 4.6  | 4.6  | 4.6  | 3.1  | 3.1  | 3.1  | 3.2  |
| 6/15/2002              | 5.0                       | 5.0  | 5.0  | 5.0  | 3.3  | 3.3  | 3.3  | 3.4  |
| 6/30/2002              | 5.8                       | 5.8  | 5.8  | 5.8  | 4.1  | 4.1  | 4.1  | 4.2  |
| 7/14/2002              | 6.2                       | 6.2  | 6.2  | 6.2  | 4.7  | 4.7  | 4.7  | 4.2  |
| 7/27/2002              | 6.3                       | 6.3  | 6.3  | 6.3  | 4.9  | 4.9  | 4.9  | 5.0  |
| 8/7/2002               | 6.8                       | 6.8  | 6.8  | 6.8  | 5.4  | 5.4  | 5.3  | 5.5  |
| 8/31/2002              | 6.4                       | 6.4  | 6.4  | 6.4  | 5.2  | 5.2  | 5.2  | 5.5  |
| 9/15/2002              | 5.5                       | 5.5  | 5.5  | 5.5  | 4.6  | 4.6  | 4.6  | 4.8  |
| 10/11/2002             | 5.4                       | 5.4  | 5.4  | 5.4  | 4.4  | 4.4  | 4.4  | 4.4  |
| 11/16/2002             | 4.6                       | 4.6  | 4.6  | 4.6  | 3.8  | 3.8  | 3.8  | 3.9  |
| 12/3/2002              | 3.5                       | 3.5  | 3.5  | 3.5  | 3.6  | 3.6  | 3.6  | 3.7  |
| 12/16/2002             | 3.3                       | 3.3  | 3.3  | 3.3  | 3.5  | 3.5  | 3.5  | 3.6  |
| 1/14/2003              | 2.9                       | 2.9  | 2.9  | 2.9  | 2.5  | 2.5  | 2.8  | 2.7  |
| 2/1/2003               | 2.6                       | 2.6  | 2.6  | 2.6  | 1.6  | 1.6  | 1.6  | 1.8  |
| 2/15/2003              | 2.6                       | 2.6  | 2.6  | 2.6  | 1.6  | 1.6  | 1.6  | 1.7  |
| 3/2/2003               | 2.7                       | 2.7  | 2.7  | 2.7  | 1.0  | 1.0  | 1.0  | 1.2  |
| 3/15/2003              | 2.6                       | 2.6  | 2.6  | 2.6  | 1.0  | 1.0  | 1.0  | 1.1  |
| 3/31/2003              | 3.0                       | 3.0  | 3.0  | 3.0  | 1.3  | 1.3  | 1.3  | 1.5  |
| 4/12/2003              | 3.2                       | 3.2  | 3.2  | 3.2  | 1.3  | 1.3  | 1.3  | 1.5  |
| 4/26/2003              | 3.3                       | 3.3  | 3.3  | 3.3  | 1.4  | 1.4  | 1.4  | 1.5  |
| 5/11/2003              | 3.7                       | 3.7  | 3.7  | 3.7  | 2.0  | 2.0  | 2.0  | 2.1  |
| 5/24/2003              | 3.8                       | 3.8  | 3.8  | 3.8  | 2.1  | 2.1  | 2.1  | 2.3  |
| 6/7/2003               | 4.1                       | 4.1  | 4.1  | 4.1  | 2.4  | 2.4  | 2.4  | 2.5  |
| 6/24/2003              | 5.5                       | 5.4  | 5.4  | 5.4  | 3.3  | 3.3  | 3.3  | 3.5  |
| 7/8/2003               | 6.0                       | 6.0  | 6.0  | 6.0  | 4.2  | 4.2  | 4.2  | 4.3  |
| 7/22/2003              | 6.9                       | 6.8  | 6.8  | 6.8  | 5.0  | 5.0  | 5.0  | 5.1  |
| 8/5/2003               | 6.5                       | 6.5  | 6.5  | 6.5  | 4.8  | 4.8  | 4.8  | 5.0  |
| 8/21/2003              | 6.1                       | 6.1  | 6.1  | 6.1  | 4.7  | 4.7  | 4.7  | 4.9  |
| 9/3/2003               | 6.3                       | 6.3  | 6.3  | 6.3  | 4.9  | 4.9  | 4.9  | 5.0  |
| 9/18/2003              | 6.2                       | 6.2  | 6.2  | 6.2  | 4.9  | 4.9  | 4.9  | 5.0  |
| 10/1/2003              | 6.3                       | 6.3  | 6.3  | 6.3  | 4.9  | 4.9  | 4.9  | 5.1  |
| 10/23/2003             | 5.6                       | 5.6  | 5.6  | 5.6  | 4.5  | 4.5  | 4.4  | 4.6  |
| 11/9/2003              | 4.9                       | 4.9  | 4.9  | 4.9  | 4.1  | 4.1  | 4.1  | 4.3  |
| 11/23/2003             | 4.0                       | 4.0  | 4.0  | 4.0  | 3.7  | 3.7  | 3.7  | 3.9  |
| 12/10/2003             | 3.5                       | 3.5  | 3.5  | 3.5  | 3.5  | 3.5  | 3.5  | 3.6  |
| 12/25/2003             | 3.4                       | 3.4  | 3.4  | 3.4  | 3.2  | 3.2  | 3.2  | 3.3  |
| 1/1/2004               | 3.0                       | 3.0  | 3.0  | 3.0  | 2.8  | 2.8  | 2.8  | 3.0  |
| 1/25/2004              | 2.9                       | 2.9  | 2.9  | 2.9  | 2.0  | 2.0  | 2.0  | 2.1  |
| 2/16/2004              | 2.7                       | 2.7  | 2.7  | 2.7  | 1.1  | 1.1  | 1.1  | 1.2  |
| 2/27/2004              | 2.7                       | 2.7  | 2.7  | 2.7  | 1.1  | 1.1  | 1.1  | 1.2  |

x Well was not accessible due to public use

Table-10. Time series data for As and other ions in shallow well at site B (depth - 7 m)

| Date of Sampling | As<br>( $\mu\text{moleL}^{-1}$ ) | P<br>( $\mu\text{moleL}^{-1}$ ) | Na<br>( $\mu\text{moleL}^{-1}$ ) | Mg<br>( $\mu\text{moleL}^{-1}$ ) | K<br>( $\mu\text{moleL}^{-1}$ ) | Ca<br>( $\mu\text{moleL}^{-1}$ ) | SMC<br>( $\text{meqL}^{-1}$ ) | Fe<br>( $\mu\text{moleL}^{-1}$ ) | Mn<br>( $\mu\text{moleL}^{-1}$ ) | S<br>( $\mu\text{moleL}^{-1}$ ) | Cl<br>( $\text{mmoleL}^{-1}$ ) |
|------------------|----------------------------------|---------------------------------|----------------------------------|----------------------------------|---------------------------------|----------------------------------|-------------------------------|----------------------------------|----------------------------------|---------------------------------|--------------------------------|
| 5/12/01          | 0.57                             | 106                             | 2725                             | 1563                             | 219                             | 2688                             | 11.45                         | 690                              | 19                               | 633                             | -                              |
| 5/26/01          | 0.50                             | 76                              | 2236                             | 1650                             | 195                             | 2590                             | 10.91                         | 411                              | 31                               | 576                             | -                              |
| 6/9/01           | 0.54                             | 96                              | 2419                             | 1429                             | 137                             | 2584                             | 10.58                         | 363                              | 21                               | 531                             | -                              |
| 6/20/01          | 0.50                             | 91                              | 3070                             | 1799                             | 152                             | 2778                             | 12.38                         | 234                              | 9                                | 463                             | 4.64                           |
| 7/14/01          | 0.42                             | 55                              | 2017                             | 2085                             | 186                             | 2368                             | 11.11                         | 388                              | 22                               | 561                             | 3.91                           |
| 8/11/01          | 0.41                             | 46                              | 1634                             | 1976                             | 185                             | 2499                             | 10.77                         | 348                              | 19                               | 633                             | 3.99                           |
| 8/25/01          | 0.44                             | 50                              | 1611                             | 1946                             | 184                             | 2506                             | 10.70                         | 361                              | 20                               | 654                             | 4.06                           |
| 9/8/01           | 0.42                             | 49                              | 1657                             | 2046                             | 187                             | 2456                             | 10.85                         | 370                              | 18                               | 641                             | 4.16                           |
| 9/28/01          | 0.46                             | 45                              | 1659                             | 2010                             | 192                             | 2499                             | 10.87                         | 374                              | 18                               | 715                             | 4.24                           |
| 10/27/01         | 0.41                             | 44                              | 1766                             | 2289                             | 198                             | 2882                             | 12.31                         | 375                              | 18                               | 957                             | 5.11                           |
| 11/24/01         | 0.41                             | 48                              | 2129                             | 2499                             | 199                             | 3360                             | 14.04                         | 379                              | 20                               | 990                             | 5.28                           |
| 1/5/02           | 0.42                             | 53                              | 2003                             | 2272                             | 191                             | 2995                             | 12.73                         | 386                              | 21                               | 1073                            | 4.61                           |
| 3/30/02          | 0.36                             | 37                              | 2227                             | 1871                             | 150                             | 2809                             | 11.74                         | 386                              | 14                               | 1164                            | 4.66                           |
| 7/27/02          | 0.33                             | 42                              | 2471                             | 1993                             | 153                             | 3098                             | 12.81                         | 564                              | 18                               | 910                             | 4.27                           |
| 8/31/02          | 0.31                             | 39                              | 2485                             | 2108                             | 143                             | 2818                             | 12.48                         | 561                              | 18                               | 828                             | 4.41                           |
| 10/10/02         | 0.38                             | 43                              | 2472                             | 2328                             | 150                             | 3293                             | 13.86                         | 597                              | 20                               | 802                             | 4.69                           |
| 11/16/02         | 0.33                             | 39                              | 2299                             | 2222                             | 150                             | 3319                             | 13.53                         | 587                              | 20                               | 827                             | 4.60                           |
| 12/16/02         | 0.33                             | 45                              | 2234                             | 2439                             | 198                             | 2793                             | 12.90                         | 464                              | 16                               | 673                             | 4.60                           |
| 2/22/03          | 0.28                             | 46                              | 2160                             | 2255                             | 184                             | 2585                             | 12.03                         | 407                              | 15                               | 591                             | 4.47                           |
| 3/23/03          | 0.29                             | 39                              | 2169                             | 2281                             | 194                             | 2674                             | 12.27                         | 401                              | 14                               | 722                             | 4.26                           |
| 4/19/03          | 0.32                             | 56                              | 3171                             | 2112                             | 200                             | 2720                             | 13.03                         | 417                              | 15                               | 607                             | 4.13                           |
| 5/20/03          | 0.45                             | 82                              | 3040                             | 2121                             | 196                             | 3047                             | 13.57                         | 532                              | 15                               | 659                             | -                              |
| 6/21/03          | 0.39                             | 76                              | 2937                             | 2049                             | 176                             | 2781                             | 12.77                         | 470                              | 17                               | 570                             | -                              |
| 7/23/03          | 0.42                             | 75                              | 2829                             | 2005                             | 181                             | 2746                             | 12.51                         | 478                              | 18                               | 566                             | -                              |
| 8/21/03          | 0.45                             | 64                              | 2462                             | 1794                             | 169                             | 2462                             | 11.14                         | 409                              | 17                               | 470                             | -                              |
| 9/23/03          | 0.44                             | 73                              | 2810                             | 1913                             | 182                             | 2551                             | 11.92                         | 450                              | 13                               | 510                             | -                              |
| 11/22/03         | 0.32                             | 48                              | 1284                             | 1863                             | 180                             | 2125                             | 9.44                          | 370                              | 13                               | 542                             | 3.73                           |
| 12/26/03         | 0.29                             | 56                              | 1155                             | 1861                             | 181                             | 2199                             | 9.46                          | 375                              | 13                               | 424                             | 3.58                           |
| 1/26/04          | 0.35                             | 53                              | 1153                             | 1862                             | 188                             | 2172                             | 9.41                          | 371                              | 13                               | 481                             | 3.63                           |
| 2/26/04          | 0.29                             | 49                              | 1279                             | 2017                             | 193                             | 2193                             | 9.89                          | 374                              | 14                               | 528                             | 4.16                           |

Table-11. Time series data for As and other ions in shallow well at site B (depth - 11 m)

| Date of Sampling | As<br>( $\mu\text{moleL}^{-1}$ ) | P<br>( $\mu\text{moleL}^{-1}$ ) | Na<br>( $\mu\text{moleL}^{-1}$ ) | Mg<br>( $\mu\text{moleL}^{-1}$ ) | K<br>( $\mu\text{moleL}^{-1}$ ) | Ca<br>( $\mu\text{moleL}^{-1}$ ) | SMC<br>( $\text{meqL}^{-1}$ ) | Fe<br>( $\mu\text{moleL}^{-1}$ ) | Mn<br>( $\mu\text{moleL}^{-1}$ ) | S<br>( $\mu\text{moleL}^{-1}$ ) | Cl<br>( $\text{mmoleL}^{-1}$ ) |
|------------------|----------------------------------|---------------------------------|----------------------------------|----------------------------------|---------------------------------|----------------------------------|-------------------------------|----------------------------------|----------------------------------|---------------------------------|--------------------------------|
| 5/12/01          | 2.88                             | 38                              | 1856                             | 1218                             | 167                             | 1983                             | 8.42                          | 233                              | 31                               | 257                             | -                              |
| 5/26/01          | 3.33                             | 41                              | 1741                             | 1751                             | 179                             | 2995                             | 11.41                         | 211                              | 48                               | 299                             | -                              |
| 6/9/01           | 3.34                             | 44                              | 1520                             | 1739                             | 173                             | 3059                             | 11.29                         | 229                              | 48                               | 245                             | -                              |
| 6/20/01          | 4.87                             | 42                              | 1520                             | 1739                             | 173                             | 3059                             | 11.29                         | 153                              | 39                               | 239                             | 3.00                           |
| 7/14/01          | 4.42                             | 52                              | 1671                             | 1644                             | 150                             | 2942                             | 10.99                         | 252                              | 45                               | 281                             | 3.27                           |
| 7/28/01          | 4.37                             | 54                              | 1619                             | 1565                             | 151                             | 2973                             | 10.84                         | 244                              | 47                               | 281                             | 3.23                           |
| 8/11/01          | 4.43                             | 57                              | 1765                             | 1630                             | 147                             | 2945                             | 11.06                         | 267                              | 48                               | 299                             | 3.31                           |
| 8/25/01          | 4.92                             | 57                              | 1819                             | 1660                             | 148                             | 3021                             | 11.33                         | 253                              | 50                               | 333                             | 3.39                           |
| 9/8/01           | 4.78                             | 58                              | 1821                             | 1638                             | 146                             | 2983                             | 11.21                         | 268                              | 49                               | 321                             | 3.34                           |
| 9/28/01          | 4.67                             | 49                              | 1818                             | 1634                             | 145                             | 2936                             | 11.10                         | 278                              | 47                               | 281                             | 3.27                           |
| 10/27/01         | 4.67                             | 57                              | 1683                             | 1601                             | 141                             | 2922                             | 10.87                         | 264                              | 47                               | 262                             | 3.25                           |
| 11/24/01         | 4.53                             | 56                              | 1584                             | 1584                             | 137                             | 2846                             | 10.58                         | 265                              | 46                               | 231                             | 2.99                           |
| 1/5/02           | 4.70                             | 52                              | 1375                             | 1528                             | 130                             | 2723                             | 10.01                         | 256                              | 42                               | 188                             | 2.92                           |
| 3/30/02          | 4.57                             | 69                              | 2844                             | 1726                             | 186                             | 3430                             | 13.34                         | 724                              | 36                               | 427                             | 3.26                           |
| 7/27/02          | 4.60                             | 75                              | 2714                             | 1798                             | 183                             | 3414                             | 13.32                         | 758                              | 37                               | 420                             | 4.01                           |
| 8/31/02          | 4.00                             | 47                              | 2816                             | 1681                             | 178                             | 3216                             | 12.79                         | 675                              | 36                               | 369                             | 4.06                           |
| 10/10/02         | 3.88                             | 54                              | 2637                             | 1738                             | 162                             | 2903                             | 12.08                         | 689                              | 34                               | 341                             | 4.00                           |
| 11/16/02         | 3.79                             | 59                              | 2611                             | 1659                             | 163                             | 2997                             | 12.08                         | 566                              | 35                               | 259                             | 3.84                           |
| 12/16/02         | 3.08                             | 51                              | 2460                             | 1599                             | 166                             | 2868                             | 11.56                         | 546                              | 32                               | 201                             | 3.46                           |
| 3/23/03          | 3.23                             | 54                              | 2362                             | 1703                             | 164                             | 3051                             | 12.03                         | 562                              | 35                               | 412                             | 3.65                           |
| 4/19/03          | 3.86                             | 60                              | 2825                             | 1774                             | 170                             | 3217                             | 12.98                         | 503                              | 39                               | 568                             | 3.82                           |
| 5/20/03          | 4.17                             | 58                              | 2795                             | 1825                             | 171                             | 3256                             | 13.13                         | 517                              | 38                               | 542                             | 4.03                           |
| 6/21/03          | 3.71                             | 59                              | 2715                             | 1811                             | 172                             | 3301                             | 13.11                         | 551                              | 38                               | 579                             | -                              |
| 7/23/03          | 3.73                             | 60                              | 2718                             | 1785                             | 177                             | 3370                             | 13.21                         | 543                              | 38                               | 566                             | -                              |
| 8/21/03          | 3.23                             | 65                              | 2710                             | 1787                             | 176                             | 3349                             | 13.16                         | 618                              | 37                               | 513                             | -                              |
| 9/23/03          | 3.49                             | 61                              | 2835                             | 1789                             | 171                             | 3273                             | 13.13                         | 519                              | 37                               | 497                             | -                              |
| 11/22/03         | 3.49                             | 65                              | 2831                             | 1795                             | 168                             | 3197                             | 12.98                         | 563                              | 37                               | 391                             | 4.05                           |
| 12/26/03         | 3.87                             | 62                              | 2638                             | 1724                             | 168                             | 3434                             | 13.12                         | 450                              | 36                               | 325                             | 3.72                           |
| 1/26/04          | 3.49                             | 62                              | 2554                             | 1553                             | 162                             | 2864                             | 11.55                         | 451                              | 33                               | 216                             | 3.35                           |
| 2/26/04          | 2.89                             | 64                              | 2729                             | 1726                             | 162                             | 3034                             | 12.41                         | 526                              | 31                               | 353                             | 3.52                           |



Table-12. Time series data for As and other ions in shallow well at site B (depth - 14 m)

| Date of Sampling | As<br>( $\mu\text{moleL}^{-1}$ ) | P<br>( $\mu\text{moleL}^{-1}$ ) | Na<br>( $\mu\text{moleL}^{-1}$ ) | Mg<br>( $\mu\text{moleL}^{-1}$ ) | K<br>( $\mu\text{moleL}^{-1}$ ) | Ca<br>( $\mu\text{moleL}^{-1}$ ) | SMC<br>( $\text{meqL}^{-1}$ ) | Fe<br>( $\mu\text{moleL}^{-1}$ ) | Mn<br>( $\mu\text{moleL}^{-1}$ ) | S<br>( $\mu\text{moleL}^{-1}$ ) | Cl<br>( $\text{mmoleL}^{-1}$ ) |
|------------------|----------------------------------|---------------------------------|----------------------------------|----------------------------------|---------------------------------|----------------------------------|-------------------------------|----------------------------------|----------------------------------|---------------------------------|--------------------------------|
| 2/6/01           | 6.16                             | 42                              | 1335                             | 1263                             | 129                             | 2854                             | 9.70                          | 340                              | 30                               | 199                             | -                              |
| 2/19/01          | 6.35                             | 42                              | 1342                             | 1267                             | 126                             | 2830                             | 9.66                          | 328                              | 30                               | 156                             | -                              |
| 3/17/01          | 9.59                             | 50                              | 1495                             | 1463                             | 123                             | 3552                             | 11.65                         | 470                              | 34                               | 343                             | -                              |
| 3/31/01          | 9.93                             | 56                              | 1612                             | 1554                             | 123                             | 3707                             | 12.26                         | 496                              | 34                               | 415                             | -                              |
| 4/14/01          | 6.61                             | 34                              | 1311                             | 1407                             | 119                             | 3192                             | 10.63                         | 336                              | 26                               | 263                             | -                              |
| 4/28/01          | 7.03                             | 40                              | 1600                             | 1551                             | 125                             | 3336                             | 11.50                         | 353                              | 26                               | 297                             | -                              |
| 5/12/01          | 8.68                             | 54                              | 1747                             | 1533                             | 122                             | 3262                             | 11.46                         | 463                              | 25                               | 340                             | -                              |
| 5/26/01          | 7.24                             | 50                              | 1578                             | 1451                             | 125                             | 3243                             | 11.09                         | 432                              | 24                               | 326                             | -                              |
| 6/9/01           | 6.97                             | 52                              | 1629                             | 1411                             | 126                             | 3149                             | 10.87                         | 412                              | 23                               | 273                             | -                              |
| 6/20/01          | 7.40                             | 47                              | 2033                             | 1666                             | 151                             | 2959                             | 11.44                         | 257                              | 23                               | 207                             | 3.66                           |
| 7/14/01          | 6.12                             | 51                              | 1610                             | 1217                             | 122                             | 2827                             | 9.82                          | 344                              | 21                               | 168                             | 3.67                           |
| 7/28/01          | 6.55                             | 46                              | 1620                             | 1405                             | 130                             | 3183                             | 10.93                         | 386                              | 24                               | 281                             | 4.24                           |
| 8/11/01          | 6.60                             | 45                              | 1726                             | 1435                             | 123                             | 2939                             | 10.60                         | 362                              | 23                               | 264                             | 4.31                           |
| 8/25/01          | 6.78                             | 46                              | 1612                             | 1310                             | 126                             | 2827                             | 10.01                         | 346                              | 22                               | 246                             | 4.21                           |
| 9/8/01           | 6.59                             | 45                              | 1609                             | 1287                             | 127                             | 2752                             | 9.82                          | 336                              | 20                               | 226                             | 4.22                           |
| 9/28/01          | 6.66                             | 43                              | 1565                             | 1178                             | 123                             | 2572                             | 9.19                          | 323                              | 20                               | 185                             | 4.16                           |
| 10/27/01         | 6.63                             | 42                              | 1505                             | 1204                             | 126                             | 2537                             | 9.11                          | 312                              | 20                               | 133                             | 4.15                           |
| 11/24/01         | 6.44                             | 39                              | 1524                             | 1184                             | 127                             | 2501                             | 9.02                          | 303                              | 21                               | 116                             | 4.35                           |
| 1/5/02           | 6.57                             | 39                              | 2430                             | 1516                             | 83                              | 2400                             | 10.34                         | 359                              | 24                               | 194                             | 5.45                           |
| 6/30/02          | 8.58                             | 71                              | 1914                             | 1039                             | 122                             | 2413                             | 8.94                          | 494                              | 16                               | 88                              | 3.56                           |
| 7/27/02          | 7.78                             | 65                              | 1862                             | 1012                             | 115                             | 2690                             | 8.58                          | 473                              | 16                               | 78                              | 3.64                           |
| 8/31/02          | 7.82                             | 64                              | 1876                             | 988                              | 119                             | 2714                             | 8.80                          | 451                              | 16                               | 73                              | 3.70                           |
| 10/10/02         | 7.76                             | 59                              | 1887                             | 1022                             | 120                             | 2676                             | 8.80                          | 432                              | 17                               | 74                              | 3.89                           |
| 11/16/02         | 7.01                             | 52                              | 1986                             | 1100                             | 131                             | 2861                             | 9.44                          | 432                              | 19                               | 143                             | 4.36                           |
| 12/16/02         | 7.14                             | 50                              | 2035                             | 1109                             | 129                             | 2828                             | 9.44                          | 457                              | 20                               | 139                             | 4.67                           |
| 2/22/03          | 7.69                             | 62                              | 2106                             | 1113                             | 145                             | 2717                             | 9.91                          | 409                              | 16                               | 136                             | 4.11                           |
| 3/23/03          | 7.50                             | 61                              | 1900                             | 1010                             | 143                             | 2718                             | 9.50                          | 355                              | 15                               | 84                              | 3.70                           |
| 4/19/03          | 7.10                             | 66                              | 1657                             | 963                              | 130                             | 2477                             | 8.67                          | 336                              | 13                               | 42                              | -                              |
| 5/20/03          | 7.16                             | 66                              | 1726                             | 944                              | 134                             | 2488                             | 8.72                          | 349                              | 13                               | 47                              | -                              |
| 6/21/03          | 7.23                             | 66                              | 1653                             | 924                              | 136                             | 2447                             | 8.53                          | 355                              | 13                               | 50                              | -                              |
| 7/23/03          | 6.57                             | 65                              | 1608                             | 938                              | 132                             | 2456                             | 8.53                          | 347                              | 13                               | 40                              | -                              |
| 8/21/03          | 6.90                             | 64                              | 1573                             | 942                              | 135                             | 2494                             | 8.58                          | 352                              | 13                               | 37                              | -                              |
| 9/23/03          | 6.82                             | 64                              | 1495                             | 911                              | 128                             | 2455                             | 8.35                          | 345                              | 13                               | 35                              | -                              |
| 11/22/03         | 6.52                             | 61                              | 1732                             | 987                              | 141                             | 2536                             | 8.92                          | 371                              | 15                               | 60                              | 3.60                           |
| 12/26/03         | 6.61                             | 58                              | 1951                             | 1049                             | 149                             | 2548                             | 9.29                          | 380                              | 16                               | 93                              | 3.58                           |
| 1/26/04          | 6.61                             | 57                              | 2123                             | 1078                             | 147                             | 2563                             | 9.55                          | 384                              | 16                               | 112                             | 3.38                           |
| 2/26/04          | 6.04                             | 66                              | 1487                             | 936                              | 132                             | 2535                             | 8.56                          | 335                              | 13                               | 18                              | 3.35                           |

Table-13. Time series data for As and other ions in shallow well at site B (depth - 19 m)

| Date of Sampling | As<br>( $\mu\text{moleL}^{-1}$ ) | P<br>( $\mu\text{moleL}^{-1}$ ) | Na<br>( $\mu\text{moleL}^{-1}$ ) | Mg<br>( $\mu\text{moleL}^{-1}$ ) | K<br>( $\mu\text{moleL}^{-1}$ ) | Ca<br>( $\mu\text{moleL}^{-1}$ ) | SMC<br>( $\text{meqL}^{-1}$ ) | Fe<br>( $\mu\text{moleL}^{-1}$ ) | Mn<br>( $\mu\text{moleL}^{-1}$ ) | S<br>( $\mu\text{moleL}^{-1}$ ) | Cl<br>( $\text{mmoleL}^{-1}$ ) |
|------------------|----------------------------------|---------------------------------|----------------------------------|----------------------------------|---------------------------------|----------------------------------|-------------------------------|----------------------------------|----------------------------------|---------------------------------|--------------------------------|
| 5/12/01          | 5.06                             | 47                              | 1904                             | 1170                             | 129                             | 2284                             | 8.94                          | 221                              | 26                               | 28                              | -                              |
| 5/26/01          | 4.71                             | 47                              | 1747                             | 1147                             | 112                             | 2334                             | 8.82                          | 222                              | 28                               | 7                               | -                              |
| 6/9/01           | 4.99                             | 52                              | 1574                             | 1152                             | 103                             | 2398                             | 8.78                          | 231                              | 31                               | 4                               | -                              |
| 6/20/01          | 5.15                             | 48                              | 1762                             | 1426                             | 121                             | 2546                             | 9.83                          | 210                              | 26                               | 3                               | 2.08                           |
| 7/14/01          | 5.44                             | 58                              | 1372                             | 1116                             | 95                              | 2382                             | 8.46                          | 337                              | 27                               | 2                               | 1.94                           |
| 7/28/01          | 5.57                             | 62                              | 1393                             | 1129                             | 93                              | 2404                             | 8.55                          | 312                              | 28                               | 3                               | 2.02                           |
| 8/11/01          | 5.68                             | 64                              | 1365                             | 1120                             | 92                              | 2429                             | 8.56                          | 303                              | 28                               | 3                               | 1.93                           |
| 8/25/01          | 5.89                             | 64                              | 1367                             | 1136                             | 95                              | 2418                             | 8.57                          | 315                              | 29                               | 3                               | 1.93                           |
| 9/8/01           | 5.92                             | 64                              | 1375                             | 1118                             | 91                              | 2395                             | 8.49                          | 337                              | 28                               | 2                               | 1.88                           |
| 9/28/01          | 6.03                             | 65                              | 1370                             | 1131                             | 91                              | 2412                             | 8.55                          | 349                              | 28                               | 2                               | 1.85                           |
| 10/27/01         | 5.98                             | 64                              | 1286                             | 1114                             | 90                              | 2334                             | 8.27                          | 351                              | 28                               | 2                               | 1.72                           |
| 11/24/01         | 6.38                             | 66                              | 1402                             | 1135                             | 93                              | 2422                             | 8.61                          | 377                              | 28                               | 2                               | 1.79                           |
| 1/5/02           | 6.16                             | 65                              | 1414                             | 1088                             | 89                              | 2352                             | 8.38                          | 381                              | 26                               | 2                               | 2.16                           |
| 6/30/02          | 5.43                             | 48                              | 1115                             | 1037                             | 92                              | 2259                             | 7.80                          | 477                              | 22                               | 20                              | 1.80                           |
| 7/27/02          | 6.02                             | 54                              | 1048                             | 994                              | 92                              | 2348                             | 7.82                          | 499                              | 22                               | 13                              | 1.74                           |
| 8/31/02          | 5.89                             | 56                              | 1081                             | 1027                             | 86                              | 2171                             | 7.56                          | 529                              | 22                               | 20                              | 1.81                           |
| 10/10/02         | 5.68                             | 60                              | 1053                             | 1009                             | 90                              | 2153                             | 7.47                          | 523                              | 22                               | 13                              | 1.71                           |
| 11/16/02         | 5.44                             | 55                              | 1053                             | 1000                             | 93                              | 2135                             | 7.42                          | 497                              | 21                               | 13                              | 1.72                           |
| 12/16/02         | 5.40                             | 54                              | 1093                             | 1003                             | 89                              | 2239                             | 7.66                          | 487                              | 20                               | 12                              | 1.73                           |
| 2/22/03          | 5.21                             | 58                              | 1085                             | 1098                             | 118                             | 2424                             | 8.25                          | 493                              | 21                               | 14                              | 2.14                           |
| 3/23/03          | 5.34                             | 53                              | 1033                             | 1069                             | 114                             | 2397                             | 8.08                          | 492                              | 22                               | 13                              | 2.00                           |
| 4/19/03          | 5.13                             | 56                              | 1065                             | 1069                             | 114                             | 2395                             | 8.11                          | 484                              | 22                               | 13                              | -                              |
| 5/20/03          | 5.00                             | 55                              | 925                              | 1049                             | 118                             | 2440                             | 8.02                          | 498                              | 22                               | 13                              | -                              |
| 6/21/03          | 4.89                             | 54                              | 962                              | 1068                             | 118                             | 2454                             | 8.12                          | 491                              | 22                               | 12                              | -                              |
| 7/23/03          | 4.74                             | 52                              | 936                              | 1030                             | 112                             | 2415                             | 7.94                          | 497                              | 22                               | 10                              | -                              |
| 8/21/03          | 4.98                             | 53                              | 963                              | 1075                             | 111                             | 2345                             | 7.91                          | 515                              | 21                               | 10                              | -                              |
| 9/23/03          | 5.11                             | 55                              | 947                              | 1029                             | 116                             | 2453                             | 8.03                          | 500                              | 22                               | 12                              | -                              |
| 11/22/03         | 4.42                             | 45                              | 992                              | 1038                             | 123                             | 2329                             | 7.85                          | 447                              | 21                               | 7                               | 1.77                           |
| 12/26/03         | 5.11                             | 55                              | 1041                             | 1049                             | 122                             | 2340                             | 7.94                          | 497                              | 21                               | 7                               | 1.74                           |
| 1/26/04          | 5.14                             | 55                              | 1041                             | 1059                             | 118                             | 2296                             | 7.87                          | 516                              | 22                               | 7                               | 1.74                           |
| 2/26/04          | 4.83                             | 51                              | 987                              | 1056                             | 123                             | 2388                             | 8.00                          | 489                              | 21                               | 6                               | 1.65                           |

Table-14. Time series data for As and other ions in shallow well at site B (depth - 29 m)

| Date of Sampling | As<br>( $\mu\text{moleL}^{-1}$ ) | P<br>( $\mu\text{moleL}^{-1}$ ) | Na<br>( $\mu\text{moleL}^{-1}$ ) | Mg<br>( $\mu\text{moleL}^{-1}$ ) | K<br>( $\mu\text{moleL}^{-1}$ ) | Ca<br>( $\mu\text{moleL}^{-1}$ ) | SMC<br>( $\text{meqL}^{-1}$ ) | Fe<br>( $\mu\text{moleL}^{-1}$ ) | Mn<br>( $\mu\text{moleL}^{-1}$ ) | S<br>( $\mu\text{moleL}^{-1}$ ) | Cl<br>( $\text{mmoleL}^{-1}$ ) |
|------------------|----------------------------------|---------------------------------|----------------------------------|----------------------------------|---------------------------------|----------------------------------|-------------------------------|----------------------------------|----------------------------------|---------------------------------|--------------------------------|
| 2/6/01           | 3.23                             | 54                              | 1064                             | 1084                             | 121                             | 2446                             | 8.25                          | 329                              | 8                                | 5                               | -                              |
| 2/19/01          | 3.26                             | 56                              | 1030                             | 1039                             | 122                             | 2419                             | 8.07                          | 348                              | 7                                | 4                               | -                              |
| 3/17/01          | 3.32                             | 62                              | 1094                             | 1024                             | 138                             | 2398                             | 8.08                          | 414                              | 7                                | 1.7                             | -                              |
| 3/31/01          | 3.45                             | 61                              | 1167                             | 1071                             | 143                             | 2513                             | 8.48                          | 403                              | 6                                | 1.6                             | -                              |
| 4/14/01          | 3.25                             | 58                              | 1144                             | 990                              | 136                             | 2383                             | 8.03                          | 368                              | 6                                | 2                               | -                              |
| 4/28/01          | 3.27                             | 58                              | 1165                             | 974                              | 134                             | 2347                             | 7.94                          | 366                              | 6                                | 1                               | -                              |
| 5/12/01          | 3.43                             | 62                              | 1192                             | 970                              | 131                             | 2356                             | 7.98                          | 399                              | 7                                | 0.9                             | -                              |
| 5/26/01          | 3.47                             | 53                              | 1149                             | 969                              | 129                             | 2389                             | 7.99                          | 368                              | 7                                | 0.2                             | -                              |
| 6/9/01           | 3.46                             | 52                              | 1084                             | 968                              | 125                             | 2387                             | 7.92                          | 354                              | 7                                | 2                               | -                              |
| 7/14/01          | 3.46                             | 50                              | 1092                             | 977                              | 131                             | 2418                             | 8.01                          | 347                              | 7                                | 2.5                             | 2.64                           |
| 7/28/01          | 3.38                             | 50                              | 1142                             | 1034                             | 131                             | 2382                             | 8.10                          | 345                              | 7                                | 3.5                             | 2.64                           |
| 8/11/01          | 3.46                             | 51                              | 1097                             | 979                              | 124                             | 2350                             | 7.88                          | 368                              | 7                                | 0                               | 2.64                           |
| 10/27/01         | 2.98                             | 38                              | 1136                             | 986                              | 127                             | 2350                             | 7.93                          | 300                              | 7                                | 0.9                             | 2.24                           |
| 2/22/03          | 2.91                             | 48                              | 1436                             | 1073                             | 167                             | 2299                             | 8.35                          | 333                              | 5                                | 6.7                             | -                              |
| 3/23/03          | 2.86                             | 56                              | 1455                             | 1088                             | 159                             | 2242                             | 8.27                          | 369                              | 5                                | 3                               | -                              |
| 4/19/03          | 2.69                             | 41                              | 1475                             | 1078                             | 157                             | 2212                             | 8.21                          | 304                              | 5                                | 5.2                             | -                              |
| 5/20/03          | 2.92                             | 56                              | 1431                             | 1117                             | 152                             | 2300                             | 8.42                          | 412                              | 5                                | 2.5                             | -                              |
| 6/21/03          | 3.08                             | 62                              | 1369                             | 1078                             | 158                             | 2372                             | 8.43                          | 417                              | 5                                | 1.3                             | -                              |
| 7/23/03          | 2.96                             | 60                              | 1379                             | 1137                             | 155                             | 2346                             | 8.50                          | 410                              | 5                                | 3                               | -                              |
| 8/21/03          | 2.75                             | 57                              | 1420                             | 1119                             | 157                             | 2340                             | 8.49                          | 397                              | 5                                | 3                               | -                              |
| 9/23/03          | 2.93                             | 58                              | 1367                             | 1101                             | 156                             | 2324                             | 8.37                          | 413                              | 6                                | 3                               | -                              |
| 11/22/03         | 2.95                             | 53                              | 1383                             | 1189                             | 159                             | 2112                             | 8.14                          | 387                              | 5                                | 10                              | -                              |
| 12/26/03         | 2.99                             | 35                              | 1408                             | 1092                             | 162                             | 2335                             | 8.42                          | 269                              | 5                                | 7                               | -                              |
| 1/26/04          | 3.14                             | 62                              | 1420                             | 1064                             | 165                             | 2255                             | 8.22                          | 444                              | 5                                | 5                               | -                              |
| 2/26/04          | 2.33                             | 29                              | 1410                             | 1072                             | 163                             | 2274                             | 8.26                          | 213                              | 6                                | 10                              | -                              |

Table-15. Time series data for As and other ions in deep well at site B (depth - 41 m)

| Date of Sampling | As<br>( $\mu\text{moleL}^{-1}$ ) | P<br>( $\mu\text{moleL}^{-1}$ ) | Na<br>( $\mu\text{moleL}^{-1}$ ) | Mg<br>( $\mu\text{moleL}^{-1}$ ) | K<br>( $\mu\text{moleL}^{-1}$ ) | Ca<br>( $\mu\text{moleL}^{-1}$ ) | SMC<br>( $\text{meqL}^{-1}$ ) | Fe<br>( $\mu\text{moleL}^{-1}$ ) | Mn<br>( $\mu\text{moleL}^{-1}$ ) | S<br>( $\mu\text{moleL}^{-1}$ ) | Cl<br>( $\text{mmoleL}^{-1}$ ) |
|------------------|----------------------------------|---------------------------------|----------------------------------|----------------------------------|---------------------------------|----------------------------------|-------------------------------|----------------------------------|----------------------------------|---------------------------------|--------------------------------|
| 2/6/01           | 0.24                             | 43                              | 785                              | 1490                             | 127                             | 946                              | 5.78                          | 135                              | 1.0                              | 4                               | -                              |
| 2/19/01          | 0.24                             | 37                              | 720                              | 1402                             | 113                             | 909                              | 5.45                          | 135                              | 1.2                              | 8                               | -                              |
| 3/17/01          | 0.27                             | 39                              | 709                              | 1320                             | 107                             | 890                              | 5.24                          | 156                              | 1.8                              | 8                               | -                              |
| 4/14/01          | 0.26                             | 40                              | 708                              | 1374                             | 115                             | 958                              | 5.49                          | 153                              | 1.8                              | 8                               | -                              |
| 4/28/01          | 0.25                             | 39                              | 682                              | 1344                             | 113                             | 933                              | 5.35                          | 149                              | 1.7                              | 8                               | -                              |
| 5/12/01          | 0.27                             | 43                              | 712                              | 1426                             | 108                             | 879                              | 5.43                          | 171                              | 1.7                              | 8                               | -                              |
| 5/26/01          | 0.26                             | 44                              | 711                              | 1393                             | 112                             | 933                              | 5.47                          | 173                              | 1.6                              | 8                               | -                              |
| 6/9/01           | 0.25                             | 44                              | 720                              | 1398                             | 114                             | 928                              | 5.49                          | 169                              | 1.6                              | 8                               | -                              |
| 6/20/01          | 0.30                             | 43                              | 1009                             | 1565                             | 146                             | 1035                             | 6.35                          | 111                              | 1.7                              | 2                               | 0.31                           |
| 7/14/01          | 0.24                             | 44                              | 697                              | 1443                             | 112                             | 938                              | 5.57                          | 155                              | 1.5                              | 8                               | 0.30                           |
| 7/28/01          | 0.24                             | 44                              | 706                              | 1418                             | 115                             | 952                              | 5.56                          | 158                              | 1.4                              | 8                               | 0.30                           |
| 8/11/01          | 0.25                             | 43                              | 712                              | 1407                             | 112                             | 947                              | 5.53                          | 158                              | 1.3                              | 8                               | 0.30                           |
| 8/25/01          | 0.25                             | 45                              | 691                              | 1413                             | 117                             | 963                              | 5.56                          | 160                              | 1.3                              | 8                               | 0.30                           |
| 9/8/01           | 0.24                             | 43                              | 712                              | 1451                             | 115                             | 943                              | 5.62                          | 155                              | 1.3                              | 8                               | 0.31                           |
| 9/28/01          | 0.26                             | 42                              | 681                              | 1424                             | 112                             | 961                              | 5.56                          | 158                              | 1.3                              | 8                               | 0.34                           |
| 10/27/01         | 0.25                             | 41                              | 723                              | 1498                             | 111                             | 963                              | 5.76                          | 168                              | 1.3                              | 8                               | 0.33                           |
| 11/24/01         | 0.27                             | 41                              | 725                              | 1475                             | 115                             | 983                              | 5.76                          | 162                              | 1.4                              | 9                               | 0.34                           |
| 1/5/02           | 0.29                             | 45                              | 754                              | 1521                             | 114                             | 1010                             | 5.93                          | 215                              | 1.5                              | 3                               | -                              |
| 3/30/02          | 0.26                             | 46                              | 766                              | 1547                             | 110                             | 970                              | 5.91                          | 204                              | 1.0                              | 3                               | -                              |
| 4/27/02          | 0.26                             | 42                              | 800                              | 1607                             | 120                             | 1021                             | 6.18                          | 191                              | 1.1                              | 3                               | -                              |
| 5/27/02          | 0.30                             | 56                              | 831                              | 1662                             | 119                             | 1069                             | 6.41                          | 244                              | 1.1                              | 3                               | -                              |
| 6/30/02          | 0.32                             | 54                              | 811                              | 1660                             | 120                             | 1064                             | 6.38                          | 239                              | 1.2                              | 3                               | -                              |
| 7/27/02          | 0.32                             | 53                              | 790                              | 1609                             | 115                             | 1038                             | 6.20                          | 253                              | 1.1                              | 2                               | -                              |
| 8/31/02          | 0.32                             | 52                              | 787                              | 1591                             | 116                             | 1022                             | 6.13                          | 247                              | 1.1                              | 3                               | -                              |
| 10/10/02         | 0.33                             | 51                              | 782                              | 1636                             | 114                             | 1011                             | 6.19                          | 244                              | 1.2                              | 3                               | -                              |
| 11/16/02         | 0.31                             | 48                              | 764                              | 1627                             | 116                             | 1002                             | 6.14                          | 240                              | 1.1                              | 3                               | -                              |
| 12/16/02         | 0.30                             | 43                              | 768                              | 1590                             | 111                             | 995                              | 6.05                          | 214                              | 1.4                              | 3                               | -                              |
| 2/22/03          | 0.27                             | 48                              | 729                              | 1679                             | 148                             | 1079                             | 6.39                          | 213                              | 1.0                              | 2                               | -                              |
| 3/23/03          | 0.30                             | 48                              | 723                              | 1690                             | 147                             | 1074                             | 6.40                          | 207                              | 1.0                              | 3                               | -                              |
| 4/19/03          | 0.28                             | 48                              | 729                              | 1675                             | 148                             | 1069                             | 6.36                          | 207                              | 0.9                              | 3                               | -                              |
| 5/20/03          | 0.31                             | 49                              | 729                              | 1803                             | 152                             | 1119                             | 6.72                          | 212                              | 1.0                              | 3                               | -                              |
| 6/21/03          | 0.26                             | 48                              | 738                              | 1763                             | 152                             | 1115                             | 6.64                          | 208                              | 0.9                              | 3                               | -                              |
| 7/23/03          | 0.29                             | 48                              | 735                              | 1820                             | 154                             | 1159                             | 6.85                          | 227                              | 0.8                              | 3                               | -                              |
| 8/21/03          | 0.26                             | 48                              | 722                              | 1823                             | 153                             | 1141                             | 6.80                          | 223                              | 0.8                              | 3                               | -                              |
| 9/23/03          | 0.26                             | 49                              | 719                              | 1831                             | 159                             | 1157                             | 6.86                          | 216                              | 0.9                              | 3                               | -                              |
| 11/22/03         | 0.28                             | 47                              | 727                              | 1749                             | 149                             | 1123                             | 6.62                          | 224                              | 0.9                              | 6                               | -                              |
| 12/26/03         | 0.28                             | 45                              | 694                              | 1734                             | 148                             | 1129                             | 6.57                          | 228                              | 0.9                              | 5                               | -                              |
| 1/26/04          | 0.28                             | 47                              | 721                              | 1744                             | 162                             | 1137                             | 6.64                          | 230                              | 0.9                              | 6                               | -                              |
| 2/26/04          | 0.28                             | 45                              | 716                              | 1768                             | 154                             | 1117                             | 6.64                          | 218                              | 0.9                              | 6                               | -                              |

Table-16. Time series data for As and other ions in deep well at site B (depth - 53 m)

| Date of Sampling | As<br>( $\mu\text{moleL}^{-1}$ ) | P<br>( $\mu\text{moleL}^{-1}$ ) | Na<br>( $\mu\text{moleL}^{-1}$ ) | Mg<br>( $\mu\text{moleL}^{-1}$ ) | K<br>( $\mu\text{moleL}^{-1}$ ) | Ca<br>( $\mu\text{moleL}^{-1}$ ) | SMC<br>( $\text{meqL}^{-1}$ ) | Fe<br>( $\mu\text{moleL}^{-1}$ ) | Mn<br>( $\mu\text{moleL}^{-1}$ ) | S<br>( $\mu\text{moleL}^{-1}$ ) | Cl<br>( $\text{mmoleL}^{-1}$ ) |
|------------------|----------------------------------|---------------------------------|----------------------------------|----------------------------------|---------------------------------|----------------------------------|-------------------------------|----------------------------------|----------------------------------|---------------------------------|--------------------------------|
| 2/6/01           | 0.24                             | 16                              | 1705                             | 501                              | 51                              | 764                              | 4.29                          | 100                              | 3                                | 10                              | -                              |
| 2/19/01          | 0.24                             | 16                              | 1714                             | 498                              | 52                              | 755                              | 4.27                          | 101                              | 3                                | 8                               | -                              |
| 3/17/01          | 0.25                             | 17                              | 1796                             | 509                              | 50                              | 759                              | 4.38                          | 109                              | 4                                | 8                               | -                              |
| 3/31/01          | 0.23                             | 17                              | 1741                             | 490                              | 51                              | 744                              | 4.26                          | 104                              | 4                                | 8                               | -                              |
| 4/14/01          | 0.23                             | 17                              | 1720                             | 475                              | 49                              | 773                              | 4.26                          | 105                              | 4                                | 8                               | -                              |
| 4/28/01          | 0.24                             | 18                              | 1803                             | 490                              | 48                              | 743                              | 4.32                          | 111                              | 4                                | 8                               | -                              |
| 5/12/01          | 0.25                             | 19                              | 1757                             | 480                              | 48                              | 745                              | 4.26                          | 122                              | 4                                | 9                               | -                              |
| 5/26/01          | 0.25                             | 18                              | 1819                             | 471                              | 48                              | 737                              | 4.28                          | 117                              | 4                                | 9                               | -                              |
| 6/9/01           | 0.24                             | 18                              | 1803                             | 479                              | 45                              | 731                              | 4.27                          | 119                              | 4                                | 8                               | -                              |
| 6/20/01          | 0.19                             | 16                              | 2038                             | 706                              | 57                              | 727                              | 5.26                          | 61                               | 3                                | <0.003                          | 0.33                           |
| 7/14/01          | 0.25                             | 18                              | 1730                             | 468                              | 43                              | 746                              | 4.20                          | 121                              | 3                                | 8                               | 0.31                           |
| 7/28/01          | 0.24                             | 18                              | 1757                             | 480                              | 44                              | 740                              | 4.24                          | 117                              | 3                                | 8                               | 0.30                           |
| 8/11/01          | 0.24                             | 18                              | 1780                             | 468                              | 43                              | 726                              | 4.21                          | 115                              | 4                                | 8                               | 0.32                           |
| 8/25/01          | 0.24                             | 18                              | 1783                             | 471                              | 45                              | 746                              | 4.26                          | 119                              | 3                                | 8                               | 0.30                           |
| 9/8/01           | 0.25                             | 18                              | 1747                             | 448                              | 45                              | 748                              | 4.18                          | 122                              | 4                                | 8                               | 0.32                           |
| 9/28/01          | 0.24                             | 18                              | 1772                             | 473                              | 44                              | 732                              | 4.23                          | 117                              | 3                                | 8                               | 0.32                           |
| 10/27/01         | 0.24                             | 18                              | 1791                             | 474                              | 44                              | 735                              | 4.25                          | 118                              | 3                                | 8                               | 0.34                           |
| 11/24/01         | 0.25                             | 18                              | 1793                             | 481                              | 45                              | 759                              | 4.32                          | 124                              | 4                                | 8                               | 0.33                           |
| 1/5/02           | 0.21                             | 18                              | 2003                             | 516                              | 49                              | 679                              | 4.44                          | 130                              | 3                                | <0.003                          | -                              |
| 3/30/02          | 0.21                             | 18                              | 1939                             | 537                              | 49                              | 696                              | 4.45                          | 123                              | 3                                | <0.003                          | -                              |
| 4/27/02          | 0.20                             | 16                              | 1946                             | 530                              | 50                              | 723                              | 4.50                          | 118                              | 3                                | <0.003                          | -                              |
| 5/27/02          | 0.23                             | 17                              | 2070                             | 538                              | 46                              | 673                              | 4.54                          | 127                              | 3                                | <0.003                          | -                              |
| 6/30/02          | 0.22                             | 17                              | 2075                             | 547                              | 44                              | 632                              | 4.48                          | 119                              | 3                                | <0.003                          | -                              |
| 7/27/02          | 0.22                             | 17                              | 1947                             | 511                              | 46                              | 679                              | 4.37                          | 128                              | 3                                | <0.003                          | -                              |
| 8/31/02          | 0.24                             | 18                              | 2067                             | 526                              | 47                              | 671                              | 4.51                          | 132                              | 3                                | <0.003                          | -                              |
| 10/10/02         | 0.22                             | 18                              | 1978                             | 515                              | 49                              | 697                              | 4.45                          | 132                              | 3                                | <0.003                          | -                              |
| 11/16/02         | 0.21                             | 17                              | 2028                             | 522                              | 49                              | 682                              | 4.49                          | 124                              | 3                                | <0.003                          | -                              |
| 12/16/02         | 0.24                             | 16                              | 1968                             | 505                              | 47                              | 662                              | 4.35                          | 130                              | 3                                | <0.003                          | -                              |
| 2/22/03          | 0.21                             | 17                              | 1802                             | 590                              | 61                              | 788                              | 4.62                          | 134                              | 3                                | <0.003                          | -                              |
| 3/23/03          | 0.24                             | 17                              | 1779                             | 589                              | 60                              | 778                              | 4.57                          | 128                              | 3                                | <0.003                          | -                              |
| 4/19/03          | 0.24                             | 17                              | 1721                             | 578                              | 59                              | 763                              | 4.46                          | 120                              | 3                                | <0.003                          | -                              |
| 5/20/03          | 0.25                             | 17                              | 1787                             | 586                              | 62                              | 780                              | 4.58                          | 126                              | 3                                | <0.003                          | -                              |
| 6/21/03          | 0.23                             | 18                              | 1738                             | 571                              | 59                              | 768                              | 4.48                          | 135                              | 3                                | <0.003                          | -                              |
| 7/23/03          | 0.23                             | 17                              | 1771                             | 566                              | 59                              | 770                              | 4.50                          | 130                              | 3                                | <0.003                          | -                              |
| 8/21/03          | 0.22                             | 17                              | 1759                             | 557                              | 58                              | 749                              | 4.43                          | 133                              | 3                                | <0.003                          | -                              |
| 9/23/03          | 0.22                             | 17                              | 1697                             | 560                              | 60                              | 775                              | 4.43                          | 132                              | 3                                | <0.003                          | -                              |
| 11/22/03         | 0.19                             | 18                              | 1778                             | 536                              | 77                              | 762                              | 4.45                          | 131                              | 3                                | 7                               | -                              |
| 12/26/03         | 0.22                             | 19                              | 1789                             | 552                              | 75                              | 749                              | 4.47                          | 125                              | 3                                | 7                               | -                              |
| 1/26/04          | 0.23                             | 16                              | 1795                             | 542                              | 66                              | 773                              | 4.49                          | 128                              | 3                                | 7                               | -                              |
| 2/26/04          | 0.20                             | 16                              | 1826                             | 521                              | 63                              | 740                              | 4.41                          | 125                              | 3                                | 7                               | -                              |

Table-17. Time series data for As and other ions in deep well at site B (depth - 91 m)

| Date of Sampling | As<br>( $\mu\text{moleL}^{-1}$ ) | P<br>( $\mu\text{moleL}^{-1}$ ) | Na<br>( $\mu\text{moleL}^{-1}$ ) | Mg<br>( $\mu\text{moleL}^{-1}$ ) | K<br>( $\mu\text{moleL}^{-1}$ ) | Ca<br>( $\mu\text{moleL}^{-1}$ ) | SMC<br>( $\text{meqL}^{-1}$ ) | Fe<br>( $\mu\text{moleL}^{-1}$ ) | Mn<br>( $\mu\text{moleL}^{-1}$ ) | S<br>( $\mu\text{moleL}^{-1}$ ) | Cl<br>( $\text{mmoleL}^{-1}$ ) |
|------------------|----------------------------------|---------------------------------|----------------------------------|----------------------------------|---------------------------------|----------------------------------|-------------------------------|----------------------------------|----------------------------------|---------------------------------|--------------------------------|
| 1/5/02           | 0.004                            | 4                               | 2079                             | 304                              | 40                              | 380                              | 3.49                          | 22                               | 1                                | <0.003                          | -                              |
| 3/30/02          | 0.004                            | 3                               | 1955                             | 344                              | 43                              | 406                              | 3.50                          | 23                               | 2                                | <0.003                          | 0.07                           |
| 4/27/02          | 0.004                            | 4                               | 1875                             | 378                              | 42                              | 415                              | 3.50                          | 25                               | 2                                | <0.003                          | 0.07                           |
| 5/27/02          | 0.004                            | 4                               | 1846                             | 369                              | 47                              | 478                              | 3.59                          | 23                               | 1                                | <0.003                          | 0.07                           |
| 6/30/02          | 0.004                            | 4                               | 1959                             | 372                              | 45                              | 364                              | 3.48                          | 23                               | 2                                | <0.003                          | 0.07                           |
| 7/27/02          | 0.004                            | 3                               | 1852                             | 350                              | 44                              | 532                              | 3.66                          | 29                               | 2                                | <0.003                          | 0.07                           |
| 8/31/02          | 0.004                            | 4                               | 1639                             | 459                              | 49                              | 502                              | 3.61                          | 22                               | 2                                | <0.003                          | 0.07                           |
| 10/10/02         | 0.004                            | 4                               | 1959                             | 361                              | 47                              | 397                              | 3.52                          | 24                               | 2                                | <0.003                          | -                              |
| 11/16/02         | 0.004                            | 4                               | 1931                             | 363                              | 40                              | 419                              | 3.54                          | 26                               | 2                                | <0.003                          | 0.08                           |
| 12/16/02         | 0.004                            | 4                               | 1777                             | 374                              | 46                              | 456                              | 3.48                          | 25                               | 2                                | <0.003                          | 0.08                           |
| 2/22/03          | 0.004                            | 4                               | 1845                             | 357                              | 44                              | 395                              | 3.39                          | 24                               | 2                                | <0.003                          | -                              |
| 3/23/03          | 0.004                            | 4                               | 1807                             | 341                              | 42                              | 425                              | 3.38                          | 21                               | 2                                | <0.003                          | -                              |
| 4/19/03          | 0.004                            | 4                               | 1815                             | 335                              | 44                              | 442                              | 3.41                          | 27                               | 2                                | <0.003                          | -                              |
| 5/20/03          | 0.004                            | 4                               | 1718                             | 371                              | 44                              | 458                              | 3.42                          | 26                               | 2                                | <0.003                          | -                              |
| 6/21/03          | 0.004                            | 4                               | 1741                             | 365                              | 44                              | 460                              | 3.44                          | 29                               | 2                                | <0.003                          | -                              |
| 7/23/03          | 0.004                            | 4                               | 1508                             | 427                              | 45                              | 557                              | 3.52                          | 27                               | 2                                | <0.003                          | -                              |
| 8/21/03          | 0.004                            | 4                               | 1852                             | 370                              | 44                              | 405                              | 3.45                          | 27                               | 2                                | <0.003                          | -                              |
| 9/23/03          | 0.004                            | 4                               | 1815                             | 352                              | 43                              | 442                              | 3.45                          | 25                               | 2                                | <0.003                          | -                              |
| 11/22/03         | 0.004                            | 4                               | 1751                             | 368                              | 43                              | 450                              | 3.43                          | 25                               | 2                                | <0.003                          | 0.08                           |
| 12/26/03         | 0.004                            | 4                               | 1877                             | 333                              | 48                              | 411                              | 3.41                          | 25                               | 2                                | <0.003                          | 0.08                           |
| 1/26/04          | 0.004                            | 4                               | 1860                             | 330                              | 48                              | 399                              | 3.37                          | 27                               | 2                                | <0.003                          | 0.08                           |
| 2/26/04          | 0.004                            | 4                               | 1714                             | 349                              | 47                              | 453                              | 3.37                          | 30                               | 2                                | <0.003                          | 0.08                           |

**Table-18a. Time series water level data (m) for shallow and deep wells at site B (5/2001-5/2002)**

| Date of<br>Measurement | Wells at different depths |      |      |      |     |      |      |      |
|------------------------|---------------------------|------|------|------|-----|------|------|------|
|                        | 7 m                       | 11 m | 14 m | 19 m | 29m | 41 m | 53 m | 91 m |
| 05/12/01               | 3.9                       | 3.7  | 3.7  | 3.7  | 3.7 | 3.7  | 3.0  | -    |
| 05/19/01               | 3.7                       | 3.7  | 3.7  | 3.7  | 3.7 | 3.7  | 3.2  | -    |
| 05/26/01               | 3.8                       | 3.8  | 3.8  | 3.8  | 3.8 | 3.8  | 3.3  | -    |
| 06/02/01               | 4.3                       | 4.3  | 4.3  | 4.3  | 4.3 | 4.3  | 3.6  | -    |
| 06/09/01               | 5.0                       | 5.0  | 5.0  | 5.0  | 5.0 | 5.0  | 4.0  | -    |
| 06/30/01               | 5.2                       | 5.2  | 5.2  | 5.2  | 5.2 | 5.2  | 4.8  | -    |
| 07/07/01               | 5.1                       | 5.2  | 5.2  | 5.2  | 5.2 | 5.3  | 4.8  | -    |
| 07/14/01               | 5.3                       | 5.3  | 5.3  | 5.3  | 5.3 | 5.3  | 4.9  | -    |
| 07/21/01               | 5.3                       | 5.3  | 5.2  | 5.0  | 5.3 | 5.5  | 5.4  | -    |
| 07/28/01               | 5.7                       | 5.6  | 5.6  | 5.2  | 5.6 | 5.7  | 5.8  | -    |
| 08/04/01               | 5.8                       | 5.8  | 5.8  | 5.8  | 5.8 | 5.8  | 5.5  | -    |
| 08/11/01               | 6.2                       | 6.2  | 6.2  | 6.2  | 6.2 | 6.2  | 5.9  | -    |
| 08/18/01               | 6.0                       | 6.0  | 6.1  | 6.0  | 6.1 | 6.1  | 5.8  | -    |
| 08/25/01               | 5.9                       | 5.9  | 5.9  | 5.9  | 5.9 | 5.9  | 5.6  | -    |
| 09/01/01               | 6.0                       | 6.0  | 6.0  | 6.0  | 6.0 | 6.0  | 5.7  | -    |
| 09/08/01               | 6.1                       | 6.1  | 6.1  | 6.1  | 6.1 | 6.1  | 5.9  | -    |
| 09/15/01               | 6.0                       | 6.0  | 6.0  | 6.0  | 6.0 | 6.0  | 5.8  | -    |
| 9/22/2001              | 6.0                       | 6.1  | 6.1  | 6.1  | 6.1 | 6.1  | 5.9  | -    |
| 09/28/01               | 5.8                       | 5.8  | 5.8  | 5.8  | 5.8 | 5.8  | 5.6  | -    |
| 10/06/01               | 5.7                       | 5.7  | 5.7  | 5.7  | 5.7 | 5.7  | 5.5  | -    |
| 10/13/01               | 5.6                       | 5.6  | 5.6  | 5.6  | 5.6 | 5.6  | 5.4  | -    |
| 10/20/01               | 5.8                       | 5.8  | 5.8  | 5.8  | 5.8 | 5.7  | 5.5  | -    |
| 10/27/01               | 5.4                       | 5.4  | 5.4  | 5.4  | 5.4 | 5.4  | 5.3  | -    |
| 11/03/01               | 5.4                       | 5.4  | 5.4  | 5.4  | 5.4 | 5.5  | 5.2  | -    |
| 11/10/01               | 5.3                       | 5.3  | 5.3  | 5.3  | 5.3 | 5.3  | 5.1  | -    |
| 11/17/01               | 5.2                       | 5.2  | 5.2  | 5.2  | 5.2 | 5.2  | 4.9  | -    |
| 11/24/01               | 5.0                       | 5.1  | 5.1  | 5.1  | 5.1 | 5.0  | 4.8  | -    |
| 12/01/01               | 4.9                       | 4.9  | 4.9  | 4.9  | 4.9 | 4.9  | 4.6  | -    |
| 12/08/01               | 4.8                       | 4.8  | 4.8  | 4.8  | 4.8 | 4.8  | 4.5  | -    |
| 12/29/01               | 4.5                       | 4.6  | 4.5  | 4.5  | 4.5 | 4.5  | 4.2  | -    |
| 01/05/02               | 4.4                       | 4.4  | 4.4  | 4.4  | 4.4 | 4.4  | 4.1  | -    |
| 01/12/02               | 4.1                       | 4.0  | 4.0  | 3.9  | 4.0 | 4.2  | 4.2  | -    |
| 02/18/02               | 2.8                       | 2.8  | 2.8  | 2.8  | 2.8 | 2.9  | 2.8  | -    |
| 03/16/02               | 2.4                       | 2.5  | 2.5  | 2.5  | 2.5 | 2.5  | 2.4  | -    |
| 03/23/02               | 2.3                       | 2.3  | 2.3  | 2.3  | 2.3 | 2.4  | 2.3  | -    |
| 03/30/02               | 3.3                       | 3.3  | 3.3  | 3.3  | 3.3 | 3.3  | 2.9  | -    |
| 04/13/02               | 3.0                       | 3.0  | 3.0  | 3.0  | 3.0 | 3.0  | 2.9  | -    |
| 04/20/02               | 2.7                       | 2.7  | 2.7  | 2.7  | 2.7 | 2.7  | 2.6  | -    |
| 04/27/02               | 3.1                       | 3.1  | 3.1  | 3.1  | 3.1 | 3.1  | 2.7  | -    |
| 05/12/02               | 4.6                       | 4.6  | 4.6  | 4.6  | 4.6 | 4.5  | 3.8  | -    |

- Well was not installed

**Table-18b. Time series water level data (m) for shallow and deep wells at site B (5/2002-2/2004)**

| Date of<br>Measurement | Wells at different depths |      |      |      |     |      |      |      |
|------------------------|---------------------------|------|------|------|-----|------|------|------|
|                        | 7 m                       | 11 m | 14 m | 19 m | 29m | 41 m | 53 m | 91 m |
| 05/27/02               | 4.9                       | 4.9  | 4.8  | 4.9  | 4.9 | 4.9  | 4.1  | -    |
| 06/08/02               | 5.4                       | 5.4  | 5.4  | 5.4  | 5.2 | 5.4  | 4.6  | -    |
| 06/15/02               | 5.4                       | 5.4  | 5.4  | 5.4  | 5.4 | 5.3  | 5.4  | 4.2  |
| 06/30/02               | 5.7                       | 5.6  | 5.7  | 5.7  | 5.7 | 5.8  | 5.7  | x    |
| 07/14/02               | 6.1                       | 6.1  | 6.2  | 6.2  | 6.1 | 6.1  | 5.8  | x    |
| 07/27/02               | 6.3                       | 6.3  | 6.3  | 6.3  | 6.3 | 6.3  | 6.0  | 5.5  |
| 08/07/02               | 6.7                       | 6.7  | 6.7  | 6.7  | 6.7 | 6.7  | 6.4  | x    |
| 08/31/02               | 6.3                       | 6.3  | 6.3  | 6.3  | 6.3 | 6.3  | 6.1  | x    |
| 09/15/02               | 5.5                       | 5.5  | 5.5  | 5.5  | 5.5 | 5.5  | 5.4  | 4.8  |
| 10/11/02               | 5.4                       | 5.4  | 5.4  | 5.4  | 5.4 | 5.4  | 5.2  | x    |
| 11/16/02               | 5.3                       | 5.3  | 5.3  | 5.3  | 5.3 | 5.3  | 4.8  | 4.5  |
| 12/03/02               | 4.7                       | 4.8  | 4.7  | 4.7  | 4.7 | 4.7  | 4.4  | x    |
| 12/16/02               | 4.6                       | 4.6  | 4.6  | 4.6  | 4.6 | 4.6  | 4.3  | x    |
| 01/14/03               | 3.8                       | 3.8  | 3.8  | 3.8  | 3.8 | 3.9  | 3.7  | 3.4  |
| 02/01/03               | 3.0                       | 3.0  | 3.0  | 3.0  | 3.0 | 3.1  | 3.0  | 2.8  |
| 02/15/03               | 3.1                       | 3.1  | 3.1  | 3.1  | 3.1 | 3.2  | 2.9  | 2.5  |
| 03/02/03               | 2.6                       | 2.6  | 2.6  | 2.6  | 2.6 | 2.6  | 2.5  | 2.2  |
| 03/15/03               | 3.2                       | 3.2  | 3.2  | 3.2  | 3.2 | 3.3  | 2.6  | 2.2  |
| 03/31/03               | 3.6                       | 3.6  | 3.6  | 3.6  | 3.6 | 3.6  | 2.8  | 2.4  |
| 04/12/03               | 2.8                       | 2.8  | 2.8  | 2.8  | 2.8 | 2.9  | 2.6  | 2.4  |
| 04/26/03               | 3.3                       | 3.3  | 3.3  | 3.3  | 3.3 | 3.4  | 2.9  | 2.5  |
| 05/11/03               | 4.3                       | 4.3  | 4.3  | 4.3  | 4.3 | 4.3  | 3.6  | x    |
| 05/24/03               | 4.2                       | 4.2  | 4.2  | 4.2  | 4.2 | 3.1  | 4.2  | 3.2  |
| 06/07/03               | 4.7                       | 4.7  | 4.7  | 4.7  | 4.7 | 3.3  | 4.6  | 3.4  |
| 06/24/03               | 5.5                       | 5.5  | 5.5  | 5.5  | 5.5 | 4.2  | 5.4  | 4.3  |
| 07/08/03               | 6.1                       | 6.1  | 6.1  | 6.1  | 6.1 | 5.1  | 6.0  | 5.2  |
| 07/22/03               | 6.8                       | 6.8  | 6.8  | 6.8  | 6.8 | 6.7  | 6.3  | 5.9  |
| 08/05/03               | 6.0                       | 6.3  | 6.4  | 6.4  | 6.4 | 5.7  | 6.3  | 6.5  |
| 08/21/03               | 6.0                       | 6.0  | 6.0  | 6.0  | 6.0 | 6.0  | 5.7  | 5.5  |
| 09/03/03               | 6.2                       | 6.2  | 6.2  | 6.2  | 5.6 | 6.0  | 5.9  | 5.7  |
| 09/18/03               | 6.1                       | 6.1  | 6.1  | 6.1  | 6.1 | 6.1  | 5.8  | 5.6  |
| 10/01/03               | 6.2                       | 6.2  | 6.2  | 6.2  | 6.2 | 6.2  | 5.9  | x    |
| 11/09/03               | 4.8                       | 5.3  | 5.3  | 5.3  | 5.3 | 5.3  | 5.0  | 5.4  |
| 11/23/03               | 5.0                       | 5.0  | 5.0  | 5.0  | 5.0 | 5.0  | 4.7  | x    |
| 12/10/03               | 4.7                       | 4.7  | 4.7  | 4.7  | 4.7 | 4.7  | 4.4  | 4.2  |
| 12/25/03               | 4.6                       | 4.7  | 4.7  | 4.7  | 4.7 | 4.6  | 4.2  | x    |
| 01/11/04               | 4.4                       | 4.4  | 4.4  | 4.4  | 4.4 | 4.4  | 4.0  | 3.7  |
| 01/25/04               | 3.7                       | 3.7  | 3.7  | 3.7  | 3.7 | 3.7  | 3.5  | x    |
| 02/16/04               | 3.2                       | 3.2  | 3.2  | 3.2  | 3.2 | 3.2  | 2.7  | x    |
| 02/27/04               | 2.9                       | 2.9  | 2.9  | 2.9  | 2.9 | 2.9  | 2.6  | x    |

x Well was not accessible due to public use

Table-19. Time series data for As and other ions in shallow well at site C (depth - 5 m)

| Date of Sampling | As<br>( $\mu\text{moleL}^{-1}$ ) | P<br>( $\mu\text{moleL}^{-1}$ ) | Na<br>( $\mu\text{moleL}^{-1}$ ) | Mg<br>( $\mu\text{moleL}^{-1}$ ) | K<br>( $\mu\text{moleL}^{-1}$ ) | Ca<br>( $\mu\text{moleL}^{-1}$ ) | SMC<br>( $\text{meqL}^{-1}$ ) | Fe<br>( $\mu\text{moleL}^{-1}$ ) | Mn<br>( $\mu\text{moleL}^{-1}$ ) | S<br>( $\mu\text{moleL}^{-1}$ ) | Cl<br>( $\text{mmoleL}^{-1}$ ) |
|------------------|----------------------------------|---------------------------------|----------------------------------|----------------------------------|---------------------------------|----------------------------------|-------------------------------|----------------------------------|----------------------------------|---------------------------------|--------------------------------|
| 3/16/02          | 0.17                             | 32                              | 226                              | 188                              | 60                              | 293                              | 1.25                          | 466                              | 22                               | 5                               | 0.11                           |
| 4/13/02          | 0.19                             | 33                              | 234                              | 190                              | 59                              | 308                              | 1.29                          | 487                              | 22                               | 4                               | 0.11                           |
| 5/12/02          | 0.17                             | 34                              | 237                              | 156                              | 50                              | 276                              | 1.15                          | 598                              | 24                               | 8                               | 0.11                           |
| 6/15/02          | 0.18                             | 31                              | 396                              | 190                              | 57                              | 350                              | 1.54                          | 796                              | 28                               | 33                              | 0.16                           |
| 7/13/02          | 0.16                             | 32                              | 434                              | 217                              | 61                              | 374                              | 1.68                          | 795                              | 28                               | 45                              | 0.17                           |
| 9/15/02          | 0.19                             | 31                              | 347                              | 194                              | 50                              | 341                              | 1.47                          | 676                              | 23                               | 23                              | 0.14                           |
| 11/26/02         | 0.16                             | 32                              | 278                              | 182                              | 64                              | 270                              | 1.25                          | 614                              | 19                               | 16                              | 0.10                           |
| 1/12/03          | 0.15                             | 31                              | 276                              | 206                              | 74                              | 330                              | 1.42                          | 688                              | 22                               | 21                              | 0.28                           |
| 2/8/03           | 0.16                             | 31                              | 346                              | 202                              | 55                              | 348                              | 1.50                          | 795                              | 26                               | 24                              | -                              |
| 3/8/03           | 0.17                             | 27                              | 327                              | 209                              | 69                              | 382                              | 1.58                          | 883                              | 30                               | 75                              | -                              |
| 4/5/03           | 0.16                             | 35                              | 325                              | 197                              | 74                              | 319                              | 1.43                          | 804                              | 25                               | 31                              | -                              |
| 5/2/03           | 0.17                             | 29                              | 357                              | 211                              | 80                              | 395                              | 1.65                          | 913                              | 32                               | 26                              | -                              |
| 6/2/03           | 0.18                             | 29                              | 658                              | 329                              | 85                              | 573                              | 2.55                          | 1378                             | 44                               | 45                              | -                              |
| 7/6/03           | 0.15                             | 33                              | 645                              | 228                              | 61                              | 382                              | 1.93                          | 929                              | 26                               | 29                              | -                              |
| 11/3/03          | 0.12                             | 45                              | 5479                             | 235                              | 120                             | 341                              | 6.75                          | 898                              | 19                               | 23                              | 1.78                           |
| 12/9/03          | 0.14                             | 42                              | 5738                             | 369                              | 121                             | 511                              | 7.62                          | 1578                             | 27                               | 30                              | 1.62                           |
| 1/7/04           | 0.12                             | 44                              | 5584                             | 207                              | 93                              | 255                              | 6.60                          | 819                              | 13                               | 16                              | 1.50                           |
| 2/10/04          | 0.16                             | 51                              | 5646                             | 159                              | 84                              | 223                              | 6.49                          | 600                              | 12                               | 3                               | 1.60                           |

Table-20. Time series data for As and other ions in shallow well at site C (depth - 8 m)

| Date of Sampling | As<br>( $\mu\text{moleL}^{-1}$ ) | P<br>( $\mu\text{moleL}^{-1}$ ) | Na<br>( $\mu\text{moleL}^{-1}$ ) | Mg<br>( $\mu\text{moleL}^{-1}$ ) | K<br>( $\mu\text{moleL}^{-1}$ ) | Ca<br>( $\mu\text{moleL}^{-1}$ ) | SMC<br>( $\text{meqL}^{-1}$ ) | Fe<br>( $\mu\text{moleL}^{-1}$ ) | Mn<br>( $\mu\text{moleL}^{-1}$ ) | S<br>( $\mu\text{moleL}^{-1}$ ) | Cl<br>( $\text{mmoleL}^{-1}$ ) |
|------------------|----------------------------------|---------------------------------|----------------------------------|----------------------------------|---------------------------------|----------------------------------|-------------------------------|----------------------------------|----------------------------------|---------------------------------|--------------------------------|
| 3/16/02          | 0.46                             | 24                              | 436                              | 135                              | 146                             | 251                              | 1.25                          | 1316                             | 44                               | 27                              | 0.21                           |
| 4/13/02          | 0.52                             | 19                              | 353                              | 157                              | 144                             | 284                              | 1.38                          | 1300                             | 47                               | 21                              | 0.18                           |
| 5/12/02          | 0.48                             | 23                              | 433                              | 121                              | 128                             | 235                              | 1.17                          | 1250                             | 43                               | 27                              | 0.20                           |
| 6/15/02          | 0.49                             | 20                              | 514                              | 143                              | 145                             | 264                              | 1.47                          | 1267                             | 47                               | 39                              | 0.25                           |
| 7/13/02          | 0.51                             | 24                              | 515                              | 146                              | 140                             | 280                              | 1.51                          | 1367                             | 48                               | 39                              | 0.25                           |
| 9/15/02          | 0.48                             | 21                              | 456                              | 136                              | 100                             | 264                              | 1.36                          | 1099                             | 50                               | 21                              | 0.19                           |
| 11/26/02         | 0.50                             | 24                              | 491                              | 125                              | 105                             | 246                              | 1.24                          | 1113                             | 48                               | 7                               | 0.18                           |
| 1/12/03          | 0.45                             | 24                              | 543                              | 113                              | 129                             | 228                              | 1.12                          | 1159                             | 43                               | 17                              | 0.16                           |
| 3/8/03           | 0.52                             | 23                              | 526                              | 139                              | 153                             | 268                              | 1.29                          | 1391                             | 44                               | 22                              | -                              |
| 4/5/03           | 0.51                             | 23                              | 362                              | 154                              | 167                             | 282                              | 1.40                          | 1377                             | 44                               | 25                              | -                              |
| 5/2/03           | 0.51                             | 21                              | 382                              | 149                              | 168                             | 295                              | 1.44                          | 1310                             | 44                               | 29                              | -                              |
| 6/2/03           | 0.55                             | 20                              | 831                              | 326                              | 266                             | 711                              | 3.17                          | 2823                             | 103                              | 24                              | -                              |
| 7/6/03           | 0.51                             | 20                              | 600                              | 250                              | 171                             | 529                              | 2.33                          | 1851                             | 75                               | 72                              | -                              |
| 11/3/03          | 0.52                             | 24                              | 452                              | 333                              | 168                             | 599                              | 2.48                          | 2681                             | 114                              | 41                              | 1.29                           |
| 12/9/03          | 0.57                             | 31                              | 4510                             | 397                              | 191                             | 749                              | 6.99                          | 3352                             | 132                              | 16                              | 2.10                           |
| 1/7/04           | 0.54                             | 33                              | 7399                             | 229                              | 155                             | 403                              | 8.82                          | 1557                             | 67                               | 21                              | 1.88                           |
| 2/10/04          | 0.54                             | 30                              | 4504                             | 289                              | 175                             | 509                              | 6.27                          | 2580                             | 84                               | 4                               | 1.61                           |

Table-21. Time series data for As and other ions in shallow well at site C (depth - 11 m)

| Date of Sampling | As<br>( $\mu\text{moleL}^{-1}$ ) | P<br>( $\mu\text{moleL}^{-1}$ ) | Na<br>( $\mu\text{moleL}^{-1}$ ) | Mg<br>( $\mu\text{moleL}^{-1}$ ) | K<br>( $\mu\text{moleL}^{-1}$ ) | Ca<br>( $\mu\text{moleL}^{-1}$ ) | SMC<br>( $\text{meqL}^{-1}$ ) | Fe<br>( $\mu\text{moleL}^{-1}$ ) | Mn<br>( $\mu\text{moleL}^{-1}$ ) | S<br>( $\mu\text{moleL}^{-1}$ ) | Cl<br>( $\text{mmoleL}^{-1}$ ) |
|------------------|----------------------------------|---------------------------------|----------------------------------|----------------------------------|---------------------------------|----------------------------------|-------------------------------|----------------------------------|----------------------------------|---------------------------------|--------------------------------|
| 3/16/02          | 0.54                             | 21                              | 416                              | 180                              | 158                             | 308                              | 1.55                          | 684                              | 28                               | 17                              | 0.35                           |
| 4/13/02          | 0.54                             | 22                              | 463                              | 163                              | 150                             | 288                              | 1.52                          | 783                              | 28                               | 17                              | 0.36                           |
| 5/12/02          | 0.58                             | 22                              | 469                              | 140                              | 145                             | 258                              | 1.41                          | 1069                             | 32                               | 16                              | 0.35                           |
| 6/15/02          | 0.59                             | 23                              | 450                              | 153                              | 149                             | 266                              | 1.44                          | 798                              | 31                               | 16                              | 0.38                           |
| 7/13/02          | 0.58                             | 23                              | 485                              | 160                              | 147                             | 269                              | 1.49                          | 838                              | 30                               | 16                              | 0.38                           |
| 9/15/02          | 0.56                             | 19                              | 469                              | 150                              | 143                             | 269                              | 1.45                          | 987                              | 30                               | 16                              | 0.38                           |
| 11/26/02         | 0.50                             | 21                              | 345                              | 123                              | 123                             | 213                              | 1.14                          | 1196                             | 26                               | 2                               | 0.40                           |
| 1/12/03          | 0.47                             | 25                              | 287                              | 116                              | 133                             | 213                              | 1.08                          | 988                              | 25                               | 2                               | 0.39                           |
| 2/8/03           | 0.56                             | 22                              | 320                              | 133                              | 132                             | 223                              | 1.17                          | 969                              | 24                               | 16                              | -                              |
| 3/8/03           | 0.56                             | 22                              | 340                              | 143                              | 138                             | 239                              | 1.24                          | 893                              | 25                               | 16                              | -                              |
| 4/5/03           | 0.59                             | 23                              | 344                              | 148                              | 137                             | 251                              | 1.28                          | 1044                             | 28                               | 16                              | -                              |
| 5/2/03           | 0.58                             | 21                              | 352                              | 156                              | 139                             | 264                              | 1.33                          | 1179                             | 31                               | 16                              | -                              |
| 6/2/03           | 0.58                             | 20                              | 372                              | 151                              | 136                             | 276                              | 1.36                          | 1358                             | 33                               | 15                              | -                              |
| 11/3/03          | 0.57                             | 24                              | 406                              | 312                              | 197                             | 554                              | 2.94                          | 1543                             | 34                               | 2                               | 0.39                           |
| 12/9/03          | 0.59                             | 24                              | 620                              | 170                              | 162                             | 278                              | 1.47                          | 2284                             | 46                               | 2                               | 0.77                           |
| 1/7/04           | 0.62                             | 23                              | 1263                             | 238                              | 177                             | 387                              | 2.05                          | 3227                             | 80                               | 2                               | 2.13                           |
| 2/10/04          | 0.58                             | 25                              | 2335                             | 389                              | 234                             | 699                              | 3.67                          | 2446                             | 50                               | 2                               | 1.39                           |

Table-22. Time series data for As and other ions in shallow well at site C (depth - 14 m)

| Date of Sampling | As<br>( $\mu\text{moleL}^{-1}$ ) | P<br>( $\mu\text{moleL}^{-1}$ ) | Na<br>( $\mu\text{moleL}^{-1}$ ) | Mg<br>( $\mu\text{moleL}^{-1}$ ) | K<br>( $\mu\text{moleL}^{-1}$ ) | Ca<br>( $\mu\text{moleL}^{-1}$ ) | SMC<br>( $\text{meqL}^{-1}$ ) | Fe<br>( $\mu\text{moleL}^{-1}$ ) | Mn<br>( $\mu\text{moleL}^{-1}$ ) | S<br>( $\mu\text{moleL}^{-1}$ ) | Cl<br>( $\text{mmoleL}^{-1}$ ) |
|------------------|----------------------------------|---------------------------------|----------------------------------|----------------------------------|---------------------------------|----------------------------------|-------------------------------|----------------------------------|----------------------------------|---------------------------------|--------------------------------|
| 3/16/02          | 0.96                             | 34                              | 361                              | 504                              | 105                             | 671                              | 2.82                          | 828                              | 36                               | 36                              | 0.32                           |
| 4/13/02          | 0.86                             | 28                              | 375                              | 501                              | 100                             | 699                              | 2.88                          | 741                              | 35                               | 40                              | 0.34                           |
| 5/12/02          | 0.94                             | 34                              | 360                              | 500                              | 99                              | 683                              | 2.82                          | 827                              | 35                               | 36                              | 0.35                           |
| 6/15/02          | 1.04                             | 36                              | 349                              | 485                              | 93                              | 677                              | 2.77                          | 820                              | 35                               | 34                              | 0.33                           |
| 7/13/02          | 0.80                             | 24                              | 538                              | 532                              | 96                              | 774                              | 3.25                          | 705                              | 32                               | 3                               | 0.35                           |
| 9/15/02          | 0.52                             | 19                              | 518                              | 509                              | 100                             | 875                              | 3.39                          | 637                              | 31                               | 3                               | 0.36                           |
| 11/26/02         | 0.82                             | 31                              | 357                              | 413                              | 115                             | 594                              | 2.49                          | 790                              | 31                               | 41                              | 0.32                           |
| 1/12/03          | 0.97                             | 33                              | 313                              | 372                              | 115                             | 605                              | 2.38                          | 622                              | 27                               | 38                              | 0.25                           |
| 2/8/03           | 0.97                             | 34                              | 393                              | 407                              | 115                             | 591                              | 2.50                          | 756                              | 30                               | 39                              | -                              |
| 3/8/03           | 1.00                             | 34                              | 386                              | 430                              | 99                              | 623                              | 2.59                          | 676                              | 29                               | 41                              | -                              |
| 4/5/03           | 0.98                             | 33                              | 359                              | 464                              | 106                             | 666                              | 2.73                          | 773                              | 33                               | 28                              | -                              |
| 5/2/03           | 0.98                             | 32                              | 361                              | 507                              | 107                             | 709                              | 2.90                          | 877                              | 36                               | 25                              | -                              |
| 6/2/03           | 1.02                             | 32                              | 361                              | 521                              | 98                              | 740                              | 2.98                          | 770                              | 35                               | 22                              | -                              |
| 7/6/03           | 0.99                             | 35                              | 335                              | 495                              | 96                              | 670                              | 2.76                          | 852                              | 33                               | 21                              | -                              |
| 11/3/03          | 0.97                             | 31                              | 323                              | 421                              | 127                             | 683                              | 2.66                          | 787                              | 33                               | 3                               | 0.34                           |
| 12/9/03          | 0.99                             | 33                              | 334                              | 418                              | 129                             | 639                              | 2.58                          | 820                              | 32                               | 3                               | 0.31                           |
| 1/7/04           | 1.00                             | 30                              | 363                              | 459                              | 131                             | 708                              | 2.83                          | 887                              | 36                               | 3                               | 0.40                           |
| 2/10/04          | 0.98                             | 31                              | 341                              | 391                              | 124                             | 588                              | 2.42                          | 747                              | 30                               | 3                               | 0.28                           |

Table-23. Time series data for As and other ions in deep well at site C (depth - 53 m)

| Date of Sampling | As<br>( $\mu\text{moleL}^{-1}$ ) | P<br>( $\mu\text{moleL}^{-1}$ ) | Na<br>( $\mu\text{moleL}^{-1}$ ) | Mg<br>( $\mu\text{moleL}^{-1}$ ) | K<br>( $\mu\text{moleL}^{-1}$ ) | Ca<br>( $\mu\text{moleL}^{-1}$ ) | SMC<br>( $\text{meqL}^{-1}$ ) | Fe<br>( $\mu\text{moleL}^{-1}$ ) | Mn<br>( $\mu\text{moleL}^{-1}$ ) | S<br>( $\mu\text{moleL}^{-1}$ ) | Cl<br>( $\text{mmoleL}^{-1}$ ) |
|------------------|----------------------------------|---------------------------------|----------------------------------|----------------------------------|---------------------------------|----------------------------------|-------------------------------|----------------------------------|----------------------------------|---------------------------------|--------------------------------|
| 3/16/02          | 0.015                            | 4                               | 1254                             | 352                              | 31                              | 560                              | 3.11                          | 47                               | 12                               | 3                               | 0.59                           |
| 4/13/02          | 0.012                            | 2                               | 1325                             | 372                              | 23                              | 542                              | 3.18                          | 27                               | 6                                | 3                               | 0.61                           |
| 5/12/02          | 0.015                            | 3                               | 1266                             | 351                              | 30                              | 515                              | 3.03                          | 53                               | 14                               | 5                               | 0.62                           |
| 6/15/02          | 0.014                            | 2                               | 1267                             | 342                              | 28                              | 507                              | 2.99                          | 37                               | 15                               | 8                               | 0.63                           |
| 7/13/02          | 0.038                            | 4                               | 1310                             | 348                              | 25                              | 476                              | 2.98                          | 67                               | 16                               | 18                              | 0.64                           |
| 9/15/02          | 0.026                            | 5                               | 1328                             | 418                              | 39                              | 455                              | 3.11                          | 195                              | 16                               | 22                              | 0.65                           |
| 11/26/02         | 0.030                            | 3                               | 1206                             | 334                              | 40                              | 439                              | 2.79                          | 72                               | 15                               | 11                              | 0.64                           |
| 1/12/03          | 0.012                            | 4                               | 1024                             | 320                              | 46                              | 422                              | 2.55                          | 158                              | 14                               | 17                              | 0.53                           |
| 2/8/03           | 0.012                            | 4                               | 1246                             | 375                              | 29                              | 442                              | 2.91                          | 196                              | 14                               | 15                              | -                              |
| 3/8/03           | 0.015                            | 5                               | 1293                             | 390                              | 32                              | 451                              | 3.01                          | 240                              | 14                               | 17                              | -                              |
| 4/5/03           | 0.013                            | 5                               | 1283                             | 391                              | 33                              | 440                              | 2.98                          | 274                              | 14                               | 18                              | -                              |
| 5/2/03           | 0.017                            | 5                               | 1285                             | 400                              | 36                              | 456                              | 3.03                          | 288                              | 14                               | 17                              | -                              |
| 6/2/03           | 0.013                            | 4                               | 1258                             | 381                              | 32                              | 435                              | 2.92                          | 203                              | 13                               | 15                              | -                              |
| 7/6/03           | 0.044                            | 4                               | 1338                             | 366                              | 27                              | 475                              | 3.05                          | 60                               | 14                               | 8                               | -                              |
| 11/3/03          | 0.012                            | 3                               | 1110                             | 340                              | 34                              | 391                              | 2.61                          | 28                               | 12                               | 0                               | 0.54                           |
| 12/9/03          | 0.014                            | 3                               | 1082                             | 340                              | 35                              | 413                              | 2.62                          | 32                               | 12                               | 0                               | 0.55                           |
| 1/7/04           | 0.013                            | 3                               | 1095                             | 344                              | 36                              | 411                              | 2.64                          | 34                               | 12                               | 0                               | 0.55                           |
| 2/10/04          | 0.012                            | 4                               | 1093                             | 357                              | 41                              | 410                              | 2.67                          | 102                              | 12                               | 0                               | 0.56                           |

Table-24. Time series water level data (m) for shallow and deep wells at site C

| Date of Measurement | Wells at different depths |     |      |      |      |
|---------------------|---------------------------|-----|------|------|------|
|                     | 5 m                       | 8 m | 11 m | 14 m | 53 m |
| 3/16/2002           | 2.9                       | 2.9 | 2.9  | 2.9  | 1.0  |
| 3/30/2002           | 3.0                       | 3.0 | 3.0  | 3.0  | 1.5  |
| 4/13/2002           | 3.1                       | 3.1 | 3.1  | 3.1  | 1.8  |
| 4/27/2002           | 3.3                       | 3.3 | 3.3  | 3.3  | 2.0  |
| 5/12/2002           | 3.6                       | 3.6 | 3.6  | 3.6  | 2.3  |
| 6/15/2002           | 4.7                       | 4.7 | 4.7  | 4.7  | 3.4  |
| 6/20/2002           | 6.1                       | 6.1 | 6.1  | 6.1  | 4.9  |
| 9/15/2002           | 5.9                       | 5.9 | 5.9  | 5.9  | 4.9  |
| 9/21/2002           | 5.6                       | 5.6 | 5.6  | 5.6  | 4.7  |
| 10/21/2002          | 5.4                       | 5.4 | 5.4  | 5.4  | 4.3  |
| 11/26/2002          | 4.9                       | 4.9 | 4.9  | 4.9  | 3.8  |
| 1/13/2003           | 3.9                       | 3.9 | 3.9  | 3.9  | 2.7  |
| 2/1/2003            | 3.6                       | 3.6 | 3.6  | 3.6  | 1.7  |
| 2/15/2003           | 3.3                       | 3.3 | 3.3  | 3.3  | 1.7  |
| 3/2/2003            | 3.1                       | 3.1 | 3.1  | 3.1  | 1.1  |
| 3/15/2003           | 3.0                       | 3.0 | 3.0  | 3.0  | 1.1  |
| 3/31/2003           | 3.2                       | 3.2 | 3.2  | 3.2  | 2.4  |
| 4/12/2003           | 3.1                       | 3.1 | 3.0  | 3.0  | 1.4  |
| 4/26/2003           | 3.1                       | 3.1 | 3.1  | 3.2  | 1.5  |
| 5/11/2003           | 3.5                       | 3.5 | 3.5  | 3.5  | 2.1  |
| 5/24/2003           | 3.6                       | 3.6 | 3.6  | 3.6  | 2.2  |
| 6/7/2003            | 3.8                       | 3.8 | 3.8  | 3.8  | 2.5  |
| 6/24/2003           | 5.6                       | 5.6 | 5.6  | 5.6  | 3.4  |
| 7/8/2003            | 5.8                       | 5.8 | 5.8  | 5.8  | 4.2  |
| 7/22/2003           | +                         | +   | +    | +    | +    |
| 8/5/2003            | +                         | +   | +    | +    | +    |
| 8/21/2003           | +                         | +   | +    | +    | +    |
| 9/3/2003            | +                         | +   | +    | +    | +    |
| 9/18/2003           | +                         | +   | +    | +    | +    |
| 10/1/2003           | +                         | +   | +    | +    | +    |
| 10/23/2003          | +                         | +   | +    | +    | +    |
| 11/9/2003           | 5.4                       | 5.4 | 5.4  | 5.4  | 4.3  |
| 11/23/2003          | 4.9                       | 4.9 | 4.9  | 4.9  | 3.8  |
| 12/10/2003          | 4.4                       | 4.4 | 4.4  | 4.4  | 3.5  |
| 12/25/2003          | 4.2                       | 4.2 | 4.2  | 4.2  | 3.2  |
| 1/11/2004           | 4.0                       | 4.0 | 4.0  | 4.0  | 3.0  |
| 1/25/2004           | 3.7                       | 3.7 | 3.7  | 3.7  | 2.1  |
| 2/16/2004           | 3.2                       | 3.2 | 3.2  | 3.2  | 1.1  |
| 2/27/2004           | 3.2                       | 3.1 | 3.1  | 3.1  | 1.1  |

+ Wells were not accessible due to monsoonal flood



Table-25. Time series data for As and other ions in shallow well at site E (depth - 5 m)

| Date of Sampling | As ( $\mu\text{moleL}^{-1}$ ) | P ( $\mu\text{moleL}^{-1}$ ) | Na ( $\mu\text{moleL}^{-1}$ ) | Mg ( $\mu\text{moleL}^{-1}$ ) | K ( $\mu\text{moleL}^{-1}$ ) | Ca ( $\mu\text{moleL}^{-1}$ ) | SMC ( $\text{meqL}^{-1}$ ) | Fe ( $\mu\text{moleL}^{-1}$ ) | Mn ( $\mu\text{moleL}^{-1}$ ) | S ( $\mu\text{moleL}^{-1}$ ) | Cl ( $\text{mmoleL}^{-1}$ ) |
|------------------|-------------------------------|------------------------------|-------------------------------|-------------------------------|------------------------------|-------------------------------|----------------------------|-------------------------------|-------------------------------|------------------------------|-----------------------------|
| 3/16/02          | 0.55                          | 7                            | 413                           | 1033                          | 81                           | 1184                          | 4.93                       | 67                            | 19                            | 206                          | 0.18                        |
| 4/13/02          | 0.56                          | 7                            | 418                           | 1040                          | 76                           | 1162                          | 4.90                       | 31                            | 17                            | 209                          | 0.19                        |
| 5/12/02          | 0.60                          | 7                            | 408                           | 1044                          | 76                           | 1190                          | 4.95                       | 35                            | 19                            | 266                          | 0.15                        |
| 6/15/02          | 0.63                          | 8                            | 451                           | 1052                          | 80                           | 1216                          | 5.07                       | 46                            | 20                            | 236                          | 0.16                        |
| 11/26/02         | 0.61                          | 4                            | 364                           | 751                           | 65                           | 825                           | 3.58                       | 72                            | 13                            | 149                          | 0.15                        |
| 1/12/03          | 0.58                          | 8                            | 379                           | 837                           | 72                           | 1093                          | 4.31                       | 49                            | 18                            | 183                          | 0.17                        |
| 1/26/03          | 0.57                          | 8                            | 502                           | 1357                          | 82                           | 1472                          | 6.24                       | 45                            | 21                            | 443                          | -                           |
| 2/8/03           | 0.55                          | 7                            | 485                           | 1242                          | 79                           | 1321                          | 5.69                       | 46                            | 19                            | 312                          | -                           |
| 3/8/03           | 0.57                          | 8                            | 490                           | 1220                          | 78                           | 1319                          | 5.65                       | 45                            | 18                            | 313                          | -                           |
| 4/15/03          | 0.53                          | 8                            | 464                           | 1110                          | 75                           | 1204                          | 5.17                       | 40                            | 17                            | 238                          | -                           |
| 5/2/03           | 0.56                          | 9                            | 456                           | 1120                          | 76                           | 1196                          | 5.17                       | 57                            | 18                            | 237                          | -                           |
| 6/2/03           | 0.60                          | 9                            | 419                           | 1037                          | 74                           | 1132                          | 4.83                       | 59                            | 18                            | 199                          | -                           |
| 7/6/03           | 0.59                          | 9                            | 413                           | 943                           | 71                           | 1055                          | 4.48                       | 46                            | 18                            | 164                          | -                           |
| 11/3/03          | 0.57                          | 8                            | 421                           | 988                           | 74                           | 1059                          | 4.59                       | 50                            | 16                            | 177                          | 0.14                        |
| 12/9/03          | 0.55                          | 7                            | 422                           | 980                           | 72                           | 1080                          | 4.61                       | 31                            | 15                            | 180                          | 0.14                        |
| 1/7/04           | 0.54                          | 7                            | 425                           | 990                           | 74                           | 1123                          | 4.72                       | 46                            | 14                            | 198                          | 0.15                        |

Table-26. Time series data for As and other ions in shallow well at site E (depth - 8 m)

| Date of Sampling | As ( $\mu\text{moleL}^{-1}$ ) | P ( $\mu\text{moleL}^{-1}$ ) | Na ( $\mu\text{moleL}^{-1}$ ) | Mg ( $\mu\text{moleL}^{-1}$ ) | K ( $\mu\text{moleL}^{-1}$ ) | Ca ( $\mu\text{moleL}^{-1}$ ) | SMC ( $\text{meqL}^{-1}$ ) | Fe ( $\mu\text{moleL}^{-1}$ ) | Mn ( $\mu\text{moleL}^{-1}$ ) | S ( $\mu\text{moleL}^{-1}$ ) | Cl ( $\text{mmoleL}^{-1}$ ) |
|------------------|-------------------------------|------------------------------|-------------------------------|-------------------------------|------------------------------|-------------------------------|----------------------------|-------------------------------|-------------------------------|------------------------------|-----------------------------|
| 3/16/02          | 0.98                          | 24                           | 386                           | 775                           | 75                           | 811                           | 3.63                       | 333                           | 35                            | 108                          | 0.13                        |
| 4/13/02          | 1.09                          | 27                           | 421                           | 876                           | 77                           | 870                           | 3.99                       | 453                           | 39                            | 132                          | 0.13                        |
| 5/12/02          | 1.11                          | 26                           | 398                           | 806                           | 76                           | 826                           | 3.74                       | 375                           | 35                            | 86                           | 0.13                        |
| 6/15/02          | 1.11                          | 29                           | 362                           | 646                           | 71                           | 698                           | 3.12                       | 378                           | 29                            | 15                           | 0.11                        |
| 11/26/02         | 1.13                          | 28                           | 335                           | 571                           | 58                           | 568                           | 2.67                       | 460                           | 26                            | 44                           | 0.10                        |
| 1/12/03          | 1.21                          | 27                           | 323                           | 581                           | 69                           | 695                           | 2.95                       | 347                           | 29                            | 22                           | 0.12                        |
| 1/26/03          | 1.09                          | 28                           | 417                           | 850                           | 74                           | 851                           | 3.89                       | 426                           | 35                            | 75                           | -                           |
| 2/8/03           | 1.07                          | 25                           | 431                           | 932                           | 75                           | 902                           | 4.17                       | 443                           | 37                            | 115                          | -                           |
| 3/8/03           | 1.05                          | 25                           | 435                           | 963                           | 76                           | 949                           | 4.34                       | 454                           | 40                            | 138                          | -                           |
| 4/15/03          | 1.07                          | 23                           | 447                           | 987                           | 78                           | 1003                          | 4.50                       | 466                           | 41                            | 140                          | -                           |
| 5/2/03           | 1.12                          | 28                           | 429                           | 882                           | 76                           | 860                           | 3.99                       | 460                           | 36                            | 85                           | -                           |
| 6/2/03           | 1.14                          | 30                           | 400                           | 715                           | 73                           | 786                           | 3.48                       | 409                           | 32                            | 38                           | -                           |
| 7/6/03           | 1.13                          | 29                           | 429                           | 866                           | 79                           | 947                           | 4.13                       | 506                           | 39                            | 89                           | -                           |
| 11/3/03          | 1.00                          | 31                           | 417                           | 717                           | 75                           | 820                           | 3.57                       | 410                           | 32                            | 37                           | 0.12                        |
| 12/9/03          | 1.15                          | 27                           | 419                           | 745                           | 73                           | 800                           | 3.58                       | 405                           | 33                            | 43                           | 0.10                        |
| 1/7/04           | 1.02                          | 24                           | 441                           | 941                           | 75                           | 961                           | 4.32                       | 464                           | 40                            | 116                          | 0.10                        |

Table-27. Time series data for As and other ions in shallow well at site E (depth - 11 m)

| Date of Sampling | As ( $\mu\text{moleL}^{-1}$ ) | P ( $\mu\text{moleL}^{-1}$ ) | Na ( $\mu\text{moleL}^{-1}$ ) | Mg ( $\mu\text{moleL}^{-1}$ ) | K ( $\mu\text{moleL}^{-1}$ ) | Ca ( $\mu\text{moleL}^{-1}$ ) | SMC ( $\text{meqL}^{-1}$ ) | Fe ( $\mu\text{moleL}^{-1}$ ) | Mn ( $\mu\text{moleL}^{-1}$ ) | S ( $\mu\text{moleL}^{-1}$ ) | Cl ( $\text{mmoleL}^{-1}$ ) |
|------------------|-------------------------------|------------------------------|-------------------------------|-------------------------------|------------------------------|-------------------------------|----------------------------|-------------------------------|-------------------------------|------------------------------|-----------------------------|
| 3/16/02          | 2.25                          | 29                           | 701                           | 809                           | 110                          | 1136                          | 4.70                       | 89                            | 31                            | 3                            | 0.08                        |
| 4/13/02          | 1.85                          | 27                           | 554                           | 786                           | 107                          | 1154                          | 4.54                       | 196                           | 36                            | 4                            | 0.08                        |
| 5/12/02          | 1.98                          | 30                           | 521                           | 788                           | 109                          | 1140                          | 4.49                       | 249                           | 39                            | <0.03                        | 0.08                        |
| 6/15/02          | 2.10                          | 35                           | 507                           | 762                           | 109                          | 1133                          | 4.41                       | 329                           | 37                            | <0.03                        | 0.07                        |
| 11/26/02         | 2.02                          | 30                           | 372                           | 603                           | 86                           | 900                           | 3.46                       | 312                           | 26                            | 2                            | 0.07                        |
| 1/12/03          | 2.21                          | 30                           | 690                           | 702                           | 103                          | 1083                          | 4.36                       | 545                           | 27                            | 1                            | 0.07                        |
| 1/26/03          | 2.29                          | 28                           | 493                           | 729                           | 107                          | 1065                          | 4.19                       | 458                           | 34                            | 1                            | -                           |
| 2/8/03           | 2.24                          | 26                           | 467                           | 698                           | 107                          | 1056                          | 4.08                       | 430                           | 33                            | 2                            | -                           |
| 3/8/03           | 2.22                          | 28                           | 467                           | 704                           | 106                          | 1048                          | 4.08                       | 455                           | 33                            | 1                            | -                           |
| 4/15/03          | 2.23                          | 27                           | 466                           | 725                           | 106                          | 1032                          | 4.08                       | 439                           | 32                            | 1                            | -                           |
| 5/2/03           | 2.34                          | 28                           | 476                           | 717                           | 107                          | 1032                          | 4.08                       | 463                           | 32                            | 1                            | -                           |
| 6/2/03           | 2.37                          | 28                           | 460                           | 719                           | 107                          | 1068                          | 4.14                       | 478                           | 33                            | 2                            | -                           |
| 7/6/03           | 2.32                          | 29                           | 471                           | 713                           | 108                          | 1067                          | 4.14                       | 452                           | 32                            | 1                            | -                           |
| 11/3/03          | 2.34                          | 28                           | 462                           | 696                           | 109                          | 1048                          | 4.06                       | 474                           | 33                            | 1                            | 0.07                        |
| 12/9/03          | 2.41                          | 26                           | 480                           | 716                           | 108                          | 1073                          | 4.17                       | 463                           | 32                            | 1                            | 0.07                        |
| 1/7/04           | 2.29                          | 28                           | 461                           | 708                           | 108                          | 1067                          | 4.12                       | 447                           | 31                            | <0.03                        | 0.07                        |

Table-28. Time series data for As and other ions in shallow well at site E (depth - 14 m)

| Date of Sampling | As ( $\mu\text{moleL}^{-1}$ ) | P ( $\mu\text{moleL}^{-1}$ ) | Na ( $\mu\text{moleL}^{-1}$ ) | Mg ( $\mu\text{moleL}^{-1}$ ) | K ( $\mu\text{moleL}^{-1}$ ) | Ca ( $\mu\text{moleL}^{-1}$ ) | SMC (meqL <sup>-1</sup> ) | Fe ( $\mu\text{moleL}^{-1}$ ) | Mn ( $\mu\text{moleL}^{-1}$ ) | S ( $\mu\text{moleL}^{-1}$ ) | Cl (mmoleL <sup>-1</sup> ) |
|------------------|-------------------------------|------------------------------|-------------------------------|-------------------------------|------------------------------|-------------------------------|---------------------------|-------------------------------|-------------------------------|------------------------------|----------------------------|
| 3/16/02          | 2.20                          | 22                           | 1244                          | 821                           | 90                           | 1247                          | 5.47                      | 206                           | 21                            | 3                            | 0.82                       |
| 4/13/02          | 2.12                          | 25                           | 1245                          | 814                           | 91                           | 1309                          | 5.58                      | 357                           | 26                            | 3                            | 0.79                       |
| 5/12/02          | 2.55                          | 28                           | 1226                          | 805                           | 87                           | 1331                          | 5.58                      | 367                           | 26                            | 1                            | 0.77                       |
| 6/15/02          | 2.59                          | 30                           | 1268                          | 820                           | 87                           | 1307                          | 5.61                      | 470                           | 23                            | 1                            | 0.76                       |
| 11/26/02         | 1.99                          | 22                           | 1665                          | 711                           | 101                          | 1226                          | 5.64                      | 552                           | 14                            | 1                            | 0.83                       |
| 1/12/03          | 2.10                          | 25                           | 1172                          | 739                           | 67                           | 1205                          | 5.13                      | 474                           | 15                            | 1                            | 0.81                       |
| 1/26/03          | 2.17                          | 26                           | 1102                          | 693                           | 72                           | 1170                          | 4.90                      | 528                           | 15                            | 1                            | -                          |
| 2/8/03           | 2.00                          | 22                           | 1117                          | 1063                          | 126                          | 1245                          | 5.86                      |                               | 22                            | 2                            | -                          |
| 3/8/03           | 2.34                          | 27                           | 1152                          | 990                           | 115                          | 1255                          | 5.76                      | 855                           | 20                            | 2                            | -                          |
| 4/15/03          | 2.27                          | 26                           | 1071                          | 700                           | 79                           | 1152                          | 4.85                      | 591                           | 14                            | 1                            | -                          |
| 5/2/03           | 2.10                          | 24                           | 1010                          | 677                           | 68                           | 1158                          | 4.75                      | 455                           | 14                            | 1                            | -                          |
| 6/2/03           | 2.13                          | 25                           | 1033                          | 703                           | 74                           | 1153                          | 4.82                      | 578                           | 14                            | 1                            | -                          |
| 7/6/03           | 2.05                          | 24                           | 1037                          | 677                           | 70                           | 1156                          | 4.77                      | 591                           | 13                            | 1                            | -                          |
| 11/3/03          | 1.94                          | 23                           | 1039                          | 667                           | 67                           | 1125                          | 4.69                      | 459                           | 13                            | 1                            | 0.75                       |
| 12/9/03          | 2.18                          | 23                           | 1005                          | 656                           | 66                           | 1132                          | 4.65                      | 538                           | 13                            | 1                            | 0.76                       |
| 1/7/04           | 1.92                          | 22                           | 1023                          | 671                           | 65                           | 1122                          | 4.67                      | 441                           | 13                            | 1                            | 0.75                       |

Table-29. Time series data for As and other ions in deep well at site E (depth - 38 m)

| Date of Sampling | As ( $\mu\text{moleL}^{-1}$ ) | P ( $\mu\text{moleL}^{-1}$ ) | Na ( $\mu\text{moleL}^{-1}$ ) | Mg ( $\mu\text{moleL}^{-1}$ ) | K ( $\mu\text{moleL}^{-1}$ ) | Ca ( $\mu\text{moleL}^{-1}$ ) | SMC (meqL <sup>-1</sup> ) | Fe ( $\mu\text{moleL}^{-1}$ ) | Mn ( $\mu\text{moleL}^{-1}$ ) | S ( $\mu\text{moleL}^{-1}$ ) | Cl (mmoleL <sup>-1</sup> ) |
|------------------|-------------------------------|------------------------------|-------------------------------|-------------------------------|------------------------------|-------------------------------|---------------------------|-------------------------------|-------------------------------|------------------------------|----------------------------|
| 3/16/02          | 0.005                         | 3                            | 2748                          | 843                           | 80                           | 821                           | 6.16                      | 60                            | 7                             | <0.03                        | 1.21                       |
| 4/13/02          | 0.005                         | 3                            | 2849                          | 842                           | 80                           | 831                           | 6.27                      | 40                            | 9                             | <0.03                        | 1.22                       |
| 5/12/02          | 0.005                         | 3                            | 3056                          | 801                           | 73                           | 772                           | 6.28                      | 60                            | 8                             | <0.03                        | 1.21                       |
| 6/15/02          | 0.005                         | 3                            | 3114                          | 770                           | 70                           | 745                           | 6.21                      | 86                            | 8                             | <0.03                        | 1.20                       |
| 11/26/02         | 0.004                         | 3                            | 2370                          | 588                           | 59                           | 1062                          | 5.73                      | 66                            | 6                             | <0.03                        | 1.16                       |
| 1/12/03          | 0.005                         | 2                            | 2572                          | 609                           | 49                           | 974                           | 5.79                      | 53                            | 6                             | <0.03                        | 1.24                       |
| 1/26/03          | 0.004                         | 2                            | 2478                          | 609                           | 49                           | 998                           | 5.74                      | 38                            | 4                             | <0.03                        | -                          |
| 2/8/03           | 0.005                         | 3                            | 2449                          | 619                           | 50                           | 1043                          | 5.82                      | 29                            | 4                             | <0.03                        | -                          |
| 3/8/03           | 0.004                         | 3                            | 2412                          | 620                           | 48                           | 1002                          | 5.70                      | 42                            | 4                             | <0.03                        | -                          |
| 4/15/03          | 0.004                         | 3                            | 2320                          | 604                           | 49                           | 988                           | 5.55                      | 43                            | 4                             | <0.03                        | -                          |
| 5/2/03           | 0.004                         | 3                            | 2276                          | 598                           | 49                           | 985                           | 5.49                      | 46                            | 4                             | <0.03                        | -                          |
| 6/2/03           | 0.005                         | 3                            | 2273                          | 606                           | 47                           | 965                           | 5.46                      | 33                            | 4                             | <0.03                        | -                          |
| 7/6/03           | 0.004                         | 3                            | 2216                          | 587                           | 46                           | 951                           | 5.34                      | 94                            | 4                             | <0.03                        | -                          |
| 11/3/03          | 0.004                         | 3                            | 2144                          | 586                           | 55                           | 968                           | 5.31                      | 76                            | 4                             | <0.03                        | 1.19                       |
| 12/9/03          | 0.005                         | 3                            | 2231                          | 607                           | 45                           | 997                           | 5.48                      | 67                            | 4                             | <0.03                        | 1.25                       |
| 1/7/04           | 0.004                         |                              | 2235                          | 620                           | 109                          | 989                           | 5.56                      | 71                            | 4                             | <0.03                        | 1.26                       |

Table-30. Time series water level data (m) for shallow and deep wells at site E

| Date of Measurement | Wells at different depths |     |      |      |      |
|---------------------|---------------------------|-----|------|------|------|
|                     | 5 m                       | 8 m | 11 m | 14 m | 38 m |
| 3/16/2002           | 2.9                       | 2.9 | 2.9  | 2.9  | 2.7  |
| 3/30/2002           | 3.0                       | 3.0 | 3.0  | 3.0  | 2.9  |
| 4/13/2002           | 3.0                       | 3.0 | 3.0  | 3.0  | 2.9  |
| 4/27/2002           | 3.3                       | 3.3 | 3.3  | 3.3  | 3.2  |
| 5/12/2002           | 3.6                       | 3.6 | 3.6  | 3.5  | 3.5  |
| 6/15/2002           | 5.1                       | 5.1 | 5.1  | 5.1  | 5.0  |
| 10/21/2002          | 5.3                       | 5.3 | 5.3  | 5.2  | 5.2  |
| 11/26/2002          | 4.7                       | 4.7 | 4.7  | 4.7  | 4.7  |
| 1/12/2003           | 3.8                       | 3.8 | 3.8  | 3.8  | 3.7  |
| 2/1/2003            | 3.3                       | 3.3 | 3.3  | 3.3  | 3.2  |
| 2/15/2003           | 3.2                       | 3.2 | 3.2  | 3.2  | 3.1  |
| 3/2/2003            | 3.0                       | 3.0 | 3.0  | 3.0  | 2.9  |
| 3/15/2003           | 2.9                       | 2.9 | 2.9  | 2.9  | 2.8  |
| 3/31/2003           | 2.9                       | 2.9 | 2.9  | 2.9  | 2.8  |
| 4/12/2003           | 3.0                       | 3.0 | 3.0  | 3.0  | 2.8  |
| 4/26/2003           | 3.0                       | 3.0 | 3.0  | 3.0  | 2.9  |
| 5/11/2003           | 3.4                       | 3.4 | 3.4  | 3.4  | 3.3  |
| 5/24/2003           | 3.4                       | 3.4 | 3.5  | 3.4  | 3.4  |
| 6/7/2003            | 3.7                       | 3.7 | 3.7  | 3.6  | 3.6  |
| 6/24/2003           | 5.6                       | 5.6 | 5.6  | 5.6  | 5.4  |
| 7/8/2003            | 5.7                       | 5.7 | 5.7  | 5.7  | 5.6  |
| 7/22/2003           | +                         | +   | +    | +    | +    |
| 8/5/2003            | 6.3                       | 6.3 | 6.3  | 6.2  | 6.2  |
| 8/21/2003           | 6.0                       | 6.0 | 6.0  | 6.0  | 5.9  |
| 9/3/2003            | 6.0                       | 6.0 | 6.0  | 6.0  | 6.0  |
| 9/18/2003           | 6.0                       | 6.0 | 6.0  | 6.0  | 5.9  |
| 11/9/2003           | 5.3                       | 5.3 | 5.3  | 5.2  | 5.2  |
| 11/23/2003          | 4.6                       | 4.6 | 4.6  | 4.6  | 4.6  |
| 12/10/2003          | 4.2                       | 4.2 | 4.2  | 4.2  | 4.2  |
| 12/25/2003          | 4.0                       | 4.1 | 4.1  | 4.0  | 4.0  |
| 1/11/2004           | 3.9                       | 3.9 | 3.9  | 3.8  | 3.8  |
| 1/25/2004           | 3.6                       | 3.6 | 3.6  | 3.6  | 3.5  |
| 2/16/2004           | 3.1                       | 3.1 | 3.1  | 3.1  | 2.9  |
| 2/27/2004           | 3.1                       | 3.1 | 3.1  | 3.0  | 2.9  |

+ Well was not accessible due to monsoonal flood

Table-31. Time series data for As and other ions in shallow well at site F (depth - 6 m)

| Date of Sampling | As ( $\mu\text{moleL}^{-1}$ ) | P ( $\mu\text{moleL}^{-1}$ ) | Na ( $\mu\text{moleL}^{-1}$ ) | Mg ( $\mu\text{moleL}^{-1}$ ) | K ( $\mu\text{moleL}^{-1}$ ) | Ca ( $\mu\text{moleL}^{-1}$ ) | SMC (meqL <sup>-1</sup> ) | Fe ( $\mu\text{moleL}^{-1}$ ) | Mn ( $\mu\text{moleL}^{-1}$ ) | S ( $\mu\text{moleL}^{-1}$ ) | Cl (mmoleL <sup>-1</sup> ) |
|------------------|-------------------------------|------------------------------|-------------------------------|-------------------------------|------------------------------|-------------------------------|---------------------------|-------------------------------|-------------------------------|------------------------------|----------------------------|
| 3/9/02           | 0.00                          | 0                            | 218                           | 315                           | 51                           | 334                           | 1.57                      | 1                             | <0.002                        | 111                          | 0.22                       |
| 4/7/02           | 0.00                          | 0                            | 237                           | 235                           | 42                           | 222                           | 1.19                      | 2                             | <0.002                        | 38                           | 0.16                       |
| 5/5/02           | 0.00                          | 0                            | 180                           | 302                           | 52                           | 338                           | 1.51                      | 1                             | <0.002                        | 64                           | 0.18                       |
| 6/8/02           | 0.00                          | 0                            | 179                           | 284                           | 49                           | 326                           | 1.45                      | 2                             | 4                             | 38                           | 0.19                       |
| 7/6/02           | 0.00                          | 0                            | 142                           | 323                           | 43                           | 348                           | 1.53                      | 4                             | 6                             | 27                           | 0.19                       |
| 8/3/02           | 0.00                          | 0                            | 154                           | 321                           | 46                           | 362                           | 1.57                      | 4                             | 5                             | 24                           | 0.17                       |
| 9/7/02           | 0.00                          | 0                            | 159                           | 290                           | 43                           | 271                           | 1.32                      | 5                             | 4                             | 21                           | 0.17                       |
| 10/14/02         | 0.00                          | 0                            | 172                           | 293                           | 47                           | 334                           | 1.47                      | 1                             | 3                             | 29                           | 0.24                       |
| 11/10/02         | 0.00                          | 0                            | 261                           | 400                           | 52                           | 371                           | 1.86                      | 5                             | 2                             | 63                           | 0.31                       |
| 12/1/02          | 0.00                          | 0                            | 161                           | 351                           | 51                           | 320                           | 1.55                      | 4                             | 2                             | 41                           | 0.29                       |
| 1/7/03           | 0.00                          | 0                            | 324                           | 438                           | 62                           | 511                           | 2.28                      |                               | <0.002                        | 60                           | 0.34                       |
| 3/1/03           | 0.00                          | 0                            | 278                           | 330                           | 52                           | 404                           | 1.80                      | 3                             | <0.002                        | 65                           | 0.42                       |
| 3/30/03          | 0.00                          | 0                            | 210                           | 314                           | 49                           | 368                           | 1.62                      |                               | <0.002                        | 60                           | 0.30                       |
| 4/29/03          | 0.00                          | 0                            | 127                           | 295                           | 49                           | 341                           | 1.45                      | 1                             | <0.002                        | 16                           | 0.22                       |
| 5/28/03          | 0.00                          | 0                            | 118                           | 293                           | 46                           | 332                           | 1.41                      | 0                             | 3                             | 14                           | 0.23                       |
| 6/30/03          | 0.00                          | 0                            | 117                           | 294                           | 45                           | 317                           | 1.39                      | 1                             | 5                             | 16                           | 0.24                       |
| 7/31/03          | 0.00                          | 0                            | 133                           | 347                           | 48                           | 395                           | 1.66                      | 0                             | 6                             | 5                            | 0.24                       |
| 8/31/03          | 0.00                          | 0                            | 141                           | 400                           | 51                           | 451                           | 1.89                      | 7                             | 5                             | 13                           | 0.23                       |
| 12/8/03          | 0.00                          | 0                            | 215                           | 367                           | 65                           | 407                           | 1.83                      | 6                             | 3                             | 33                           | 0.26                       |
| 1/8/04           | 0.00                          | 0                            | 191                           | 367                           | 62                           | 411                           | 1.81                      | 2                             | 2                             | 17                           | 0.25                       |
| 2/10/04          | 0.00                          | 0                            | 318                           | 381                           | 65                           | 428                           | 2.00                      | 3                             | <0.002                        | 30                           | 0.28                       |

Table-32. Time series data for As and other ions in shallow well at site F (depth - 11 m)

| Date of Sampling | As ( $\mu\text{moleL}^{-1}$ ) | P ( $\mu\text{moleL}^{-1}$ ) | Na ( $\mu\text{moleL}^{-1}$ ) | Mg ( $\mu\text{moleL}^{-1}$ ) | K ( $\mu\text{moleL}^{-1}$ ) | Ca ( $\mu\text{moleL}^{-1}$ ) | SMC (meqL <sup>-1</sup> ) | Fe ( $\mu\text{moleL}^{-1}$ ) | Mn ( $\mu\text{moleL}^{-1}$ ) | S ( $\mu\text{moleL}^{-1}$ ) | Cl (mmoleL <sup>-1</sup> ) |
|------------------|-------------------------------|------------------------------|-------------------------------|-------------------------------|------------------------------|-------------------------------|---------------------------|-------------------------------|-------------------------------|------------------------------|----------------------------|
| 3/9/02           | 0.41                          | 2                            | 109                           | 209                           | 51                           | 222                           | 1.02                      | 25                            | 15                            | 6                            | 0.06                       |
| 4/7/02           | 0.47                          | 2                            | 126                           | 328                           | 61                           | 334                           | 1.51                      | 39                            | 27                            | 46                           | 0.17                       |
| 5/5/02           | 0.50                          | 2                            | 148                           | 417                           | 69                           | 459                           | 1.97                      | 76                            | 38                            | 36                           | 0.22                       |
| 6/8/02           | 0.58                          | 2                            | 150                           | 394                           | 71                           | 436                           | 1.88                      | 63                            | 39                            | 45                           | 0.23                       |
| 7/6/02           | 0.56                          | 4                            | 150                           | 385                           | 68                           | 437                           | 1.86                      | 85                            | 30                            | 26                           | 0.22                       |
| 8/3/02           | 0.47                          | 3                            | 150                           | 352                           | 66                           | 388                           | 1.70                      | 120                           | 28                            | 33                           | 0.24                       |
| 9/7/02           | 0.43                          | 3                            | 126                           | 334                           | 57                           | 375                           | 1.60                      | 91                            | 24                            | 14                           | 0.22                       |
| 10/14/02         | 0.45                          | 3                            | 132                           | 350                           | 59                           | 394                           | 1.68                      | 96                            | 26                            | 15                           | 0.23                       |
| 11/10/02         | 0.52                          | 2                            | 116                           | 306                           | 52                           | 298                           | 1.38                      | 50                            | 23                            | 26                           | 0.16                       |
| 12/1/02          | 0.50                          | 2                            | 114                           | 287                           | 50                           | 285                           | 1.31                      | 42                            | 21                            | 24                           | 0.16                       |
| 2/1/03           | 0.41                          | 2                            | 133                           | 311                           | 56                           | 314                           | 1.44                      | 49                            | 22                            | 13                           | 0.20                       |
| 3/1/03           | 0.43                          | 2                            | 119                           | 317                           | 59                           | 350                           | 1.51                      | 51                            | 23                            | 14                           | 0.20                       |
| 3/30/03          | 0.42                          | 2                            | 125                           | 333                           | 62                           | 386                           | 1.62                      | 43                            | 26                            | 21                           | 0.12                       |
| 4/29/03          | 0.45                          | 2                            | 137                           | 373                           | 63                           | 594                           | 2.13                      | 58                            | 40                            | 34                           | 0.19                       |
| 5/28/03          | 0.45                          | 1                            | 171                           | 467                           | 70                           | 493                           | 2.16                      | 55                            | 41                            | 39                           | 0.19                       |
| 6/30/03          | 0.44                          | 1                            | 174                           | 494                           | 74                           | 452                           | 2.14                      | 61                            | 48                            | 60                           | 0.22                       |
| 7/31/03          | 0.46                          | 2                            | 171                           | 520                           | 70                           | 424                           | 2.13                      | 65                            | 41                            | 10                           | 0.24                       |
| 8/31/03          | 0.48                          | 2                            | 149                           | 485                           | 60                           | 469                           | 2.12                      | 78                            | 38                            | 7                            | 0.24                       |
| 12/8/03          | 0.48                          | 2                            | 157                           | 502                           | 61                           | 312                           | 1.84                      | 62                            | 33                            | 17                           | 0.17                       |
| 1/8/04           | 0.48                          | 2                            | 155                           | 383                           | 72                           | 478                           | 1.95                      | 63                            | 35                            | 10                           | 0.18                       |
| 2/10/04          | 0.46                          | 2                            | 162                           | 406                           | 74                           | 362                           | 1.77                      | 51                            | 30                            | 0                            | 0.23                       |

Table-33. Time series data for As and other ions in shallow well at site F (depth - 15 m)

| Date of Sampling | As ( $\mu\text{moleL}^{-1}$ ) | P ( $\mu\text{moleL}^{-1}$ ) | Na ( $\mu\text{moleL}^{-1}$ ) | Mg ( $\mu\text{moleL}^{-1}$ ) | K ( $\mu\text{moleL}^{-1}$ ) | Ca ( $\mu\text{moleL}^{-1}$ ) | SMC (meqL <sup>-1</sup> ) | Fe ( $\mu\text{moleL}^{-1}$ ) | Mn ( $\mu\text{moleL}^{-1}$ ) | S ( $\mu\text{moleL}^{-1}$ ) | Cl (mmoleL <sup>-1</sup> ) |
|------------------|-------------------------------|------------------------------|-------------------------------|-------------------------------|------------------------------|-------------------------------|---------------------------|-------------------------------|-------------------------------|------------------------------|----------------------------|
| 3/9/02           | 0.68                          | 4                            | 159                           | 422                           | 47                           | 574                           | 2.20                      | 16                            | 22                            | 37                           | 0.07                       |
| 4/7/02           | 0.76                          | 4                            | 151                           | 458                           | 46                           | 628                           | 2.37                      | 21                            | 24                            | 23                           | 0.07                       |
| 5/5/02           | 0.58                          | 3                            | 155                           | 445                           | 47                           | 593                           | 2.28                      | 38                            | 22                            | 24                           | 0.06                       |
| 6/8/02           | 0.71                          | 3                            | 144                           | 476                           | 41                           | 703                           | 2.54                      | 42                            | 30                            | 13                           | 0.08                       |
| 7/6/02           | 0.78                          | 6                            | 142                           | 477                           | 49                           | 640                           | 2.43                      | 68                            | 27                            | 16                           | 0.06                       |
| 8/3/02           | 0.65                          | 5                            | 142                           | 479                           | 48                           | 637                           | 2.42                      | 71                            | 27                            | 15                           | 0.07                       |
| 9/7/02           | 0.58                          | 4                            | 145                           | 489                           | 49                           | 618                           | 2.41                      | 61                            | 27                            | 12                           | 0.06                       |
| 10/14/02         | 0.62                          | 4                            | 148                           | 491                           | 49                           | 627                           | 2.43                      | 51                            | 28                            | 10                           | 0.06                       |
| 11/10/02         | 0.63                          | 2                            | 143                           | 471                           | 53                           | 520                           | 2.18                      | 27                            | 23                            | 15                           | 0.06                       |
| 12/1/02          | 0.64                          | 1                            | 139                           | 424                           | 49                           | 481                           | 2.00                      | 43                            | 24                            | 18                           | 0.07                       |
| 1/7/03           | 0.62                          | 4                            | 130                           | 459                           | 52                           | 626                           | 2.35                      | 10                            | 26                            | 15                           | 0.06                       |
| 2/1/03           | 0.57                          | 3                            | 146                           | 461                           | 47                           | 599                           | 2.31                      | 20                            | 28                            | 15                           | 0.06                       |
| 3/1/03           | 0.68                          | 4                            | 149                           | 473                           | 49                           | 639                           | 2.42                      | 21                            | 29                            | 22                           | 0.07                       |
| 3/30/03          | 0.68                          | 4                            | 154                           | 495                           | 49                           | 625                           | 2.44                      | 24                            | 30                            | 34                           | 0.07                       |
| 4/29/03          | 0.68                          | 5                            | 146                           | 475                           | 48                           | 621                           | 2.39                      | 21                            | 28                            | 19                           | 0.07                       |
| 5/28/03          | 0.75                          | 4                            | 152                           | 491                           | 48                           | 678                           | 2.54                      | 23                            | 30                            | 0                            | 0.07                       |
| 6/30/03          | 0.75                          | 5                            | 150                           | 492                           | 48                           | 694                           | 2.57                      | 22                            | 30                            | 5                            | 0.07                       |
| 7/31/03          | 0.72                          | 4                            | 147                           | 471                           | 49                           | 669                           | 2.48                      | 20                            | 30                            | 5                            | 0.07                       |
| 8/31/03          | 0.74                          | 4                            | 143                           | 469                           | 49                           | 653                           | 2.44                      | 26                            | 31                            | 6                            | 0.07                       |
| 12/8/03          | 0.71                          | 4                            | 161                           | 475                           | 65                           | 660                           | 2.50                      | 26                            | 29                            | 8                            | 0.06                       |
| 1/8/04           | 0.72                          | 4                            | 166                           | 468                           | 65                           | 663                           | 2.49                      | 21                            | 30                            | 11                           | 0.06                       |
| 2/10/04          | 0.63                          | 4                            | 151                           | 390                           | 62                           | 544                           | 2.08                      | 11                            | 24                            | 14                           | 0.08                       |

Table-34. Time series data for As and other ions in shallow well at site F (depth - 19 m)

| Date of Sampling | As ( $\mu\text{moleL}^{-1}$ ) | P ( $\mu\text{moleL}^{-1}$ ) | Na ( $\mu\text{moleL}^{-1}$ ) | Mg ( $\mu\text{moleL}^{-1}$ ) | K ( $\mu\text{moleL}^{-1}$ ) | Ca ( $\mu\text{moleL}^{-1}$ ) | SMC ( $\text{meqL}^{-1}$ ) | Fe ( $\mu\text{moleL}^{-1}$ ) | Mn ( $\mu\text{moleL}^{-1}$ ) | S ( $\mu\text{moleL}^{-1}$ ) | Cl ( $\text{mmoleL}^{-1}$ ) |
|------------------|-------------------------------|------------------------------|-------------------------------|-------------------------------|------------------------------|-------------------------------|----------------------------|-------------------------------|-------------------------------|------------------------------|-----------------------------|
| 3/9/02           | 3.06                          | 18                           | 353                           | 662                           | 58                           | 1066                          | 3.87                       | 17                            | 42                            | 42                           | 0.04                        |
| 4/7/02           | 3.07                          | 18                           | 359                           | 655                           | 57                           | 1035                          | 3.79                       | 23                            | 43                            | 32                           | 0.03                        |
| 5/5/02           | 3.16                          | 19                           | 347                           | 623                           | 57                           | 1029                          | 3.71                       | 55                            | 41                            | 38                           | 0.03                        |
| 6/8/02           | 2.95                          | 18                           | 380                           | 721                           | 72                           | 1172                          | 4.24                       | 32                            | 39                            | 30                           | 0.04                        |
| 7/6/02           | 3.31                          | 20                           | 364                           | 683                           | 58                           | 1116                          | 4.02                       | 54                            | 43                            | 36                           | 0.03                        |
| 8/3/02           | 3.26                          | 20                           | 362                           | 685                           | 56                           | 1099                          | 3.99                       | 60                            | 42                            | 34                           | 0.03                        |
| 9/7/02           | 3.06                          | 18                           | 361                           | 671                           | 57                           | 1089                          | 3.94                       | 48                            | 41                            | 35                           | 0.03                        |
| 10/14/02         | 2.89                          | 17                           | 347                           | 657                           | 55                           | 1053                          | 3.82                       | 51                            | 41                            | 36                           | 0.03                        |
| 11/10/02         | 2.96                          | 11                           | 322                           | 595                           | 69                           | 825                           | 3.23                       | 22                            | 41                            | 35                           | 0.03                        |
| 12/1/02          | 2.77                          | 9                            | 315                           | 573                           | 66                           | 782                           | 3.09                       | 34                            | 38                            | 31                           | 0.04                        |
| 1/7/03           | 2.54                          | 17                           | 330                           | 613                           | 71                           | 973                           | 3.57                       | 16                            | 47                            | 39                           | 0.04                        |
| 2/1/03           | 2.41                          | 15                           | 350                           | 647                           | 55                           | 1059                          | 3.82                       | 7                             | 43                            | 42                           | 0.04                        |
| 3/1/03           | 2.93                          | 18                           | 355                           | 664                           | 56                           | 1067                          | 3.87                       | 18                            | 45                            | 41                           | 0.04                        |
| 3/30/03          | 2.79                          | 17                           | 339                           | 615                           | 53                           | 994                           | 3.61                       | 13                            | 41                            | 39                           | 0.04                        |
| 4/29/03          | 2.89                          | 18                           | 338                           | 610                           | 53                           | 999                           | 3.61                       | 18                            | 43                            | 38                           | 0.04                        |
| 5/28/03          | 2.99                          | 18                           | 347                           | 635                           | 54                           | 1061                          | 3.79                       | 18                            | 40                            | 36                           | 0.04                        |
| 6/30/03          | 2.91                          | 19                           | 346                           | 632                           | 55                           | 1074                          | 3.81                       | 18                            | 40                            | 38                           | 0.03                        |
| 7/31/03          | 2.54                          | 15                           | 299                           | 552                           | 45                           | 935                           | 3.32                       | 18                            | 40                            | 31                           | 0.04                        |
| 8/31/03          | 2.36                          | 14                           | 279                           | 519                           | 41                           | 928                           | 3.22                       | 16                            | 38                            | 25                           | 0.04                        |
| 12/8/03          | 2.75                          | 18                           | 319                           | 546                           | 80                           | 993                           | 3.48                       | 17                            | 45                            | 30                           | 0.04                        |
| 1/8/04           | 2.69                          | 17                           | 335                           | 587                           | 81                           | 1049                          | 3.69                       | 16                            | 45                            | 33                           | 0.04                        |
| 2/10/04          | 2.69                          | 16                           | 333                           | 573                           | 79                           | 997                           | 3.55                       | 11                            | 44                            | 37                           | 0.04                        |

Table-35. Time series data for As and other ions in shallow well at site F (depth - 26 m)

| Date of Sampling | As ( $\mu\text{moleL}^{-1}$ ) | P ( $\mu\text{moleL}^{-1}$ ) | Na ( $\mu\text{moleL}^{-1}$ ) | Mg ( $\mu\text{moleL}^{-1}$ ) | K ( $\mu\text{moleL}^{-1}$ ) | Ca ( $\mu\text{moleL}^{-1}$ ) | SMC ( $\text{meqL}^{-1}$ ) | Fe ( $\mu\text{moleL}^{-1}$ ) | Mn ( $\mu\text{moleL}^{-1}$ ) | S ( $\mu\text{moleL}^{-1}$ ) | Cl ( $\text{mmoleL}^{-1}$ ) |
|------------------|-------------------------------|------------------------------|-------------------------------|-------------------------------|------------------------------|-------------------------------|----------------------------|-------------------------------|-------------------------------|------------------------------|-----------------------------|
| 11/10/02         | 1.78                          | 30                           | 454                           | 647                           | 111                          | 1168                          | 4.19                       | 292                           | 28                            | 0.28                         | 0.21                        |
| 12/1/02          | 2.85                          | 28                           | 516                           | 594                           | 97                           | 1304                          | 4.41                       | 330                           | 28                            | 0.29                         | 0.21                        |
| 1/7/03           | 2.51                          | 21                           | 432                           | 454                           | 95                           | 1758                          | 4.95                       | 339                           | 35                            | 0.35                         | 0.21                        |
| 2/1/03           | 3.33                          | 34                           | 478                           | 718                           | 77                           | 1692                          | 5.37                       | 382                           | 37                            | 0.35                         | 0.19                        |
| 3/1/03           | 3.21                          | 34                           | 482                           | 724                           | 78                           | 1741                          | 5.49                       | 376                           | 38                            | 0.32                         | 0.23                        |
| 3/30/03          | 3.09                          | 34                           | 478                           | 722                           | 75                           | 1666                          | 5.33                       | 358                           | 37                            | 0.33                         | 0.20                        |
| 4/29/03          | 3.05                          | 34                           | 482                           | 725                           | 75                           | 1710                          | 5.43                       | 350                           | 37                            | 0.33                         | 0.21                        |
| 5/28/03          | 3.09                          | 33                           | 451                           | 697                           | 76                           | 1754                          | 5.43                       | 354                           | 37                            | 0.34                         | 0.21                        |
| 6/30/03          | 3.05                          | 33                           | 472                           | 708                           | 76                           | 1735                          | 5.43                       | 355                           | 37                            | 0.33                         | 0.22                        |
| 7/31/03          | 3.02                          | 33                           | 473                           | 709                           | 71                           | 1672                          | 5.31                       | 358                           | 35                            | 0.31                         | 0.22                        |
| 8/31/03          | 3.07                          | 35                           | 499                           | 753                           | 74                           | 1698                          | 5.48                       | 359                           | 36                            | 0.31                         | 0.23                        |
| 12/8/03          | 2.97                          | 31                           | 447                           | 655                           | 107                          | 1767                          | 5.40                       | 368                           | 36                            | 0.31                         | 0.23                        |
| 1/8/04           | 2.90                          | 30                           | 436                           | 646                           | 104                          | 1740                          | 5.31                       | 341                           | 36                            | 0.31                         | 0.24                        |
| 2/10/04          | 2.91                          | 31                           | 432                           | 651                           | 103                          | 1746                          | 5.33                       | 346                           | 36                            | 0.31                         | 0.23                        |

Table-36. Time series data for As and other ions in deep well at site F (depth - 58 m)

| Date of Sampling | As ( $\mu\text{moleL}^{-1}$ ) | P ( $\mu\text{moleL}^{-1}$ ) | Na ( $\mu\text{moleL}^{-1}$ ) | Mg ( $\mu\text{moleL}^{-1}$ ) | K ( $\mu\text{moleL}^{-1}$ ) | Ca ( $\mu\text{moleL}^{-1}$ ) | SMC ( $\text{meqL}^{-1}$ ) | Fe ( $\mu\text{moleL}^{-1}$ ) | Mn ( $\mu\text{moleL}^{-1}$ ) | S ( $\mu\text{moleL}^{-1}$ ) | Cl ( $\text{mmoleL}^{-1}$ ) |
|------------------|-------------------------------|------------------------------|-------------------------------|-------------------------------|------------------------------|-------------------------------|----------------------------|-------------------------------|-------------------------------|------------------------------|-----------------------------|
| 3/9/02           | 0.004                         | 6                            | 11672                         | 295                           | 35                           | 278                           | 12.85                      | 7                             | 9                             | 4                            | 8.94                        |
| 4/7/02           | 0.004                         | 5                            | 11450                         | 271                           | 36                           | 285                           | 12.60                      | 3                             | 9                             | 4                            | 7.79                        |
| 5/5/02           | 0.004                         | 5                            | 12073                         | 302                           | 35                           | 281                           | 13.27                      | 6                             | 9                             | 5                            | 9.17                        |
| 6/8/02           | 0.004                         | 5                            | 12253                         | 294                           | 38                           | 293                           | 13.46                      | 4                             | 9                             | 6                            | 9.19                        |
| 7/6/02           | 0.004                         | 5                            | 12276                         | 312                           | 35                           | 288                           | 13.51                      | 7                             | 9                             | 7                            | 9.38                        |
| 8/3/02           | 0.004                         | 5                            | 11611                         | 286                           | 35                           | 293                           | 12.80                      | 4                             | 9                             | 7                            | 9.04                        |
| 9/7/02           | 0.004                         | 5                            | 11982                         | 292                           | 35                           | 294                           | 13.19                      | 5                             | 10                            | 11                           | 9.82                        |
| 10/14/02         | 0.003                         | 5                            | 12254                         | 307                           | 36                           | 303                           | 13.51                      | 5                             | 9                             | 12                           | 10.07                       |
| 11/10/02         | 0.004                         | 4                            | 9024                          | 255                           | 32                           | 245                           | 10.06                      | 3                             | 8                             | 12                           | 10.21                       |
| 12/1/02          | 0.004                         | 4                            | 9017                          | 267                           | 33                           | 253                           | 10.09                      | 4                             | 8                             | 12                           | 10.30                       |
| 1/7/03           | 0.004                         | 5                            | 10640                         | 234                           | 32                           | 28                            | 11.20                      | 8                             | 9                             | 13                           | 10.16                       |
| 2/1/03           | 0.004                         | 5                            | 11806                         | 297                           | 37                           | 30                            | 13.04                      | 9                             | 9                             | 12                           | 10.02                       |
| 3/1/03           | 0.004                         | 5                            | 11770                         | 307                           | 35                           | 294                           | 13.01                      | 7                             | 9                             | 13                           | 9.89                        |
| 3/30/03          | 0.004                         | 5                            | 12062                         | 306                           | 34                           | 288                           | 13.28                      | 7                             | 10                            | 12                           | 9.76                        |
| 4/29/03          | 0.004                         | 5                            | 11654                         | 285                           | 35                           | 292                           | 12.84                      | 5                             | 9                             | 12                           | 9.85                        |
| 5/28/03          | 0.004                         | 5                            | 11562                         | 263                           | 33                           | 273                           | 12.67                      | 5                             | 9                             | 11                           | 9.32                        |
| 6/30/03          | 0.004                         | 5                            | 12140                         | 276                           | 35                           | 287                           | 13.30                      | 5                             | 9                             | 11                           | 9.53                        |
| 7/31/03          | 0.004                         | 5                            | 10321                         | 237                           | 34                           | 295                           | 11.42                      | 3                             | 9                             | 0.1                          | 9.24                        |
| 8/31/03          | 0.004                         | 5                            | 10452                         | 235                           | 34                           | 301                           | 11.56                      | 4                             | 9                             | 1                            | 9.75                        |
| 12/8/03          | 0.004                         | 5                            | 11459                         | 305                           | 42                           | 311                           | 12.73                      | 9                             | 9                             | 14                           | 10.66                       |
| 1/8/04           | 0.004                         | 5                            | 11371                         | 294                           | 39                           | 302                           | 12.60                      | 9                             | 8                             | 10                           | 11.48                       |
| 2/10/04          | 0.004                         | 5                            | 11062                         | 275                           | 38                           | 287                           | 12.22                      | 4                             | 8                             | 9                            | 10.69                       |

**Table-37. Time series water level data (m) for shallow and deep wells at site F**

| Date of<br>Measureme | Wells at different depths |      |      |      |     |      |
|----------------------|---------------------------|------|------|------|-----|------|
|                      | 6 m                       | 11 m | 15 m | 19 m | 26m | 58 m |
| 03/09/02             | 2.5                       | 2.5  | 2.5  | 2.5  | -   | x    |
| 03/23/02             | 2.3                       | 2.3  | 2.3  | 2.3  | -   | 2.3  |
| 04/06/02             | 2.8                       | 2.8  | 2.8  | 2.8  | -   | x    |
| 04/20/02             | 2.8                       | 2.7  | 2.7  | 2.7  | -   | 2.7  |
| 05/05/02             | 3.0                       | 3.0  | 3.0  | 3.0  | -   | x    |
| 05/18/02             | 3.8                       | 3.8  | 3.8  | 3.8  | -   | 3.8  |
| 06/01/02             | 4.3                       | 4.3  | 4.2  | 4.3  | -   | x    |
| 06/24/02             | 5.3                       | 5.3  | 5.3  | 5.2  | -   | 5.2  |
| 07/14/02             | 6.0                       | 6.0  | 6.0  | 6.0  | -   | 5.9  |
| 09/07/02             | 5.8                       | 5.8  | 5.8  | 5.8  | -   | x    |
| 10/14/02             | 5.3                       | 5.3  | 5.3  | 5.3  | -   | 5.2  |
| 11/10/02             | 4.5                       | 4.5  | 4.4  | 4.4  | 4.5 | x    |
| 12/16/02             | 4.3                       | 4.2  | 4.2  | 4.2  | 4.3 | x    |
| 01/05/03             | 3.8                       | 3.8  | 3.8  | 3.8  | 3.8 | 3.8  |
| 01/07/03             | 3.8                       | 3.8  | 3.8  | 3.8  | 3.8 | 3.7  |
| 02/01/03             | 3.0                       | 3.0  | 3.0  | 3.0  | 3.0 | 2.9  |
| 02/15/03             | 2.8                       | 2.8  | 2.8  | 2.8  | 2.8 | 2.8  |
| 03/02/03             | 2.6                       | 2.6  | 2.6  | 2.5  | 2.7 | 2.4  |
| 03/15/03             | 2.6                       | 2.6  | 2.6  | 2.6  | 2.8 | 2.4  |
| 03/31/03             | 2.7                       | 2.7  | 2.7  | 2.7  | 2.9 | 2.5  |
| 04/12/03             | 2.7                       | 2.6  | 2.6  | 2.6  | 2.8 | 2.5  |
| 04/26/03             | 2.8                       | 2.8  | 2.8  | 2.8  | 3.0 | 2.6  |
| 05/11/03             | 3.5                       | 3.5  | 3.5  | 3.5  | 3.5 | 3.5  |
| 05/24/03             | 3.6                       | 3.6  | 3.6  | 3.6  | 3.6 | 3.6  |
| 06/07/03             | 3.9                       | 3.9  | 3.9  | 3.9  | 3.9 | 3.9  |
| 06/24/03             | 5.4                       | 5.4  | 5.4  | 5.4  | 5.4 | 5.2  |
| 07/08/03             | 6.1                       | 6.1  | 6.0  | 6.0  | 6.1 | x    |
| 07/22/03             | 6.9                       | 6.7  | 6.7  | 6.7  | 6.7 | x    |
| 08/05/03             | 6.4                       | 6.3  | 6.3  | 6.3  | 6.3 | x    |
| 08/21/03             | 6.0                       | 5.9  | 5.9  | 5.9  | 5.9 | x    |
| 09/03/03             | 6.2                       | 6.2  | 6.2  | 6.2  | 6.2 | x    |
| 09/18/03             | 6.1                       | 6.1  | 6.1  | 6.1  | 6.1 | x    |
| 10/01/03             | 6.2                       | 6.2  | 6.1  | 6.2  | 6.2 | x    |
| 11/09/03             | 5.1                       | 5.0  | 5.0  | 5.0  | 5.0 | x    |
| 11/23/03             | 4.6                       | 4.6  | 4.6  | 4.6  | 4.6 | 4.6  |
| 12/10/03             | 4.3                       | 4.4  | 4.3  | 4.3  | 4.3 | x    |
| 12/25/03             | 4.1                       | 4.1  | 4.1  | 4.1  | 4.1 | x    |
| 01/11/04             | 3.9                       | 3.9  | 3.9  | 3.9  | 3.9 | x    |
| 01/25/04             | 3.7                       | 3.6  | 3.6  | 3.6  | 3.6 | x    |
| 02/16/04             | 2.8                       | 2.8  | 2.8  | 2.8  | 2.8 | x    |
| 02/27/04             | 2.7                       | 2.7  | 2.7  | 2.7  | 2.7 | x    |

- Well was not installed    x Wells were not accessible due to public use

Table-38. Time series data for As and other ions in shallow well at site G (depth - 6 m)

| Date of Sampling | As ( $\mu\text{moleL}^{-1}$ ) | P ( $\mu\text{moleL}^{-1}$ ) | Na ( $\mu\text{moleL}^{-1}$ ) | Mg ( $\mu\text{moleL}^{-1}$ ) | K ( $\mu\text{moleL}^{-1}$ ) | Ca ( $\mu\text{moleL}^{-1}$ ) | SMC (meqL <sup>-1</sup> ) | Fe ( $\mu\text{moleL}^{-1}$ ) | Mn ( $\mu\text{moleL}^{-1}$ ) | S ( $\mu\text{moleL}^{-1}$ ) | Cl (mmoleL <sup>-1</sup> ) |
|------------------|-------------------------------|------------------------------|-------------------------------|-------------------------------|------------------------------|-------------------------------|---------------------------|-------------------------------|-------------------------------|------------------------------|----------------------------|
| 4/7/02           | 1.53                          | 66                           | 405                           | 952                           | 115                          | 1300                          | 5.02                      | 1049                          | 29                            | 24                           | 0.11                       |
| 5/5/02           | 1.67                          | 60                           | 358                           | 700                           | 69                           | 1242                          | 4.31                      | 487                           | 25                            | 22                           | 0.11                       |
| 6/8/02           | 1.89                          | 62                           | 364                           | 726                           | 69                           | 1247                          | 4.38                      | 523                           | 26                            | 22                           | 0.11                       |
| 7/6/02           | 1.69                          | 47                           | 377                           | 728                           | 67                           | 1245                          | 4.39                      | 655                           | 30                            | 21                           | 0.12                       |
| 8/3/02           | 1.20                          | 27                           | 363                           | 715                           | 70                           | 1272                          | 4.41                      | 999                           | 34                            | 24                           | 0.13                       |
| 9/7/02           | 1.13                          | 17                           | 374                           | 721                           | 67                           | 1304                          | 4.49                      | 1022                          | 31                            | 24                           | 0.12                       |
| 10/14/02         | 1.76                          | 55                           | 359                           | 703                           | 74                           | 1335                          | 4.51                      | 750                           | 25                            | 23                           | 0.12                       |
| 11/10/02         | 1.84                          | 66                           | 361                           | 682                           | 71                           | 1296                          | 4.39                      | 552                           | 21                            | 22                           | 0.12                       |
| 12/1/02          | 1.76                          | 65                           | 361                           | 664                           | 71                           | 1261                          | 4.28                      | 498                           | 22                            | 22                           | 0.12                       |
| 1/8/03           | 1.68                          | 59                           | 336                           | 689                           | 91                           | 1365                          | 4.54                      | 515                           | 23                            | 20                           | -                          |
| 3/1/03           | 1.72                          | 62                           | 356                           | 722                           | 69                           | 1271                          | 4.41                      | 478                           | 23                            | 21                           | -                          |
| 3/30/03          | 1.57                          | 53                           | 366                           | 736                           | 66                           | 1210                          | 4.32                      | 450                           | 23                            | 21                           | 0.11                       |
| 4/29/03          | 1.70                          | 60                           | 369                           | 765                           | 67                           | 1252                          | 4.47                      | 491                           | 23                            | 21                           | 0.11                       |
| 5/28/03          | 1.73                          | 59                           | 359                           | 748                           | 65                           | 1231                          | 4.38                      | 491                           | 22                            | 21                           | 0.11                       |
| 6/30/03          | 1.77                          | 55                           | 372                           | 770                           | 67                           | 1269                          | 4.52                      | 532                           | 23                            | 21                           | -                          |
| 7/31/03          | 1.81                          | 64                           | 368                           | 780                           | 73                           | 1351                          | 4.70                      | 520                           | 23                            | 21                           | 0.11                       |
| 8/31/03          | 1.87                          | 65                           | 369                           | 801                           | 75                           | 1406                          | 4.86                      | 543                           | 24                            | 21                           | 0.11                       |
| 12/8/03          | 1.92                          | 69                           | 369                           | 800                           | 73                           | 1442                          | 4.93                      | 564                           | 22                            | 22                           | 0.14                       |
| 1/8/04           | 1.85                          | 72                           | 397                           | 758                           | 76                           | 1414                          | 4.82                      | 513                           | 18                            | 22                           | 0.14                       |
| 2/10/04          | 1.88                          | 60                           | 380                           | 861                           | 75                           | 1430                          | 5.04                      | 573                           | 25                            | 21                           | 0.12                       |

Table-39. Time series data for As and other ions in shallow well at site G (depth - 9 m)

| Date of Sampling | As ( $\mu\text{moleL}^{-1}$ ) | P ( $\mu\text{moleL}^{-1}$ ) | Na ( $\mu\text{moleL}^{-1}$ ) | Mg ( $\mu\text{moleL}^{-1}$ ) | K ( $\mu\text{moleL}^{-1}$ ) | Ca ( $\mu\text{moleL}^{-1}$ ) | SMC (meqL <sup>-1</sup> ) | Fe ( $\mu\text{moleL}^{-1}$ ) | Mn ( $\mu\text{moleL}^{-1}$ ) | S ( $\mu\text{moleL}^{-1}$ ) | Cl (mmoleL <sup>-1</sup> ) |
|------------------|-------------------------------|------------------------------|-------------------------------|-------------------------------|------------------------------|-------------------------------|---------------------------|-------------------------------|-------------------------------|------------------------------|----------------------------|
| 4/7/02           | 2.36                          | 150                          | 384                           | 740                           | 96                           | 1683                          | 5.33                      | 483                           | 6                             | 9                            | 0.10                       |
| 5/5/02           | 2.31                          | 135                          | 384                           | 744                           | 97                           | 1697                          | 5.36                      | 447                           | 6                             | 14                           | 0.10                       |
| 6/8/02           | 2.33                          | 138                          | 364                           | 735                           | 93                           | 1753                          | 5.43                      | 523                           | 7                             | 5                            | 0.09                       |
| 7/6/02           | 1.98                          | 86                           | 360                           | 681                           | 87                           | 1394                          | 4.60                      | 460                           | 10                            | 6                            | 0.11                       |
| 8/3/02           | 2.21                          | 105                          | 361                           | 692                           | 92                           | 1560                          | 4.96                      | 551                           | 12                            | 14                           | 0.11                       |
| 9/7/02           | 1.79                          | 65                           | 404                           | 746                           | 87                           | 1712                          | 5.41                      | 616                           | 15                            | <0.03                        | 0.12                       |
| 10/14/02         | 1.79                          | 69                           | 380                           | 727                           | 91                           | 1770                          | 5.46                      | 649                           | 9                             | <0.03                        | 0.12                       |
| 11/10/02         | 1.90                          | 90                           | 373                           | 727                           | 90                           | 1730                          | 5.38                      | 587                           | 9                             | 9                            | 0.11                       |
| 12/1/02          | 2.04                          | 146                          | 365                           | 705                           | 92                           | 1682                          | 5.23                      | 578                           | 10                            | 7                            | 0.10                       |
| 1/8/03           | 1.95                          | 84                           | 347                           | 629                           | 90                           | 1473                          | 4.64                      | 400                           | 9                             | 2                            | -                          |
| 3/1/03           | 2.07                          | 104                          | 332                           | 630                           | 102                          | 1692                          | 5.08                      | 449                           | 7                             | 3                            | -                          |
| 3/30/03          | 2.09                          | 109                          | 352                           | 683                           | 90                           | 1615                          | 5.04                      | 424                           | 7                             | 2                            | 0.09                       |
| 4/29/03          | 2.18                          | 116                          | 352                           | 703                           | 92                           | 1697                          | 5.24                      | 446                           | 6                             | 3                            | 0.10                       |
| 5/28/03          | 2.18                          | 109                          | 364                           | 732                           | 90                           | 1625                          | 5.17                      | 478                           | 8                             | 3                            | -                          |
| 6/30/03          | 2.10                          | 108                          | 350                           | 712                           | 86                           | 1628                          | 5.12                      | 465                           | 8                             | 3                            | -                          |
| 7/31/03          | 2.25                          | 111                          | 348                           | 693                           | 92                           | 1640                          | 5.11                      | 459                           | 8                             | 3                            | 0.11                       |
| 8/31/03          | 2.11                          | 110                          | 354                           | 726                           | 95                           | 1649                          | 5.20                      | 481                           | 7                             | 7                            | 0.12                       |
| 12/8/03          | 2.03                          | 98                           | 336                           | 680                           | 93                           | 1694                          | 5.18                      | 537                           | 7                             | 4                            | 0.10                       |
| 1/8/04           | 2.26                          | 119                          | 367                           | 772                           | 95                           | 1786                          | 5.58                      | 489                           | 7                             | 5                            | 0.11                       |
| 2/10/04          | 2.42                          | 117                          | 407                           | 822                           | 97                           | 1856                          | 5.86                      | 492                           | 7                             | 3                            | 0.11                       |

Table-40. Time series data for As and other ions in shallow well at site G (depth - 14 m)

| Date of Sampling | As ( $\mu\text{moleL}^{-1}$ ) | P ( $\mu\text{moleL}^{-1}$ ) | Na ( $\mu\text{moleL}^{-1}$ ) | Mg ( $\mu\text{moleL}^{-1}$ ) | K ( $\mu\text{moleL}^{-1}$ ) | Ca ( $\mu\text{moleL}^{-1}$ ) | SMC (meqL <sup>-1</sup> ) | Fe ( $\mu\text{moleL}^{-1}$ ) | Mn ( $\mu\text{moleL}^{-1}$ ) | S ( $\mu\text{moleL}^{-1}$ ) | Cl (mmoleL <sup>-1</sup> ) |
|------------------|-------------------------------|------------------------------|-------------------------------|-------------------------------|------------------------------|-------------------------------|---------------------------|-------------------------------|-------------------------------|------------------------------|----------------------------|
| 4/7/02           | 1.39                          | 36                           | 424                           | 706                           | 82                           | 1490                          | 4.90                      | 356                           | 39                            | 2.6                          | 0.18                       |
| 5/5/02           | 1.30                          | 36                           | 365                           | 586                           | 76                           | 1225                          | 4.06                      | 293                           | 33                            | 1.8                          | 0.16                       |
| 6/8/02           | 1.25                          | 33                           | 335                           | 491                           | 70                           | 1033                          | 3.45                      | 229                           | 26                            | 1.0                          | 0.17                       |
| 7/6/02           | 1.44                          | 40                           | 342                           | 530                           | 73                           | 1203                          | 3.88                      | 327                           | 30                            | 1.0                          | 0.17                       |
| 8/3/02           | 1.44                          | 40                           | 344                           | 564                           | 72                           | 1263                          | 4.07                      | 304                           | 30                            | 1.4                          | 0.19                       |
| 9/7/02           | 1.33                          | 38                           | 353                           | 564                           | 72                           | 1243                          | 4.04                      | 438                           | 29                            | 1.0                          | 0.20                       |
| 10/14/02         | 1.42                          | 38                           | 345                           | 551                           | 74                           | 1267                          | 4.05                      | 313                           | 29                            | 1.4                          | 0.21                       |
| 11/10/02         | 1.38                          | 39                           | 349                           | 552                           | 73                           | 1280                          | 4.09                      | 291                           | 29                            | 1.4                          | 0.22                       |
| 12/1/02          | 1.36                          | 37                           | 593                           | 936                           | 72                           | 659                           | 3.86                      | 334                           | 29                            | 1.0                          | 0.20                       |
| 1/8/03           | 1.42                          | 36                           | 340                           | 554                           | 72                           | 1259                          | 4.04                      | 357                           | 29                            | 1.0                          | 0.19                       |
| 3/1/03           | 1.22                          | 31                           | 287                           | 449                           | 68                           | 1167                          | 3.59                      | 246                           | 29                            | 1.4                          | 0.18                       |
| 3/30/03          | 1.30                          | 34                           | 328                           | 506                           | 70                           | 1047                          | 3.50                      | 248                           | 26                            | 1.0                          | 0.18                       |
| 4/29/03          | 1.29                          | 36                           | 358                           | 517                           | 81                           | 1087                          | 3.65                      | 248                           | 27                            | 1.0                          | 0.16                       |
| 5/28/03          | 1.36                          | 33                           | 270                           | 507                           | 75                           | 1301                          | 3.96                      | 290                           | 32                            | 1.0                          | 0.20                       |
| 6/30/03          | 1.36                          | 34                           | 350                           | 568                           | 76                           | 1320                          | 4.20                      | 293                           | 31                            | 1.0                          | -                          |
| 7/31/03          | 1.38                          | 33                           | 337                           | 563                           | 76                           | 1309                          | 4.16                      | 276                           | 30                            | 1.0                          | 0.21                       |
| 8/31/03          | 1.39                          | 33                           | 342                           | 552                           | 75                           | 1277                          | 4.08                      | 259                           | 29                            | 1.0                          | 0.22                       |
| 12/8/03          | 1.29                          | 33                           | 341                           | 548                           | 71                           | 1197                          | 3.90                      | 248                           | 28                            | 1.0                          | 0.21                       |
| 1/8/04           | 1.41                          | 33                           | 338                           | 565                           | 74                           | 1269                          | 4.08                      | 271                           | 31                            | 1.0                          | 0.22                       |
| 2/10/04          | 1.36                          | 32                           | 337                           | 539                           | 73                           | 1230                          | 3.95                      | 256                           | 29                            | 1.4                          | 0.17                       |

Table-41. Time series data for As and other ions in shallow well at site G (depth - 21 m)

| Date of Sampling | As ( $\mu\text{moleL}^{-1}$ ) | P ( $\mu\text{moleL}^{-1}$ ) | Na ( $\mu\text{moleL}^{-1}$ ) | Mg ( $\mu\text{moleL}^{-1}$ ) | K ( $\mu\text{moleL}^{-1}$ ) | Ca ( $\mu\text{moleL}^{-1}$ ) | SMC ( $\text{meqL}^{-1}$ ) | Fe ( $\mu\text{moleL}^{-1}$ ) | Mn ( $\mu\text{moleL}^{-1}$ ) | S ( $\mu\text{moleL}^{-1}$ ) | Cl ( $\text{mmoleL}^{-1}$ ) |
|------------------|-------------------------------|------------------------------|-------------------------------|-------------------------------|------------------------------|-------------------------------|----------------------------|-------------------------------|-------------------------------|------------------------------|-----------------------------|
| 4/7/02           | 2.30                          | 43                           | 330                           | 490                           | 80                           | 1122                          | 3.63                       | 195                           | 23                            | 7.0                          | 0.45                        |
| 5/5/02           | 2.32                          | 45                           | 372                           | 565                           | 98                           | 1197                          | 3.99                       | 369                           | 27                            | 6.4                          | 0.46                        |
| 6/8/02           | 1.91                          | 41                           | 332                           | 476                           | 75                           | 1172                          | 3.70                       | 151                           | 25                            | 5.9                          | 0.45                        |
| 7/6/02           | 2.21                          | 44                           | 365                           | 525                           | 79                           | 1288                          | 4.07                       | 148                           | 26                            | 1.9                          | 0.51                        |
| 8/3/02           | 2.65                          | 51                           | 352                           | 518                           | 78                           | 1314                          | 4.09                       | 189                           | 28                            | 0.9                          | 0.53                        |
| 9/7/02           | 2.75                          | 47                           | 354                           | 522                           | 78                           | 1288                          | 4.05                       | 222                           | 28                            | 2.3                          | 0.53                        |
| 10/14/02         | 2.68                          | 51                           | 370                           | 526                           | 79                           | 1337                          | 4.18                       | 202                           | 29                            | 1.0                          | 0.55                        |
| 11/10/02         | 2.36                          | 44                           | 373                           | 525                           | 81                           | 1324                          | 4.15                       | 179                           | 27                            | 0.9                          | 0.58                        |
| 12/1/02          | 2.21                          | 44                           | 433                           | 566                           | 87                           | 1314                          | 4.28                       | 190                           | 28                            | 3.2                          | 0.57                        |
| 1/8/03           | 2.31                          | 37                           | 398                           | 545                           | 79                           | 1287                          | 4.14                       | 192                           | 30                            | 1.0                          | 0.57                        |
| 3/1/03           | 2.23                          | 43                           | 390                           | 472                           | 97                           | 1313                          | 4.06                       | 200                           | 29                            | 1.0                          | 0.58                        |
| 3/30/03          | 2.26                          | 41                           | 346                           | 480                           | 79                           | 1225                          | 3.84                       | 164                           | 25                            | 5.6                          | 0.55                        |
| 4/29/03          | 2.16                          | 39                           | 345                           | 475                           | 78                           | 1205                          | 3.78                       | 149                           | 26                            | 4.8                          | 0.56                        |
| 5/28/03          | 2.19                          | 39                           | 383                           | 527                           | 78                           | 1313                          | 4.14                       | 156                           | 27                            | 1.6                          | 0.56                        |
| 6/30/03          | 2.16                          | 38                           | 439                           | 592                           | 80                           | 1413                          | 4.53                       | 183                           | 31                            | 1.1                          | -                           |
| 7/31/03          | 2.32                          | 39                           | 501                           | 585                           | 84                           | 1447                          | 4.65                       | 195                           | 31                            | 0.8                          | 0.56                        |
| 8/31/03          | 2.29                          | 40                           | 521                           | 572                           | 87                           | 1415                          | 4.58                       | 205                           | 30                            | 1.0                          | 0.57                        |
| 12/8/03          | 2.28                          | 39                           | 562                           | 588                           | 86                           | 1406                          | 4.63                       | 201                           | 32                            | 0.7                          | 0.57                        |
| 1/8/04           | 2.38                          | 45                           | 561                           | 589                           | 82                           | 1422                          | 4.67                       | 213                           | 31                            | 0.8                          | 0.68                        |
| 2/10/04          | 2.15                          | 37                           | 620                           | 591                           | 85                           | 1406                          | 4.70                       | 183                           | 29                            | 0.7                          | 0.66                        |

Table-42. Time series data for As and other ions in deep well at site G (depth - 52 m)

| Date of Sampling | As ( $\mu\text{moleL}^{-1}$ ) | P ( $\mu\text{moleL}^{-1}$ ) | Na ( $\mu\text{moleL}^{-1}$ ) | Mg ( $\mu\text{moleL}^{-1}$ ) | K ( $\mu\text{moleL}^{-1}$ ) | Ca ( $\mu\text{moleL}^{-1}$ ) | SMC ( $\text{meqL}^{-1}$ ) | Fe ( $\mu\text{moleL}^{-1}$ ) | Mn ( $\mu\text{moleL}^{-1}$ ) | S ( $\mu\text{moleL}^{-1}$ ) | Cl ( $\text{mmoleL}^{-1}$ ) |
|------------------|-------------------------------|------------------------------|-------------------------------|-------------------------------|------------------------------|-------------------------------|----------------------------|-------------------------------|-------------------------------|------------------------------|-----------------------------|
| 3/9/02           | 6.473                         | 8                            | 11279                         | 230                           | 42                           | 282                           | 12.34                      | 17                            | 14                            | 34                           | 6.84                        |
| 4/7/02           | 6.270                         | 8                            | 10772                         | 223                           | 61                           | 279                           | 11.84                      | 14                            | 13                            | 32                           | 6.19                        |
| 5/5/02           | 6.284                         | 7                            | 10704                         | 214                           | 41                           | 278                           | 11.73                      | 8                             | 13                            | 34                           | 5.98                        |
| 6/8/02           | 7.369                         | 8                            | 10130                         | 208                           | 40                           | 275                           | 11.14                      | 9                             | 12                            | 35                           | 6.68                        |
| 7/6/02           | 6.152                         | 8                            | 10020                         | 202                           | 40                           | 282                           | 11.03                      | 12                            | 11                            | 32                           | 6.81                        |
| 8/3/02           | 6.751                         | 6                            | 9848                          | 201                           | 36                           | 263                           | 10.81                      | 10                            | 12                            | 33                           | 7.04                        |
| 9/7/02           | 6.426                         | 7                            | 10093                         | 213                           | 39                           | 273                           | 11.10                      | 9                             | 12                            | 29                           | 6.47                        |
| 10/14/02         | 7.294                         | 6                            | 10303                         | 214                           | 40                           | 266                           | 11.30                      | 10                            | 12                            | 32                           | 7.72                        |
| 11/10/02         | 5.919                         | 7                            | 9772                          | 200                           | 40                           | 267                           | 10.75                      | 9                             | 11                            | 30                           | 7.85                        |
| 12/1/02          | 8.405                         | 7                            | 9619                          | 196                           | 38                           | 248                           | 10.54                      | 18                            | 11                            | 30                           | 6.72                        |
| 1/8/03           | 5.980                         | 9                            | 9998                          | 197                           | 45                           | 298                           | 11.03                      | 11                            | 12                            | 30                           | 7.49                        |
| 3/1/03           | 7.523                         | 6                            | 9686                          | 205                           | 38                           | 256                           | 10.65                      | 35                            | 12                            | 30                           | 7.65                        |
| 3/30/03          | 6.875                         | 6                            | 9083                          | 193                           | 36                           | 247                           | 10.00                      | 36                            | 12                            | 32                           | 7.14                        |
| 4/29/03          | 6.454                         | 6                            | 9315                          | 191                           | 36                           | 234                           | 10.20                      | 15                            | 11                            | 31                           | 7.43                        |
| 5/28/03          | 6.233                         | 6                            | 9457                          | 202                           | 37                           | 263                           | 10.42                      | 9                             | 11                            | 30                           | 7.48                        |
| 6/30/03          | 6.440                         | 6                            | 9695                          | 199                           | 35                           | 243                           | 10.61                      | 8                             | 11                            | 30                           | -                           |
| 7/31/03          | 6.714                         | 7                            | 10071                         | 214                           | 38                           | 259                           | 11.06                      | 8                             | 11                            | 29                           | 7.78                        |
| 8/31/03          | 6.482                         | 6                            | 9622                          | 204                           | 36                           | 239                           | 10.54                      | 7                             | 11                            | 28                           | 7.69                        |
| 12/8/03          | 7.073                         | 7                            | 9291                          | 201                           | 39                           | 259                           | 10.25                      | 12                            | 11                            | 25                           | 7.87                        |
| 1/8/04           | 6.157                         | 7                            | 9364                          | 198                           | 36                           | 259                           | 10.31                      | 8                             | 11                            | 27                           | 7.83                        |
| 2/10/04          | 6.464                         | 6                            | 9246                          | 194                           | 36                           | 252                           | 10.17                      | 15                            | 12                            | 28                           | 7.72                        |

Table-43. Time series water level data (m) for shallow and deep wells at site G

| Date of Measurement | Wells at different depths |     |      |      |      |
|---------------------|---------------------------|-----|------|------|------|
|                     | 6 m                       | 9 m | 14 m | 21 m | 52 m |
| 3/9/2002            | 3.1                       | 3.0 | 2.9  | 2.9  | x    |
| 3/23/2002           | 2.9                       | 2.9 | 2.9  | 2.8  | 2.5  |
| 4/6/2002            | 3.4                       | 3.3 | 3.3  | 3.2  | x    |
| 4/20/2002           | 3.3                       | 3.2 | 3.2  | 3.9  | 2.9  |
| 5/5/2002            | 3.9                       | 3.9 | 3.9  | 3.8  | x    |
| 5/18/2002           | 4.6                       | 4.5 | 4.5  | 4.4  | 4.1  |
| 6/1/2002            | 5.1                       | 5.0 | 5.0  | 4.9  | x    |
| 6/24/2002           | 6.0                       | 6.0 | 5.9  | 5.7  | 4.3  |
| 7/14/2002           | 6.7                       | 6.7 | 6.6  | 6.6  | 6.2  |
| 9/7/2002            | 6.6                       | 6.5 | 6.5  | 6.4  | x    |
| 10/14/2002          | 5.8                       | 5.2 | 5.9  | 5.8  | 5.4  |
| 11/10/2002          | 5.1                       | 5.1 | 5.0  | 4.9  | x    |
| 12/16/2002          | 4.8                       | 4.8 | 4.7  | 4.6  | x    |
| 1/8/2003            | 4.4                       | 4.3 | 4.3  | 4.2  | 4.0  |
| 1/9/2003            | 4.4                       | 4.3 | 4.3  | 4.2  | 3.9  |
| 2/1/2003            | 3.5                       | 3.4 | 3.4  | 3.3  | 3.0  |
| 2/15/2003           | 3.5                       | 3.5 | 3.4  | 3.4  | 2.9  |
| 3/2/2003            | 3.3                       | 3.2 | 3.2  | 3.1  | 2.6  |
| 3/15/2003           | 3.4                       | 3.3 | 3.3  | 3.2  | 2.7  |
| 3/31/2003           | 3.6                       | 3.5 | 3.5  | 3.4  | 2.9  |
| 4/12/2003           | 3.3                       | 3.2 | 3.2  | 3.1  | 2.7  |
| 4/26/2003           | 3.7                       | 3.7 | 3.6  | 3.5  | 3.1  |
| 5/11/2003           | 4.4                       | 4.4 | 4.3  | 4.2  | 3.8  |
| 5/24/2003           | 4.4                       | 4.3 | 4.3  | 4.2  | 3.8  |
| 6/7/2003            | 4.7                       | 4.7 | 4.6  | 4.5  | 4.1  |
| 6/24/2003           | 6.0                       | 6.0 | 5.9  | 5.8  | 5.4  |
| 7/8/2003            | 6.7                       | 6.7 | 6.6  | 6.6  | 6.1  |
| 7/22/2003           | 7.5                       | 7.4 | 7.4  | 7.3  | 6.8  |
| 8/5/2003            | 7.1                       | 7.0 | 7.0  | 6.9  | 6.5  |
| 8/21/2003           | 6.7                       | 6.6 | 6.6  | 6.5  | 6.1  |
| 9/3/2003            | 6.9                       | 6.8 | 6.8  | 6.7  | 6.4  |
| 9/18/2003           | 6.8                       | 6.8 | 6.7  | 6.7  | 6.3  |
| 10/1/2003           | 6.9                       | 6.8 | 6.8  | 6.7  | x    |
| 11/9/2003           | 5.7                       | 5.7 | 5.6  | 5.6  | 5.2  |
| 11/23/2003          | 5.2                       | 5.2 | 5.1  | 5.1  | x    |
| 12/10/2003          | 4.8                       | 4.8 | 4.7  | 4.7  | 4.4  |
| 12/25/2003          | 4.7                       | 4.6 | 4.6  | 4.5  | x    |
| 1/11/2004           | 4.5                       | 4.4 | 4.4  | 4.3  | 4.0  |
| 1/25/2004           | 3.1                       | 3.0 | 3.0  | 2.9  | x    |
| 2/16/2004           | 3.4                       | 3.3 | 3.3  | 3.2  | x    |
| 2/27/2004           | 3.1                       | 3.1 | 3.0  | 2.9  | x    |

x Well was not accessible due to public use

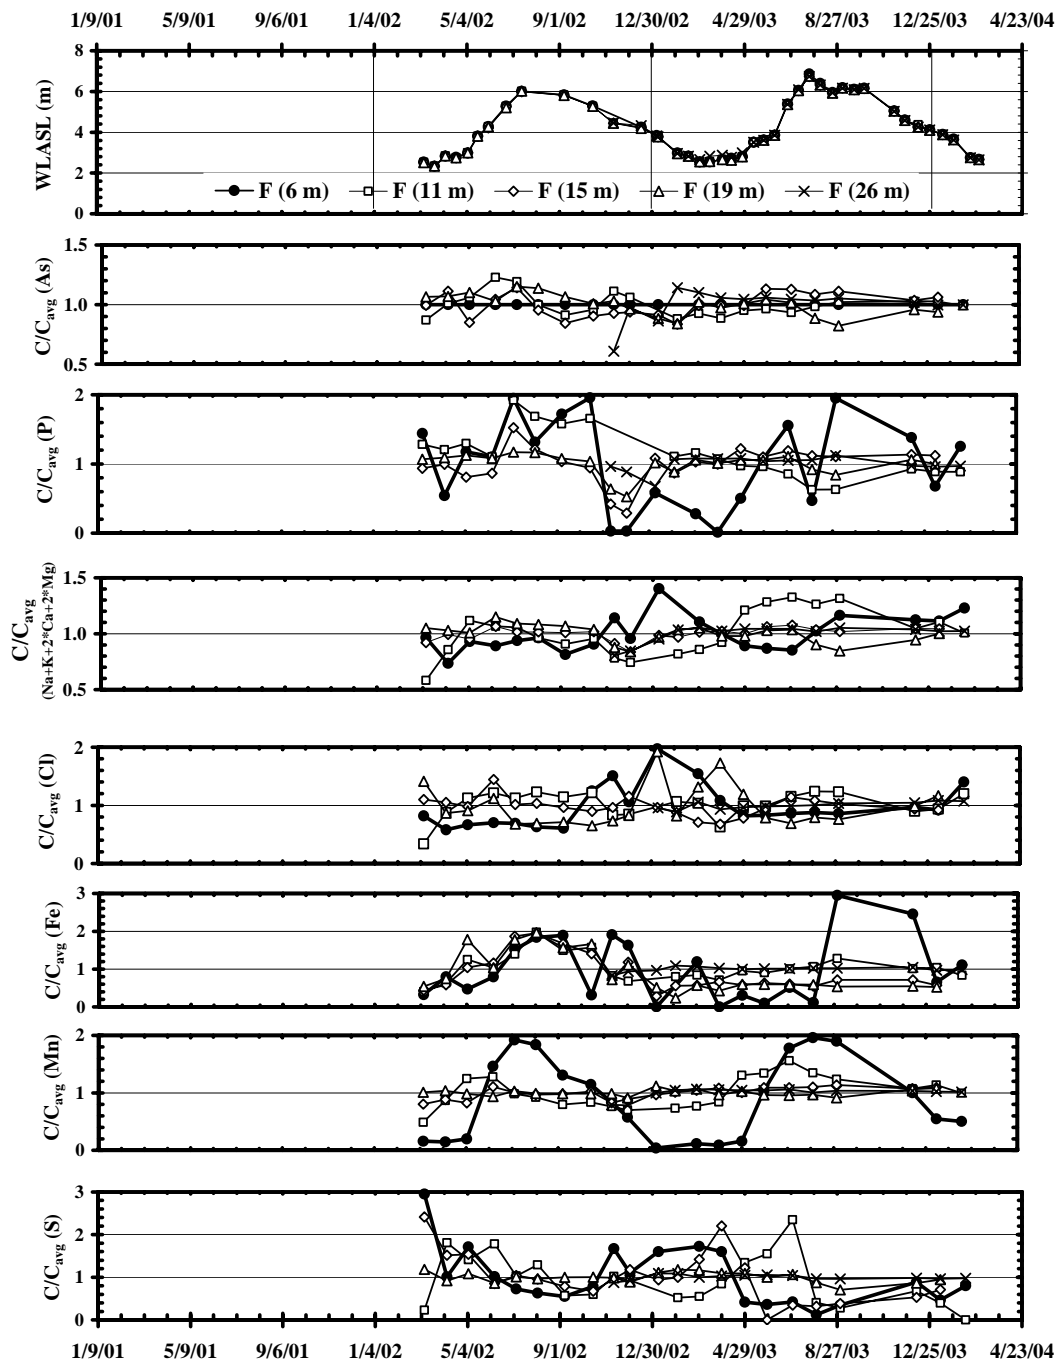

**Figure 1** Temporal variation in As and other ions concentrations in shallow aquifers of site A. The average concentration of dissolved ions including As from shallowest to deepest depths are summarized here: As (80, 132, 538, 359  $\mu\text{g/L}$ ), P (20, 16, 31, 27  $\mu\text{mole/L}$ ), SMC (5.6, 4.2, 5.4, 7 meq/L), Cl (1.3, 0.8, 1.2, 1.0 meq/L), S (374, 145, 16, 6  $\mu\text{mole/L}$ ), Fe (413, 158, 265, 332  $\mu\text{mole/L}$ ), Mn (47, 51, 96, 18  $\mu\text{mole/L}$ ). The uppermost panel shows the water table fluctuation as water level above sea level (WLASL) with time.



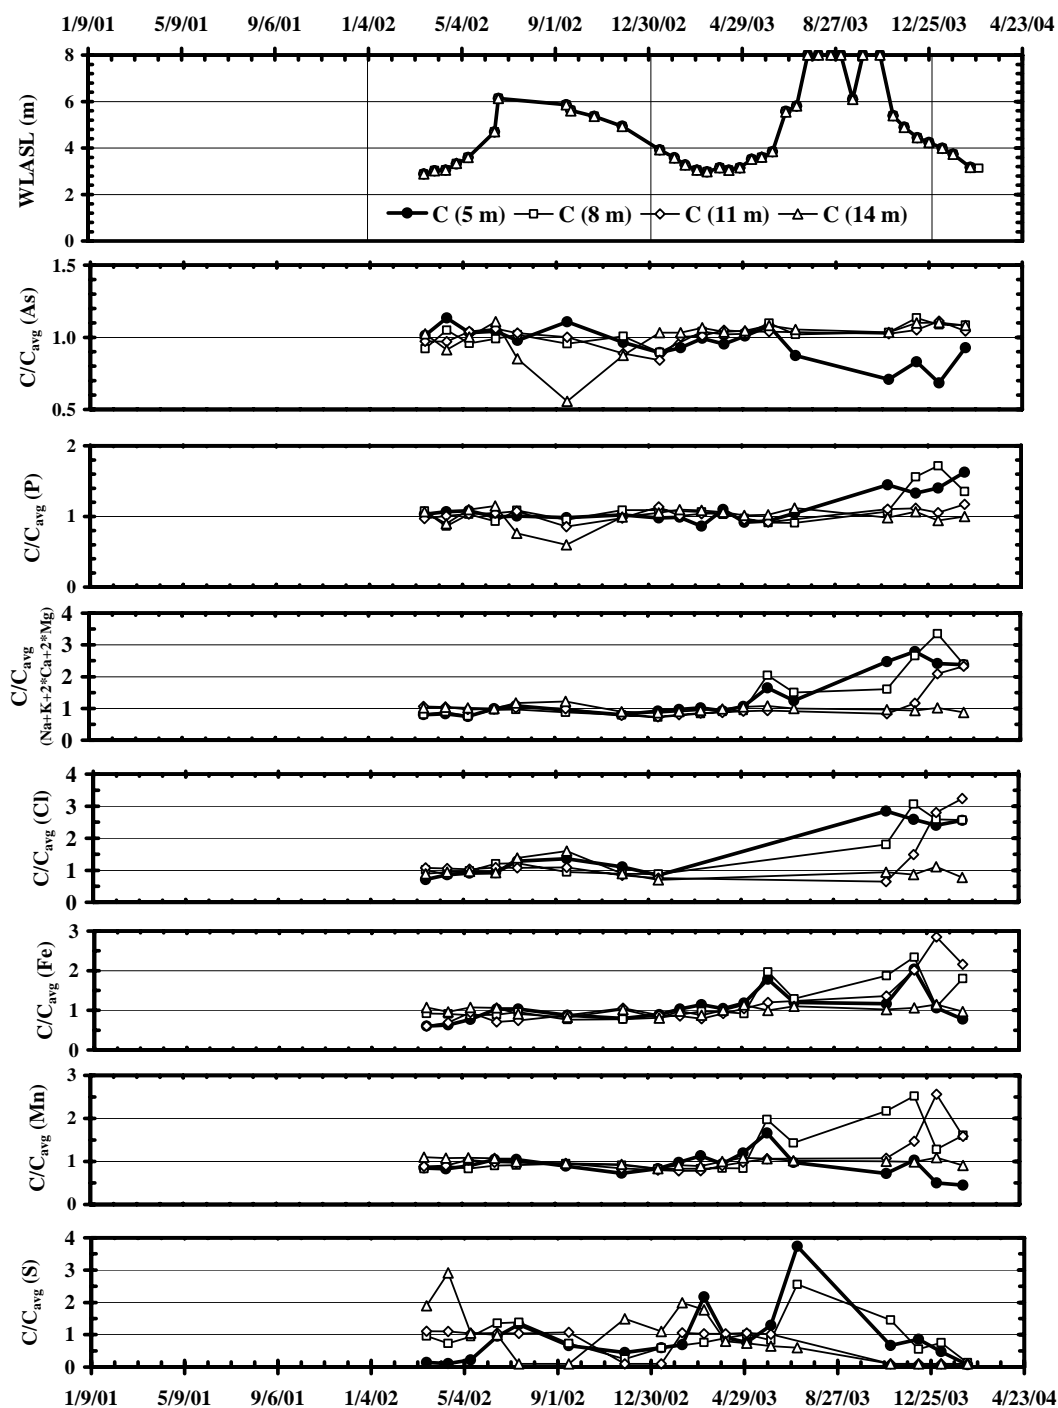

**Figure 2** Temporal variation in As and other ions concentrations in shallow aquifers of site B. The average concentration of dissolved ions including As from shallowest to deepest depths are summarized here: As (29, 299, 536, 403, 225  $\mu\text{g/L}$ ), P (56, 56, 54, 56, 53  $\mu\text{mole/L}$ ), SMC (13.9, 11.9, 9.5, 8.2, 8.2 meq/L), Cl (4.3, 3.5, 4.1, 2.1, 2.5 meq/L), S (684, 350, 161, 9, 3  $\mu\text{mole/L}$ ), Fe (445, 431, 380, 417, 363  $\mu\text{mole/L}$ ), Mn ( 18, 40, 20, 24, 6  $\mu\text{mole/L}$ ). The uppermost panel shows the water table fluctuation as water level above sea level (WLASL) with time.

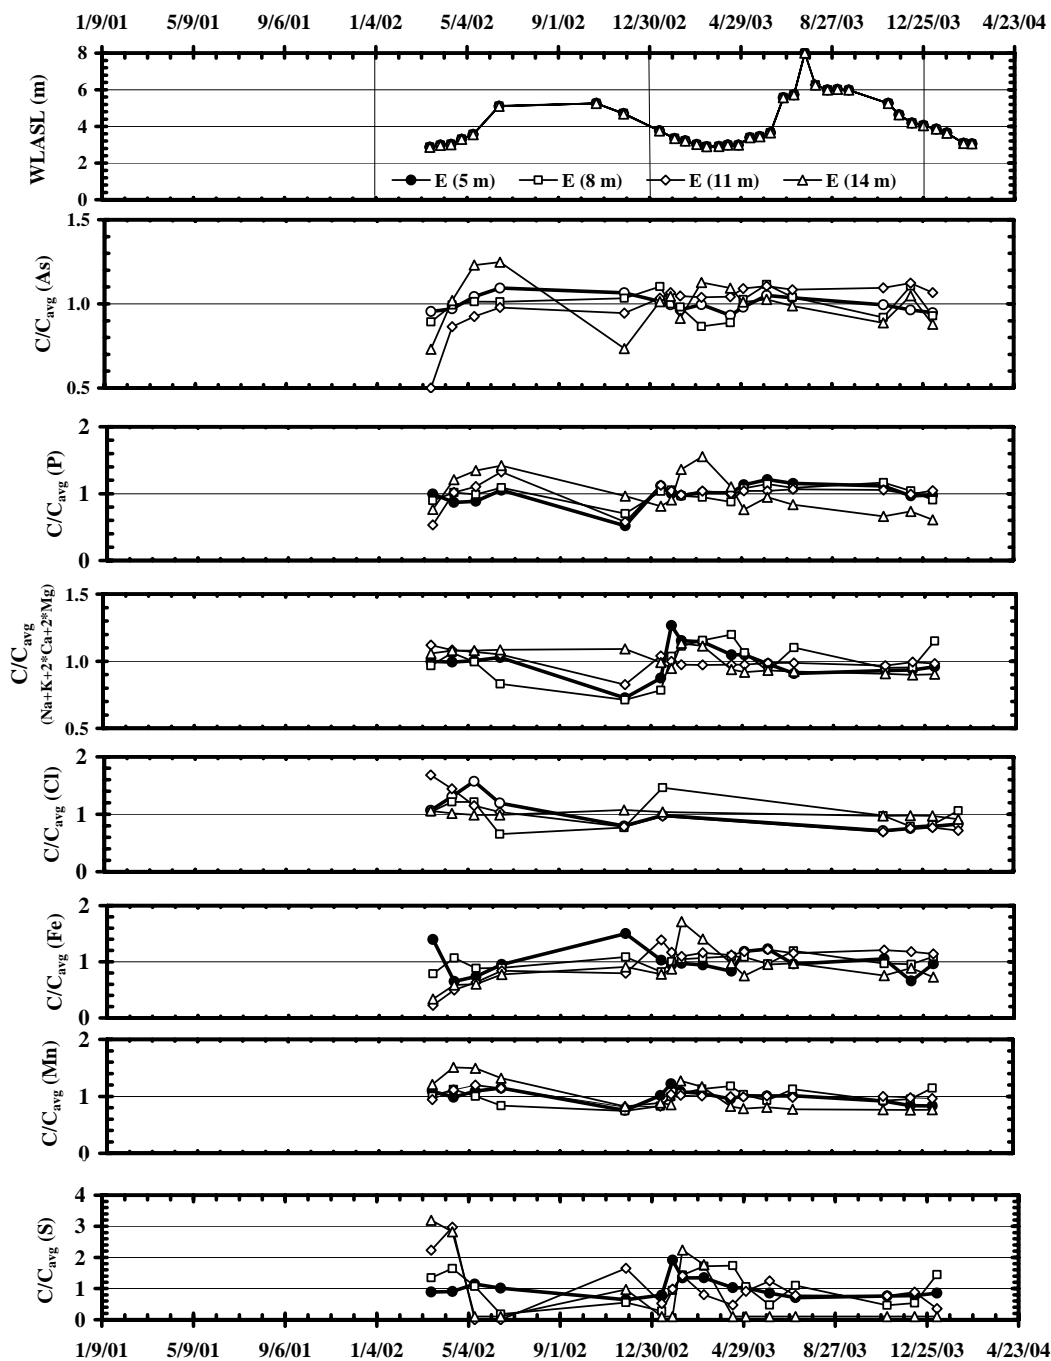

**Figure 3** Temporal variation in As and other ions concentrations in shallow aquifers of site C. Wells were installed in March 2002. The average concentration of dissolved ions including As from shallowest to deepest depths are summarized here: As (13, 37, 42, 71  $\mu\text{g/L}$ ), P (31, 22, 22, 29  $\mu\text{mole/L}$ ), SMC (2.7, 1.3, 1.3, 2.8 meq/L), Cl (0.6, 0.7, 0.5, 0.3 meq/L), S (35, 28, 15, 2  $\mu\text{mole/L}$ ), Fe (773, 1433, 1132, 601  $\mu\text{mole/L}$ ), Mn (26, 52, 31, 33  $\mu\text{mole/L}$ ). The uppermost panel shows the water table fluctuation as water level above sea level (WLASL) with time.

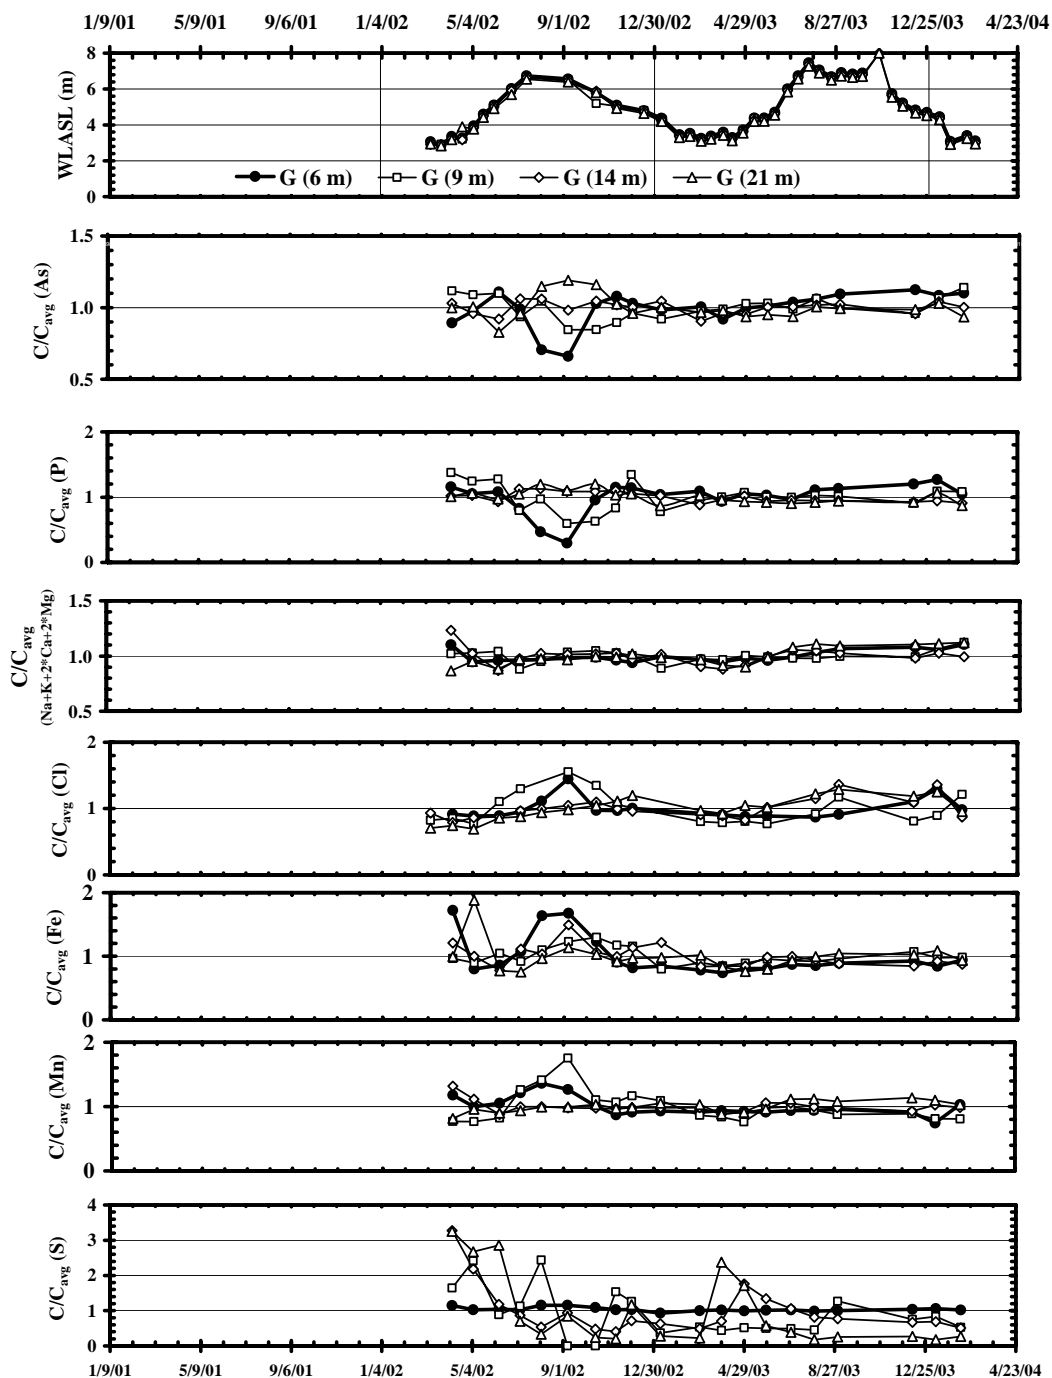

**Figure 4** Temporal variation in As and other ions concentrations in shallow aquifers of site E. Wells were installed in March 2002. The average concentration of dissolved ions including As from shallowest to deepest depths are summarized here: As (43, 82, 166, 153  $\mu\text{g/L}$ ), P (8, 26, 27, 29  $\mu\text{mole/L}$ ), SMC (4.9, 3.8, 4.2, 5.1 meq/L), Cl (0.2, 0.1, 0.1, 0.8 meq/L), S (232, 80, 15, 2  $\mu\text{mole/L}$ ), Fe (48, 424, 392, 608  $\mu\text{mole/L}$ ), Mn (17, 35, 33, 17  $\mu\text{mole/L}$ ). The uppermost panel shows the water table fluctuation as water level above sea level (WLASL) with time.

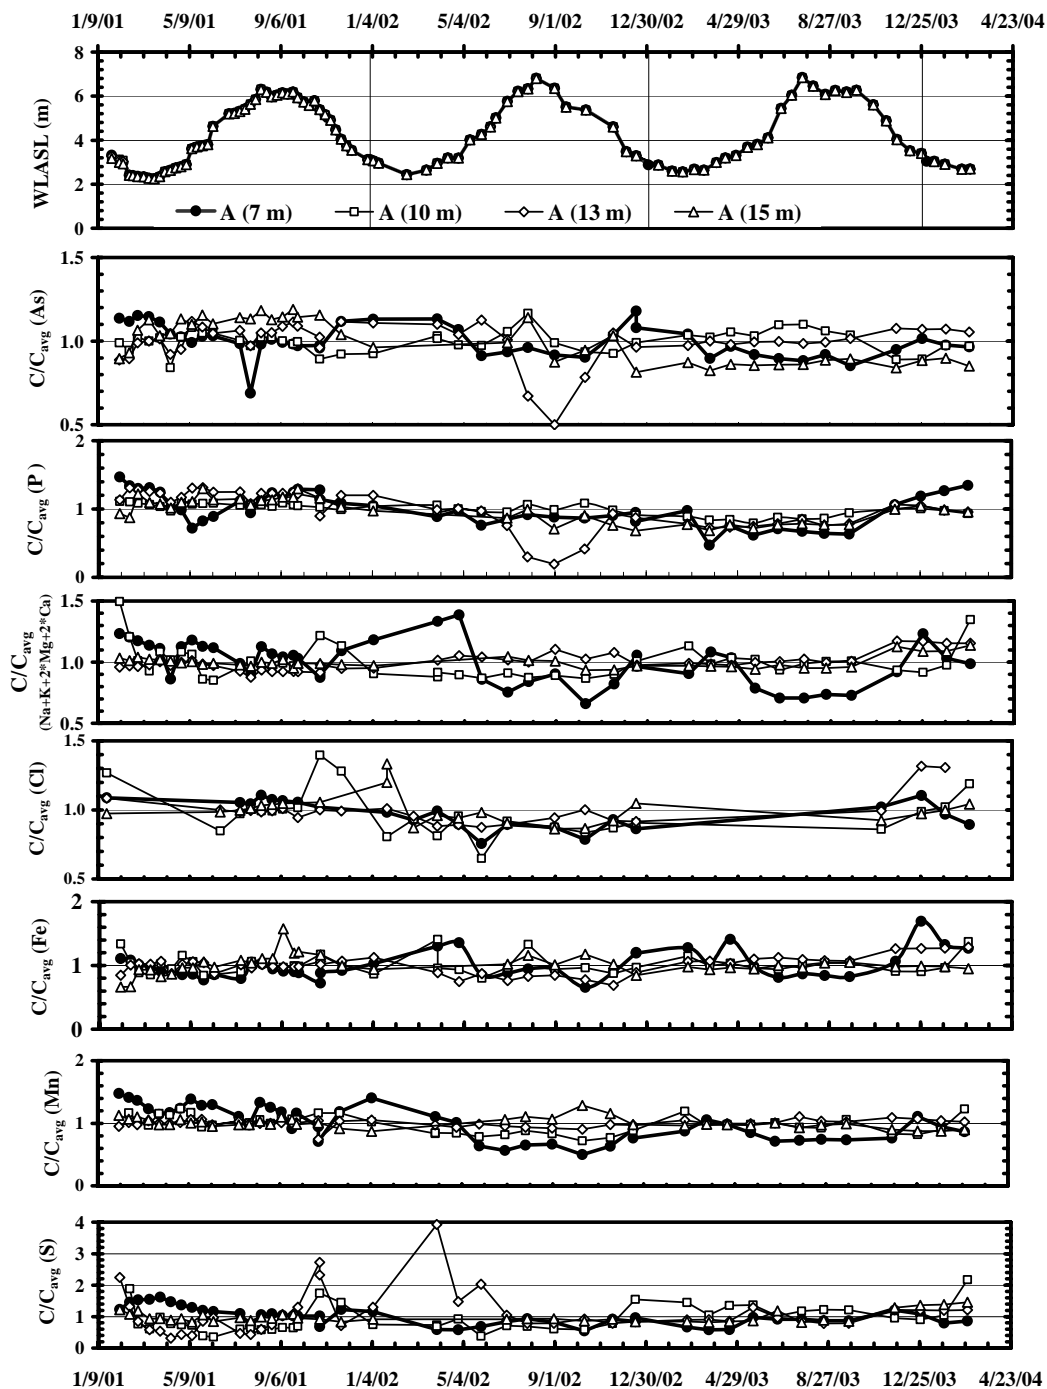

**Figure 5** Temporal variation in As and other ions concentrations in shallow aquifers of site F. Wells were installed in March 2002. The average concentration of dissolved ions including As from shallowest to deepest depths are summarized here: As (0.2, 35, 51, 215, 219  $\mu\text{g/L}$ ), P (0.1, 2, 4, 17, 32  $\mu\text{mole/L}$ ), SMC (1.6, 1.8, 2.4, 3.7, 5.2 meq/L), Cl (0.3, 0.2, 0.1, 0.05, 0.2 meq/L), S (40, 24, 19, 35, 0.3  $\mu\text{mole/L}$ ), Fe (2.4, 60, 23, 30, 350  $\mu\text{mole/L}$ ), Mn (3, 31, 27, 42, 35  $\mu\text{mole/L}$ ). The uppermost panel shows the water table fluctuation as water level above sea level (WLASL) with time.

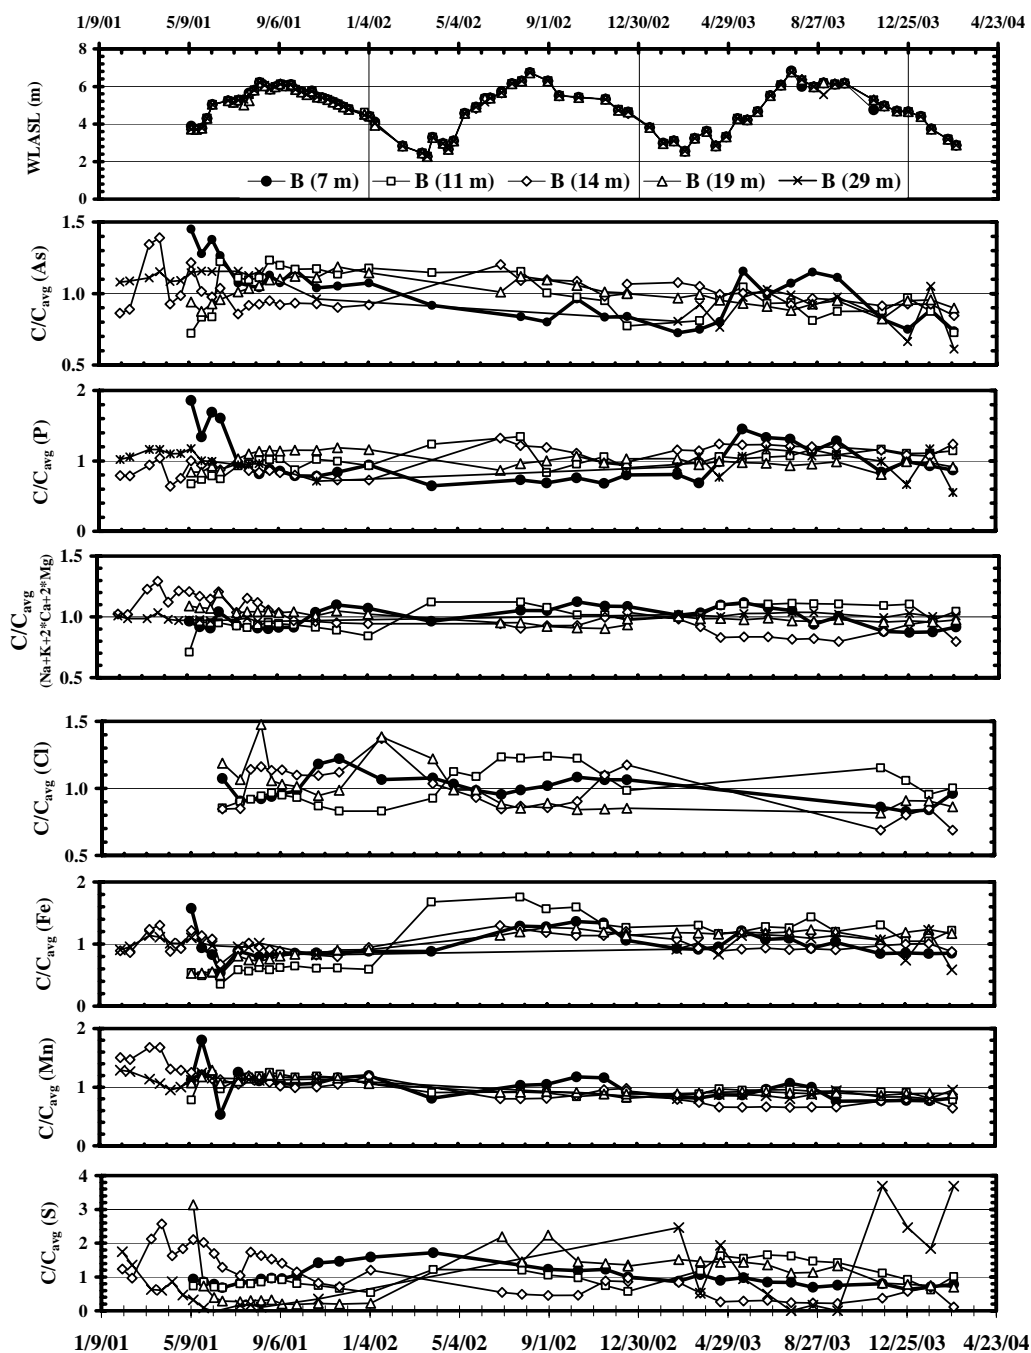

**Figure 6** Temporal variation in As and other ions concentrations in shallow aquifers of site G. Wells were installed in March 2002. The average concentration of dissolved ions including As from shallowest to deepest depths are summarized here: As (129, 158, 101, 173  $\mu\text{g/L}$ ), P (57, 106, 35, 42  $\mu\text{mole/L}$ ), SMC (4.6, 5.2, 4.0, 4.2 meq/L), Cl (0.1, 0.1, 0.2, 0.6 meq/L), S (21, 5, 1, 2  $\mu\text{mole/L}$ ), Fe (610, 497, 290, 195  $\mu\text{mole/L}$ ), Mn (25, 8, 29, 28  $\mu\text{mole/L}$ ). The uppermost panel shows the water table fluctuation as water level above sea level (WLASL) with time.

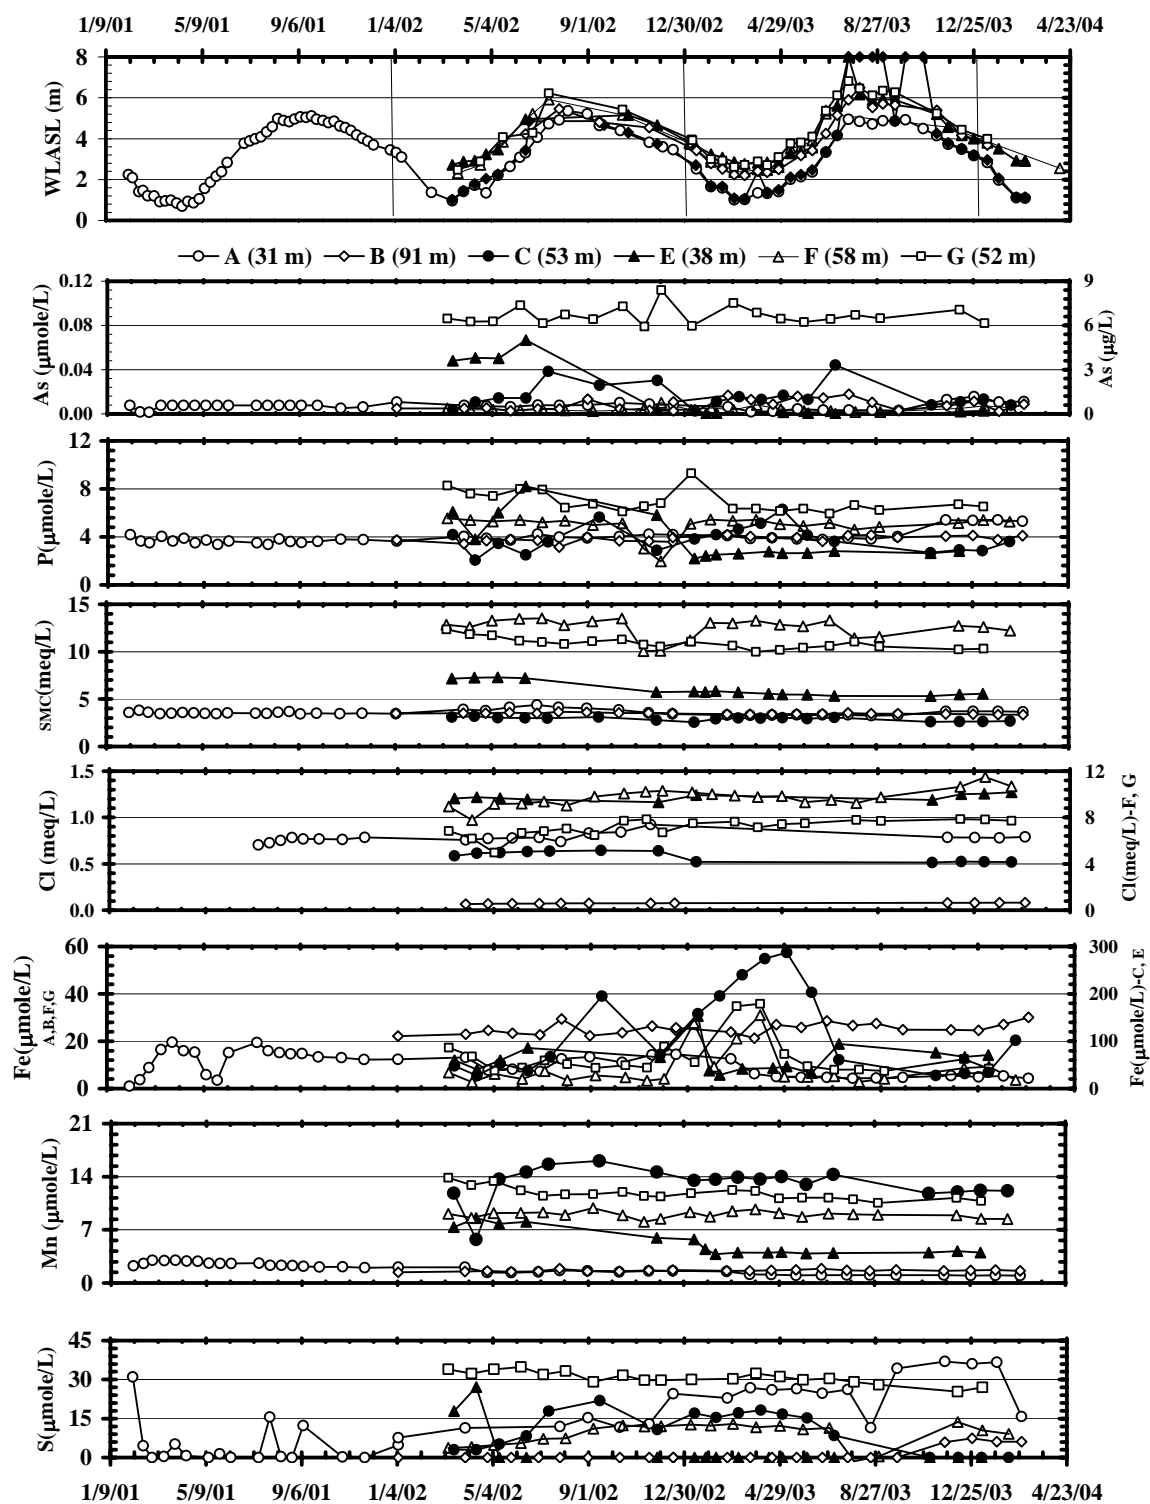

**Figure 7** Temporal variation in As and other ions concentrations in deep aquifers of all six sites. Different scale was used in right Y-axes to show higher level of Cl at site F, G and high level of Fe at sites C and E. The uppermost panel shows the water table fluctuation as water level above sea level (WLASL) with time.
